# Supplementary material for: Leveraging Tumor Microenvironment Infiltration in Pancreatic Cancer to Identify Gene Signatures Related to Prognosis and Immunotherapy Response
Source: Cancers (Basel). 2023 Feb 24;15(5):1442. doi: 10.3390/cancers15051442 (PMC10000708; doi:10.3390/cancers15051442)
Supplement: Supplementary file 1 [file cancers-15-01442-s001.zip › Supplementary Tables.xlsx]

## Sheet: Supplementary Tables Catalog
Supplementary Tables Catalog
Supplementary Table S1.Detailed information of retrieved datasets.
Supplementary Table S2.TME cell profiles were estimated via ssGSEA algorithm.
Supplementary Table S3.Three robust subtypes of PDAC (named as TMEgroup1-3) .
Supplementary Table S4.Detailed information of the signature genes associated with TMEgroups.
Supplementary Table S5.The 74 DEGs for TMEgeneGroup1 and TMEgeneGroup2.
Supplementary Table S6.Detailed information of DEGs between TMEgeneGroup1 and TMEgeneGroup2.
Supplementary Table S7.The tumor purity for PDAC patients in TCGA.
Supplementary Table S8.The feature genes for each mechanism/pathway.
Supplementary Table S9.The sequence of oligonucleotides and primers used in this study .
Supplementary Table S10.Antibodies used in the experiments .
Supplementary Table S11.Univariate and multivariate analysis of overall survival (OS) in PDAC patients.
Supplementary Table S12.Univariate and multivariate analysis of disease-free survival (DFS) in PDAC patients.

## Sheet: Table S1
Table S1. Detailed information of retrieved datasets
Data.ID	Sample.	Sample.with.	Survival.	Survival.	Stage	Grade
	Number	Survival.Data	Data	Data.Type
TCGA-PAAD	182	177	YES	OS	YES	YES
GSE28735	90	43	YES	OS	NO	NO
GSE57495	63	63	YES	OS	YES	NO
GSE62452	130	66	YES	OS	YES	YES
GSE71729	357	126	YES	OS	NO	NO
GSE78229	50	50	YES	OS	YES	YES
GSE85916	80	79	YES	OS	NO	NO
GSE79668	51	51	YES	OS	NO	NO
GSE15471	79	79	NO	NO	NO	NO
GSE34153	75	75	NO	NO	NO	NO
GSE36924	91	91	NO	NO	NO	NO
GSE43795	31	31	NO	NO	NO	NO
GSE45765	165	165	NO	NO	NO	NO
GSE50827	103	103	NO	NO	NO	NO
GSE55643	53	53	NO	NO	NO	NO
GSE60980	93	93	NO	NO	NO	NO
GSE62165	131	131	NO	NO	NO	NO
GSE77858	85	85	NO	NO	NO	NO
GSE81850	36	36	NO	NO	NO	NO

## Sheet: Table S2
Patient	Activated B cell	Activated CD4 T cell	Activated CD8 T cell	Central memory CD4 T cell	Central memory CD8 T cell	Effector memeory CD4 T cell	Effector memeory CD8 T cell	Gamma delta T cell	Immature B cell	Memory B cell	Regulatory T cell	T follicular helper cell	Type 1 T helper cell	Type 17 T helper cell	Type 2 T helper cell	Activated dendritic cell	CD56bright natural killer cell	CD56dim natural killer cell	Eosinophil	Immature dendritic cell	Macrophage	Mast cell	MDSC	Monocyte	Natural killer cell	Natural killer T cell	Neutrophil	Plasmacytoid dendritic cell	Fibroblasts_53_gene_set
TCGA-FB-AAPS-01A-12R-A39D-07	1.12477	0.394151	0.994965	0.482554	0.609344	0.403584	0.890084	0.469462	1.17864	0.61633	0.988544	0.669056	0.972413	-1.56307	-0.0129139	0.454859	0.233512	0.361811	0.141476	-0.180146	1.05737	-0.145988	0.809581	0.157639	0.704616	0.25584	-1.257	0.750873	1.05308
TCGA-FB-AAQ3-01A-11R-A41B-07	-0.792489	0.184549	0.394371	-0.105767	-0.463018	-0.950469	-0.429562	0.618648	-0.711496	-0.595433	-0.498761	-0.393053	-0.0363814	0.843383	0.854885	0.0851857	0.481505	0.0172385	-0.205044	-0.0180376	0.171154	-0.424143	-0.0975049	-0.213987	-0.134519	0.436903	-0.123008	-0.642881	-0.171898
TCGA-IB-AAUU-01A-11R-A37L-07	-0.572343	-0.161739	-0.502739	0.683916	0.176638	0.810249	-0.214781	1.06935	-0.521851	-0.0714165	0.573053	0.0211328	0.154009	1.66147	-0.0648363	0.678538	0.926793	1.03266	0.0479695	0.134759	0.382139	0.0181332	0.488835	0.310003	-0.226236	0.446944	1.05174	0.27154	-0.244521
TCGA-H6-A45N-11A-12R-A26U-07	3.01671	1.63305	2.62695	0.437684	-2.60466	0.805479	2.99524	-0.794864	3.39639	1.73524	0.622891	1.8337	0.345038	-4.23388	-0.735818	0.734917	-0.965906	-2.77974	1.5283	-0.446598	0.789086	-0.478633	1.90844	2.51619	-0.30182	0.732582	2.01301	0.710257	-2.44753
TCGA-OE-A75W-01A-12R-A32O-07	-0.81039	0.148033	0.954271	-0.61883	-0.18863	-1.01234	0.577112	-0.832248	-0.645747	-0.0113277	-0.445786	-0.404152	-0.28314	0.377758	-0.811519	-0.283995	0.936811	1.25765	-1.07918	-1.47798	-0.232054	-0.457823	0.281258	-1.24559	-0.523976	-0.0126127	0.23634	-0.857363	-0.191337
TCGA-3A-A9IO-01A-11R-A38C-07	-0.830822	-3.16001	-1.22124	-3.2938	-2.32059	-0.363808	-2.83186	-0.925488	-1.22886	-1.38802	-1.65788	-1.36903	-2.72644	-2.24551	-3.09659	-2.54879	-3.57208	-4.24079	1.11451	-0.801673	-2.09433	-1.09821	-2.73155	-1.10707	-1.85913	-3.01778	-1.73545	-1.88818	-2.98564
TCGA-IB-AAUM-01A-11R-A37L-07	0.419214	-0.652298	0.599773	-0.309221	-0.699885	0.172647	0.252961	-0.731833	0.101869	-0.713581	-0.159728	-0.181881	0.0965836	-0.371054	-1.15745	-0.544779	0.398938	0.0373433	-0.230011	0.0160571	-0.0302959	-0.246447	-0.0598293	-0.640595	-0.228426	-0.656533	-1.48796	0.117577	0.220946
TCGA-IB-7649-01A-11R-2156-07	0.59079	0.394583	0.860777	0.862187	0.614801	1.0271	0.217543	1.57947	0.591564	0.554647	0.966073	0.914062	0.865324	1.27234	0.824022	1.71369	1.37706	-0.402788	-0.0539784	1.77644	1.61284	1.39473	0.940431	1.30701	1.23505	1.31571	0.0256936	0.514355	0.438661
TCGA-IB-A7LX-01A-12R-A36G-07	-1.02468	-0.27901	-0.8133	-0.281406	-0.944431	-0.426089	-0.292251	-1.68365	-1.0863	-1.15542	-1.01567	-1.31912	-0.570622	-1.1437	-0.583146	-0.826243	0.137665	-0.740305	-0.751311	-0.972228	-1.06725	-1.1375	-0.986098	-1.72783	-0.34163	-0.757033	-0.869999	-1.54058	-0.491495
TCGA-HZ-8317-01A-11R-2404-07	-0.649364	0.13107	-0.707527	-0.0765854	0.973679	0.504132	-0.215374	1.01565	-0.786261	-0.570642	-0.0206325	-0.591653	0.0652721	0.619223	1.15915	0.0725243	0.405175	-0.821398	0.342529	0.543118	0.00677508	0.842032	-0.418493	-0.145988	0.153262	0.596465	1.66378	0.974969	0.827404
TCGA-3A-A9IH-01A-12R-A39D-07	-0.263949	-0.169614	-0.910938	0.131268	-0.594448	-0.706947	0.0674007	-0.254249	-0.376517	-0.691327	-0.450991	-0.377637	-0.215791	0.266962	0.702973	0.120286	-0.015995	0.638142	-1.0833	-0.339658	-0.332693	-0.736828	-0.46332	-0.172568	-0.1654	-0.918963	-0.646929	-0.60617	-0.174953
TCGA-IB-A6UG-01A-32R-A33R-07	0.640723	0.38842	0.0573745	0.297775	-1.35871	-0.360298	0.104494	-0.583322	0.62681	-0.111374	-0.874001	-0.894123	-0.712166	-0.501777	-0.202187	-0.113676	0.362953	0.0362634	-0.327004	-0.409509	-0.448459	-0.78953	-0.544921	-0.495011	-0.691861	-1.35563	-0.644307	-0.880108	-0.502463
TCGA-3A-A9J0-01A-11R-A41B-07	-0.0512332	0.123338	-0.683174	0.340056	0.289228	-0.419265	-0.729252	0.178197	0.087198	0.0994887	0.01589	-0.641033	-0.0491393	-1.13851	-0.543608	-0.0492129	-0.263398	0.348768	-0.340807	-0.779901	-0.253457	-0.0820168	-0.207592	-0.542766	-0.0655883	-0.431142	-0.931996	0.0502441	0.419413
TCGA-XD-AAUG-01A-61R-A41B-07	0.432678	-0.995388	-0.39639	0.169485	0.324524	0.366538	0.156783	-0.713278	0.1131	0.555	0.140963	0.68018	0.368744	-0.0953369	-0.839371	0.0695067	0.399776	-0.540034	1.78498	0.328007	0.335199	0.990142	0.1178	-0.399865	0.73888	-0.0716759	-0.582755	0.265818	1.28673
TCGA-2J-AABV-01A-12R-A41B-07	-0.349756	-0.719722	0.178302	-1.45221	-0.62288	-0.788232	-0.736521	-0.716423	-0.817938	-1.33964	-0.767224	-0.880117	-0.478058	0.937393	-1.26794	0.0230958	0.632832	-0.12508	0.349259	-0.148002	-0.0593558	0.100911	-0.392374	-0.236485	-1.31089	-0.228368	-0.539783	0.188403	-0.46618
TCGA-HZ-7926-01A-11R-2156-07	1.01947	0.795093	0.365929	0.585933	0.729261	0.456123	0.433931	-0.0683662	1.07288	0.615447	-0.147888	0.17039	0.506393	1.95286	0.522131	-0.356519	0.217452	0.279897	0.355865	1.46041	0.124086	0.140584	-0.177194	1.15098	0.0217676	0.529828	1.11495	0.596636	0.140803
TCGA-2J-AAB8-01A-12R-A41B-07	-0.00316725	0.26756	-0.277325	0.236909	0.476781	-0.214196	-0.561229	0.530296	0.0765782	0.504203	0.0141287	-0.209906	0.241741	-0.691255	0.467967	-0.834343	0.352283	-0.121837	-0.369497	-0.485867	-0.509366	-0.338134	-0.245882	-1.53637	0.0833344	0.142753	-0.59253	-0.102008	0.517806
TCGA-YB-A89D-11A-11R-A36G-07	0.357585	0.196589	0.456735	0.875368	1.30026	1.46252	1.07271	1.52194	0.487883	0.230705	1.49286	1.30528	1.26944	-0.0431674	0.00877347	1.77825	0.640092	0.94734	0.863541	0.801178	1.94578	1.38202	1.28361	1.08717	1.28402	1.18462	0.499006	1.49365	0.990936
TCGA-XN-A8T5-01A-12R-A36G-07	1.81481	0.533538	1.71033	0.754933	0.295511	1.00591	1.2193	0.267329	1.95789	0.433896	0.420906	1.04521	1.47963	-0.0509805	0.315984	-0.124305	0.697414	-0.116739	1.566	0.236072	0.224449	1.44127	0.679158	1.6167	1.07549	0.737428	-0.0127281	1.52067	1.11019
TCGA-HZ-A9TJ-06A-11R-A41B-07	-1.06379	-0.544951	-1.46944	-0.47019	-0.297595	-0.705174	-1.30787	-1.09793	-1.04129	-2.15309	-0.897508	-0.275496	-0.690908	-0.267458	0.0953389	-1.01872	-0.77524	-0.629883	-0.642462	0.701503	-1.02097	-1.42473	-1.01005	-2.05773	-0.139346	-1.25213	-1.85501	-1.59225	-0.806188
TCGA-IB-7645-01A-22R-2204-07	1.02008	1.00299	1.15519	1.04817	1.44857	1.50891	0.755511	1.51439	1.06621	1.77276	1.28374	1.28953	1.53705	-0.0428409	1.41342	1.28345	0.793979	0.0705124	1.76058	1.14917	1.54609	2.20882	1.26656	1.11442	1.66866	1.71647	1.73735	1.39194	1.07237
TCGA-3A-A9IL-01A-11R-A38C-07	-1.19998	-3.35633	-1.57002	-3.36403	-2.70212	-2.16854	-1.36195	-2.88679	-1.3973	-1.28279	-1.00435	-1.49522	-2.33002	-1.71659	-2.98901	-2.15954	-3.33105	-1.81047	0.726692	-1.43725	-2.07809	-1.15858	-1.60987	0.343179	-2.1046	-1.59605	-1.94977	-0.986708	-1.68997
TCGA-IB-A5SO-01A-11R-A32O-07	1.33993	0.709736	0.637542	0.668687	0.919506	0.0271441	1.07604	0.0478061	1.20733	0.650703	0.552814	0.518113	0.851289	-0.506892	0.799155	0.0978986	1.00534	0.783214	0.909676	0.131437	0.601885	0.242401	0.617407	-0.236815	0.63592	0.212565	-0.995269	0.473746	0.934165
TCGA-3A-A9I5-01A-11R-A38C-07	0.372001	-0.19136	-0.747703	-0.309688	-0.290582	-1.21622	-0.780178	-0.462449	0.173988	-0.691227	-1.1102	-0.173268	-0.505441	-0.193485	-0.819785	-0.0347451	-0.344172	0.15585	-0.739509	-0.580107	-0.14459	-1.02057	-0.789836	2.75421	-0.973245	-0.966268	0.573915	-0.517594	-0.257401
TCGA-2L-AAQA-01A-21R-A38C-07	-1.44784	0.444478	-0.953083	-0.282108	-0.391271	-1.25269	-0.486271	-0.527051	-1.18295	-0.158405	-0.509133	-1.25181	-0.90012	-0.0135294	0.126051	-0.831368	-0.555431	0.358351	-0.698949	-1.69581	-1.12117	-0.731271	-0.637415	-1.67535	-1.06876	-0.146358	-0.0320824	-0.878829	-0.522307
TCGA-F2-7276-01A-11R-2156-07	1.14644	0.486702	0.742428	0.772281	0.771239	1.52576	0.855858	0.925023	1.1212	0.676867	0.897791	0.923044	0.94283	0.153082	-0.00978999	0.731498	0.264282	-0.91037	1.52574	1.12015	0.796454	1.49448	0.873006	1.02895	1.13026	1.34148	1.39935	1.4061	0.810453
TCGA-RB-A7B8-01A-12R-A33R-07	0.156252	-0.0632427	0.36196	0.6771	0.85064	-0.282121	-0.197414	-0.09972	0.202724	-0.484614	0.554635	0.457375	0.44917	0.338091	-0.10494	0.0618162	-0.613024	0.11539	-0.860269	-0.476895	0.407145	-0.222483	0.482477	-0.514221	-0.011965	-0.0724508	0.0570123	-0.61903	0.531724
TCGA-2J-AAB9-01A-11R-A41B-07	-0.0330116	-0.214143	0.230106	0.480955	0.0796093	0.287181	0.065865	0.156497	-0.312529	-0.769968	0.220852	0.507889	0.375809	0.571615	0.102657	0.731352	0.402306	-0.446111	0.000552631	0.779173	0.441963	0.375205	0.235643	0.100538	0.74233	0.3191	-0.518603	-0.0527252	0.538662
TCGA-IB-7646-01A-11R-2156-07	-0.554991	1.56919	0.0207195	0.894229	1.72889	0.794331	0.363247	1.10101	0.0909331	0.329944	1.30411	0.95728	0.684175	-0.046951	1.41569	1.29334	1.67937	0.131418	0.843945	0.917852	0.757079	1.19159	0.678067	-0.221323	0.715865	1.67461	1.34306	0.708194	0.470318
TCGA-HV-A5A3-01A-11R-A26U-07	-1.10139	-0.780649	-1.38656	-0.0866776	-0.247331	-1.98503	-0.650692	-0.86997	-0.995756	-0.925734	-0.717084	-1.06773	-1.00231	0.130085	-0.644913	-0.0510098	-0.0584534	1.06371	-0.820483	-0.404549	-1.19847	-1.33494	-0.957044	-1.43406	-0.280083	-0.934309	-0.511901	-0.215764	-0.392285
TCGA-HZ-7920-01A-11R-2204-07	1.00698	0.211403	0.761425	0.526736	0.806017	1.64826	0.291966	0.416351	0.978264	0.868629	0.869554	0.775092	0.568303	-1.16682	0.186707	-0.0655632	0.351175	-2.32014	2.32422	1.62695	0.975113	1.39953	0.798463	1.22693	0.700208	0.813665	0.76295	1.44095	0.80263
TCGA-IB-7654-01A-11R-2156-07	0.304631	-0.723434	-0.51845	-0.269338	0.480839	0.030453	-0.542065	-0.0284154	0.0471714	0.613643	-0.31437	0.153784	0.0825484	-0.233373	-0.63591	-0.128967	0.594264	1.20725	-1.08196	-0.054919	-0.0730377	-0.106891	-0.535515	-0.288959	0.458216	-0.110197	-1.33711	-0.780321	0.648834
TCGA-HV-A5A6-01A-11R-A26U-07	-1.29162	-0.299313	-1.26607	0.242329	-0.553806	-0.76914	-0.754525	-0.339335	-0.946945	0.0453818	-0.287554	-1.0997	-0.576458	-0.209502	0.37361	-0.148351	0.265887	-0.160887	-0.762212	-0.409303	-0.466162	-1.16879	-0.737359	-1.34793	-0.610573	-0.274895	-0.531693	0.32818	-0.241909
TCGA-2J-AABP-01A-11R-A41B-07	0.32457	1.93374	1.25817	0.268026	0.650307	1.32633	1.3251	1.75128	0.425511	-0.215907	1.35385	1.645	0.421788	-2.37532	0.995373	0.290536	-0.343371	-0.254329	0.843488	-0.684546	1.39504	0.37213	1.22816	0.64118	0.222147	1.39106	0.405342	0.503722	0.470177
TCGA-IB-7891-01A-11R-2204-07	0.924867	0.848682	0.802237	0.894816	0.823278	0.843094	1.08556	0.844524	0.785555	1.04298	1.14463	1.02453	0.921311	0.793671	0.842252	1.12065	0.479024	-0.474978	-0.178666	1.19006	0.974333	0.942037	0.955439	1.15898	1.15831	0.601731	0.121932	0.731954	0.671017
TCGA-3A-A9IS-01A-21R-A39D-07	-1.93153	-2.90949	-2.50113	-4.42632	-3.79147	-1.11047	-3.3299	-2.55788	-1.70512	-0.948237	-2.30695	-2.06746	-4.03931	-2.53488	-2.6344	-3.34639	-5.37278	-4.06466	-0.00528535	-2.32974	-2.94704	-1.99887	-3.78784	-0.845419	-3.34188	-3.73256	-2.26993	-2.97285	-4.78129
TCGA-IB-AAUT-01A-11R-A37L-07	0.473688	-0.275131	1.22688	0.625568	0.107891	0.726989	0.956112	-0.126748	0.404026	-0.477627	0.60816	0.629584	0.62928	0.548597	-0.533284	0.839691	0.20153	0.327794	0.658041	1.14113	0.762855	0.437505	0.817096	0.655832	1.17859	0.325256	-0.458192	0.837528	0.572937
TCGA-XD-AAUI-01A-42R-A41B-07	1.11347	0.904642	0.0301019	0.35956	-0.357694	0.519261	0.329816	0.472847	1.10228	0.696835	0.551513	0.420669	0.597946	0.317041	-0.388632	-0.148781	0.633076	1.24473	0.0924629	0.113216	0.43665	0.41648	0.106249	0.56384	0.190278	0.569919	0.140345	0.189573	0.287056
TCGA-IB-8127-01A-11R-2404-07	-0.235593	0.524082	0.384053	0.839939	0.55639	0.707176	0.772439	1.08425	-0.0229947	0.804839	0.507417	0.497943	0.579934	0.126934	-0.141396	0.708708	1.098	0.0634434	-0.529915	0.19668	0.463772	0.598274	0.417981	-0.132963	0.413536	0.0772364	-0.069542	0.237738	0.271923
TCGA-FB-AAPY-01A-11R-A41B-07	1.18384	0.170549	0.686229	0.578888	0.0314698	0.683345	0.85417	0.0628444	0.822328	-0.0203903	0.620577	0.414207	0.592374	1.82079	-0.414962	0.861173	0.509932	0.737831	0.0599314	0.217904	0.896702	0.251056	0.774247	1.07112	0.266615	0.39119	0.287957	-0.0250392	0.00658961
TCGA-IB-A5ST-01A-11R-A32O-07	2.03408	1.10642	1.37008	0.698392	0.839878	0.99054	1.02816	1.43346	2.20334	1.28291	0.996465	1.59372	1.48662	-0.0189906	-0.0724332	0.683212	0.921514	-0.365477	0.441978	0.232	1.40129	1.27333	1.07079	1.71337	0.982672	0.369547	2.04424	1.52053	0.801829
TCGA-IB-AAUP-01A-11R-A37L-07	2.42002	1.57206	1.80663	1.3965	0.271037	1.58042	1.54651	0.309552	2.5927	2.76057	1.01716	1.59836	1.28937	-1.25169	0.455992	0.775864	0.721893	0.582038	0.409122	-0.341913	0.705177	0.88488	1.13315	1.31015	0.683796	0.756158	-0.313906	0.63037	0.739266
TCGA-IB-A5SS-01A-11R-A32O-07	-0.318469	0.20426	-0.0582699	0.594817	1.3882	0.360291	0.563483	1.64482	-0.125167	1.34195	1.13813	0.688022	0.529891	0.43307	0.797213	0.740856	0.445348	0.988168	-0.248497	0.102017	0.612116	0.0934411	0.572241	0.46282	0.26934	0.777895	0.16992	0.9468	0.600142
TCGA-3A-A9IJ-01A-11R-A39D-07	-2.40561	-3.69044	-2.60112	-3.87381	-2.56341	-0.504209	-2.59247	-2.844	-1.56895	-2.29121	-1.61755	-1.18	-2.82114	-2.5537	-4.35637	-3.21102	-2.77812	-3.34824	0.200027	-2.237	-1.60755	-0.985668	-3.20049	-0.92521	-2.53744	-3.10664	-2.20562	-1.77509	-3.08672
TCGA-3A-A9IR-01A-11R-A38C-07	-1.45172	-3.62076	-1.50024	-3.99891	-3.55888	-2.32254	-3.00318	-2.60452	-1.53137	-2.68808	-2.439	-1.69739	-3.11206	-1.20408	-5.64525	-2.64365	-3.66034	0.208949	-0.984771	-3.86105	-3.11964	-1.21463	-2.63114	-1.47827	-2.99096	-4.537	-0.810681	-1.8704	-4.12994
TCGA-HZ-A4BH-01A-11R-A26U-07	0.835469	1.3062	0.763399	0.888058	0.312729	0.740853	0.874703	0.221108	0.956403	0.663163	0.525422	0.805841	0.712225	0.336588	0.919057	0.304182	0.729673	-0.0263839	1.13771	0.168954	0.785014	0.209339	0.318847	-0.429047	0.801373	0.798527	-0.710355	-0.161966	0.585157
TCGA-LB-A9Q5-01A-11R-A39D-07	-0.104972	0.0553705	0.0926738	0.229904	0.839648	0.0967138	0.0779838	0.604762	0.152991	0.00323782	0.930162	0.662161	0.615826	0.703837	0.160064	0.663718	0.734058	0.776182	0.856607	1.19308	0.800548	0.685292	0.828597	0.49316	0.611392	0.644042	1.46832	1.30515	0.320412
TCGA-2L-AAQE-01A-11R-A39D-07	0.649055	0.378794	0.338944	-0.0650369	-0.443798	-0.434733	0.305971	0.246938	0.604734	-0.0806375	-0.945962	-0.714711	-0.0599546	-0.531315	0.518475	-0.941234	0.124295	-0.0898136	-0.604602	-0.666042	-0.478143	-0.38972	-0.765531	1.02096	-0.245695	-0.0923937	-1.44953	-0.312448	-0.0121663
TCGA-Q3-AA2A-01A-11R-A37L-07	-0.50626	-0.283799	-0.375686	-0.00607674	-0.205471	-0.89939	-0.0638732	0.473986	-0.607737	-0.910705	-0.318983	-0.654046	-0.607983	1.89159	-0.48826	0.285955	0.10977	0.556216	0.215293	-0.545914	-0.0799515	-0.872585	-0.137566	-0.466266	-0.213551	-0.624103	-0.889964	-0.142871	-0.476902
TCGA-FB-AAQ6-01A-11R-A41B-07	-0.527269	-0.606262	-0.975618	-0.339279	-0.372111	-0.684185	-1.06384	-1.46486	-0.761637	0.338156	-1.21342	-1.30885	-0.757228	0.136809	0.00245713	-0.609409	0.440545	0.324055	-1.46771	-0.885599	-1.22589	-1.59595	-0.947911	-1.56263	-1.02334	-0.441718	0.357377	-0.898136	-0.569661
TCGA-M8-A5N4-01A-11R-A26U-07	-0.598121	-0.0809431	-0.658736	0.207959	0.851441	-0.646029	0.0340074	0.0793013	-0.292971	-0.978524	0.844617	0.316838	0.0967997	0.512127	-0.205144	0.533777	-0.750948	0.608378	0.0555007	0.084219	0.568055	-0.0997372	0.670257	-0.028436	0.249783	0.918931	1.32444	0.253125	-0.0147367
TCGA-H6-8124-01A-11R-2404-07	-1.22977	-0.762805	-1.67476	-0.0202008	-0.620841	-0.820196	-0.963277	-1.01133	-1.26773	-0.408437	-0.795115	-1.22332	-1.0716	-0.491915	-0.189076	-0.258307	-0.604451	-0.91985	-1.1993	-0.168321	-1.35519	-1.12024	-1.46286	-1.44567	-0.251249	-0.657153	-1.64514	-0.79617	0.112219
TCGA-IB-A5SQ-01A-11R-A32O-07	0.559723	0.651986	0.115663	0.505576	0.550072	0.270711	0.384049	1.1277	0.475798	0.0752734	1.03578	0.740989	0.749865	0.144006	0.46285	0.592568	0.785464	-0.508666	0.449038	0.970449	0.771146	0.913459	0.55834	0.576434	0.709783	0.530033	0.450327	0.753547	0.757621
TCGA-IB-7652-01A-11R-2156-07	0.0969036	0.0415128	-0.465077	0.135282	0.747158	-0.26899	0.295082	0.720934	0.262387	-0.347708	1.14523	1.25	0.657409	0.310222	0.503073	1.45572	-0.290744	0.638464	0.178018	1.37279	1.0792	1.28385	0.820385	1.03142	0.94814	0.890225	0.486875	0.78978	0.408441
TCGA-HZ-8315-01A-11R-2404-07	0.0882076	0.368548	0.421582	0.573967	0.742104	0.181393	0.942655	0.614567	0.13851	0.513462	0.436943	0.532369	0.541111	0.356745	0.560051	0.745922	-0.205393	-1.45157	1.02664	0.90454	0.481835	0.46035	0.478628	0.732566	0.763967	0.0663605	0.277201	0.55588	0.572691
TCGA-HV-A7OL-01A-11R-A33R-07	1.56707	0.860397	1.40233	-0.293083	0.535084	-0.018871	0.844919	0.0634939	1.52857	0.7808	0.528079	0.759059	0.461631	0.204825	0.450709	0.387719	0.543161	2.05144	0.830568	-0.498525	0.797404	0.160526	0.84562	0.781207	-0.348094	-0.15551	1.21623	-0.259267	-0.7549
TCGA-HZ-A49G-01A-11R-A26U-07	-0.225126	-0.171263	0.356372	0.420309	0.349308	0.395917	0.633974	0.569689	0.0806005	-0.43747	1.22565	0.744308	0.785285	0.32417	-0.306239	1.23672	0.510778	0.798385	0.0877282	0.907269	1.01215	0.946494	1.15926	0.59152	0.626974	0.151366	-0.630449	0.398213	0.546284
TCGA-2J-AAB6-01A-11R-A41B-07	-1.09546	0.292123	-1.16516	-0.178358	0.0652131	0.320272	-0.25809	0.385375	-0.47763	-1.14128	0.465442	0.0532742	-0.658174	-0.662314	-0.0832449	0.306821	1.48759	-0.169912	-0.663407	-0.0227871	-0.272534	-0.143819	-0.115876	-0.517525	-0.157617	-0.0950023	-0.38333	0.0609901	0.295695
TCGA-HZ-A8P1-01A-11R-A37L-07	-1.27565	-0.333239	-0.775728	-0.447879	-0.846355	-0.780959	-1.18788	-0.428896	-1.23223	-0.333483	-1.77913	-1.56276	-1.08907	-0.450873	-0.292435	-1.63712	-1.14088	0.996292	-0.965726	-1.40035	-0.895443	-1.85189	-0.912462	-1.6191	-1.7388	-0.686635	0.422055	-1.62139	-0.863079
TCGA-3A-A9I9-01A-11R-A38C-07	-0.506297	-0.787999	-0.0992556	-0.444254	-0.228655	-0.222356	-0.28875	0.154302	-0.609782	-1.30884	0.253114	0.049963	-0.22459	0.756577	-0.840823	0.502419	-0.300667	0.665801	-0.996467	0.298282	0.18815	0.102262	0.419902	0.0511427	-0.0618844	-0.00849242	0.616133	-0.0732833	-0.0520412
TCGA-HZ-8519-01A-11R-2404-07	0.0209243	-0.099251	0.660743	0.43487	0.260714	1.00682	0.673133	-0.340525	0.0405228	0.399258	0.185526	0.471597	0.472635	-1.56512	-0.102858	-0.023471	-0.422213	-1.35112	1.30179	0.98377	0.22003	1.05884	0.355308	0.711472	0.172989	-0.255611	0.426938	0.492799	0.78426
TCGA-FB-AAPZ-01A-11R-A41B-07	0.0655629	0.9465	0.566684	0.717829	0.38413	0.357966	0.185541	0.718482	0.0596959	0.22377	0.504881	0.413817	0.418373	0.66037	0.796199	0.57928	0.453147	0.180911	0.9864	0.491751	0.775814	0.602707	0.276856	0.172696	0.611502	1.06458	0.342152	1.50802	0.206873
TCGA-2J-AABK-01A-31R-A41B-07	-0.205498	-0.14247	-0.338849	-0.626598	-1.16019	-0.616524	-0.720258	-0.822871	-0.605891	-1.04921	-1.16837	-0.980053	-0.805934	0.0862546	-0.162273	-0.372178	0.812977	-0.755795	-0.310933	0.0532816	-0.85235	-0.576662	-0.660774	-0.861938	-1.22558	-1.17241	-0.122175	-1.39907	-1.19993
TCGA-HV-A7OP-01A-11R-A33R-07	-1.08555	-1.43346	-1.13051	-3.68701	-2.78411	-2.3605	-1.90822	-2.44218	-1.60232	-2.0934	-2.22626	-1.99568	-2.35144	-2.0484	-1.81315	-1.72546	-1.60635	-0.53548	-2.61557	-2.56037	-1.9948	-2.36712	-1.55482	0.272879	-3.22483	-1.78673	-1.79231	-3.09077	-4.13543
TCGA-HV-AA8X-01A-11R-A39D-07	-0.702359	-0.426007	-1.0426	-1.03563	-0.519792	-2.32111	-0.519354	-0.964583	-0.772518	-0.292455	-1.24628	-1.17579	-0.852387	0.184802	0.398339	-0.719242	-0.0159204	0.144889	-1.32502	-0.482464	-1.1239	-1.5321	-1.41805	-1.1402	-1.07116	-0.692892	-0.0794334	-1.061	-0.851722
TCGA-US-A779-01A-11R-A32O-07	-0.583733	-1.65459	-1.51193	-0.995707	-1.54248	-2.15319	-1.0002	-0.796363	-1.21135	-1.88228	-1.63541	-1.34312	-1.50255	1.03961	-1.71551	-1.30734	-0.384839	1.08046	-0.784229	-0.916403	-1.07504	-1.69497	-1.49034	0.0320679	-1.74929	-1.37685	-1.85487	-1.34903	-1.47178
TCGA-3A-A9IN-01A-11R-A39D-07	-0.930106	-2.65932	-0.767095	-2.19179	-1.65298	-1.02033	-0.57564	-1.93818	-0.904886	-0.592916	-0.547654	-0.868511	-1.1394	-1.84231	-2.9559	-2.5489	-1.66983	-0.608347	1.19569	-1.13142	-1.50044	0.125443	-1.60845	-1.05288	-1.34695	-1.73212	-1.29883	-1.48681	-0.175679
TCGA-F2-7273-01A-11R-2156-07	0.353271	0.290872	0.398579	0.625897	0.84447	1.18897	0.852216	0.235468	0.403769	1.00483	0.966667	1.08992	0.984604	0.69321	0.245073	1.27964	-0.185166	-0.464355	1.45977	1.6874	1.02916	1.09841	1.00002	1.38791	1.44462	1.28357	0.965007	1.35738	0.964504
TCGA-HZ-8003-01A-21R-2204-07	0.987991	1.04321	1.19764	0.46075	1.21693	0.877795	0.915795	0.553958	1.03819	1.70276	1.12545	1.03776	0.771607	0.208681	0.385574	0.784364	0.779216	0.0587045	0.796783	1.20776	0.93898	1.04557	1.17177	0.798485	0.996833	0.672699	1.12157	1.4343	0.674823
TCGA-3A-A9IC-01A-11R-A38C-07	-0.743294	0.160208	-0.507718	-0.0681993	0.937557	-0.217619	-0.184775	0.253539	-0.567491	0.424377	0.0701166	0.303538	0.144673	-0.0240019	0.900898	0.314979	-0.133494	0.175289	0.665116	0.581744	0.322964	0.0997246	0.0184428	-0.539738	0.161045	0.413535	1.12373	0.29353	0.578339
TCGA-IB-8126-01A-11R-2404-07	1.00779	0.793071	1.75324	0.386501	0.511746	0.51763	0.930023	0.369107	1.01265	0.114186	0.513032	0.614609	0.832354	0.101103	0.465183	0.39046	0.983905	-0.744836	1.6708	1.12726	0.599278	1.21122	0.588643	0.221956	1.0083	0.312154	0.493942	1.12819	0.84718
TCGA-2J-AAB4-01A-12R-A41B-07	-0.47082	0.415432	0.0799221	0.00228186	-0.235439	0.315252	0.0684085	-0.307618	-0.590618	-0.660144	0.0771713	0.2813	0.215941	2.08628	0.300815	0.0545597	0.0506691	-0.401282	-0.119816	0.748375	-0.157094	0.101772	0.290594	-0.299628	-0.252348	0.937609	0.303279	-0.0734602	-0.134516
TCGA-HZ-8638-01A-11R-2404-07	-0.28505	0.694531	0.622947	-0.0476076	0.0543024	-0.239488	0.0275303	0.360305	-0.45055	-0.479477	-0.887354	-0.997002	-0.0992115	0.83956	1.18631	-0.527197	-1.10231	-1.32942	-0.443517	0.6237	-0.697096	-0.099908	-0.470819	-0.632091	-0.24654	0.0310674	1.9565	0.227806	-0.495339
TCGA-IB-AAUN-01A-12R-A38C-07	0.118852	0.399317	-0.358616	-0.141718	-0.350012	-0.727584	0.197955	0.159781	-0.0965752	0.362678	-0.311808	-0.264693	-0.43698	0.568807	0.0312659	-0.420386	-0.113425	-0.794447	-0.827012	-0.702401	-0.501813	-0.650472	-0.390092	-1.07526	-0.51129	-0.183935	-0.777702	-0.562139	0.0208427
TCGA-US-A774-01A-21R-A32O-07	0.892474	-0.00170174	0.607492	0.21788	1.06761	0.0808816	0.390375	1.01404	0.698333	0.247223	0.759482	0.545442	0.684314	0.727096	-0.086788	0.350682	0.0881676	-0.0617501	0.259068	0.409156	0.633874	0.376908	0.470347	0.394443	0.806338	0.991839	0.427594	0.410273	0.685769
TCGA-IB-AAUS-01A-12R-A38C-07	0.56973	0.75069	1.17409	1.00098	1.36525	1.5235	0.729273	1.60436	0.820312	0.856139	1.81041	1.37621	1.37352	-0.352802	0.543529	1.85991	1.20172	0.256091	1.33742	1.68353	2.06824	1.50803	1.65015	1.95851	1.19562	1.88059	1.52833	2.03647	1.00524
TCGA-IB-7651-01A-11R-2156-07	0.588595	0.842841	0.733476	0.572438	1.37269	0.570353	0.720246	1.27756	0.516903	-0.069364	0.92588	0.789418	0.806003	0.2784	0.889313	0.603194	0.248517	0.452221	-0.994808	0.0501098	0.304479	0.615535	0.8559	0.309961	1.01634	1.31089	-0.341339	0.454603	0.183514
TCGA-2J-AAB1-01A-11R-A41B-07	-0.166511	0.490555	0.767966	0.509456	-0.170196	0.0397491	0.681928	0.0544559	-0.206715	-0.701662	0.0325409	0.261513	0.424669	1.8289	0.864563	0.218682	0.690927	0.560694	-0.132343	-0.218157	0.147729	0.136703	0.192823	0.299208	0.304687	0.466867	-0.8088	-0.335454	0.0413304
TCGA-3E-AAAY-01A-11R-A38C-07	0.430642	0.36715	0.786948	0.300308	0.796773	0.849411	0.811345	0.214222	0.32945	-0.271353	0.76646	0.48235	0.713311	0.404933	0.147962	0.00226679	0.465024	0.624715	1.18989	0.772205	0.687428	0.595604	0.753672	0.242491	0.706017	-0.283976	1.02598	0.738279	0.417613
TCGA-IB-7893-01A-11R-2204-07	-0.681946	0.454097	-0.854826	0.480903	1.40799	1.34784	-0.392152	1.04061	-0.160887	2.3397	0.854705	0.794654	0.453205	-1.84155	1.234	0.589963	0.508853	-1.28165	-0.241385	1.44156	0.414224	0.679628	0.226903	-0.440119	0.465457	0.747361	-0.797455	0.167777	1.09466
TCGA-2L-AAQL-01A-11R-A38C-07	-0.273339	-0.563035	0.179186	-0.102025	-0.0993441	-0.234049	0.354314	-0.480895	-0.30775	-0.822499	-0.103233	0.168038	0.33465	1.37857	-0.285207	0.437326	0.158777	0.612733	0.0206217	-0.254924	0.420365	0.0369732	0.0974603	0.305515	0.31192	0.256424	-0.290084	-0.520025	0.11273
TCGA-LB-A7SX-01A-11R-A33R-07	-0.0511331	-0.0978394	-0.506026	-0.842804	-0.951649	-1.79089	-0.443215	-1.19178	-0.662603	-0.858761	-1.01817	-1.76872	-0.997182	-1.03118	-0.550058	-1.83142	-0.778374	-0.986728	-0.696528	-0.922253	-1.21005	-2.00102	-0.292585	-0.577152	-0.935393	-1.46332	0.28798	-0.910123	-0.818547
TCGA-IB-7887-01A-11R-2156-07	-0.643791	-0.327931	0.358648	-0.0590323	0.782614	-0.526117	-0.315566	0.0109805	-0.573133	0.0268323	-0.0997538	0.350746	0.262208	0.145307	0.0930493	0.24315	-0.187776	0.349508	-1.2409	0.367536	-0.806934	-0.386959	0.159643	-0.6193	0.518112	0.108291	1.41153	0.483305	0.482999
TCGA-HZ-8002-01A-11R-2204-07	0.514105	0.385065	0.617242	0.718826	0.613693	1.66045	0.401237	0.962085	0.459614	0.781306	0.894068	0.61675	0.723501	-0.00405473	0.679658	0.639527	0.843095	-1.16311	0.971495	1.34764	1.10417	1.8941	0.815627	0.521401	1.14378	1.13903	0.885624	0.859759	0.992132
TCGA-FB-AAQ2-01A-31R-A41B-07	0.196779	0.497223	-0.689651	-0.536866	-0.896788	-0.591114	-1.08935	-0.355624	0.0898074	0.377513	-0.453534	-0.725089	-0.938505	-1.35589	0.0895152	-1.20273	-1.32107	-0.463285	-0.965581	-0.511026	-1.15436	-0.940209	-1.15324	-0.910178	-0.784658	-0.721555	-1.5811	-1.35415	-0.63547
TCGA-3A-A9IX-01A-11R-A41B-07	1.20639	0.379942	1.1917	0.884809	0.476324	1.28108	0.624521	0.616587	1.11613	0.364085	0.675851	1.13624	1.11911	0.390277	0.878199	0.467843	0.668917	-0.577385	1.0616	0.736041	0.663716	1.66872	0.819294	1.24147	1.01901	0.353232	-0.331279	1.15115	0.894179
TCGA-F2-A8YN-01A-11R-A37L-07	-0.91424	-0.664915	-0.901355	-0.173824	-0.10216	0.0715256	-0.587347	0.229356	-0.833543	0.771356	-0.17676	-0.298718	-0.0611989	0.505322	-0.0970888	0.179507	0.195961	-0.239867	-1.39985	0.441004	-0.162305	-0.599738	-0.000887438	1.04706	-0.48281	0.0772429	1.02921	0.112507	0.14778
TCGA-HV-AA8V-01A-11R-A41B-07	-0.273007	-1.0331	-0.551816	0.177105	0.471083	0.262356	0.135501	0.849767	-0.406563	-0.511988	0.683697	0.543363	-0.0271043	0.323854	-0.279534	0.948251	-0.209427	0.647711	-0.363745	1.08674	0.372737	-0.027874	0.23327	-0.332109	0.386439	0.0927534	-1.01939	0.197897	0.863001
TCGA-L1-A7W4-01A-12R-A36G-07	-1.44061	0.169785	-1.73245	-1.50984	-0.965675	-1.10267	-2.03022	-0.784325	-0.930888	-0.991275	-1.24769	-1.81056	-1.00581	-1.07763	-0.0885242	-1.79042	-1.56573	-2.6892	-0.707653	-1.09348	-1.67565	-1.21199	-1.19169	-1.38191	-1.03251	-1.42684	-1.23029	0.662372	-0.0723276
TCGA-YH-A8SY-01A-11R-A37L-07	-0.844844	0.240926	-0.999175	0.344644	0.745575	-1.17014	-0.596205	-0.213286	-0.656876	0.47471	0.291824	-0.204847	-0.287015	-0.960862	-0.141952	0.102083	-0.300919	0.909469	0.21556	-0.139958	-0.644882	-0.37207	-0.154226	-1.05456	-0.163872	0.210046	0.157076	-0.0156098	0.740797
TCGA-IB-7889-01A-11R-2156-07	1.3243	0.558888	1.31256	0.815982	0.272265	0.327576	0.477406	0.875908	1.14344	0.705889	0.800565	0.925061	0.76035	0.83162	0.801577	1.03403	0.786173	-0.339966	0.217312	0.35748	1.13443	1.19279	0.928236	1.39292	0.758084	0.56178	0.0716412	-0.161988	0.218865
TCGA-US-A776-01A-13R-A33R-07	-0.894722	-1.22723	-1.01961	-1.93828	-2.70754	-1.8189	-3.09619	-2.55638	-1.56886	-0.600944	-3.08811	-3.46635	-2.72919	-0.609963	-0.889604	-3.08611	-0.981645	1.35217	-2.30125	-2.28905	-1.68217	-2.55076	-2.34454	-1.3581	-3.07232	-2.23654	-1.27592	-1.40982	-1.89971
TCGA-LB-A8F3-01A-11R-A36G-07	-1.07245	-0.855641	-1.32229	-0.717283	-0.422498	-1.47058	-0.597404	-0.692516	-0.911952	-1.63355	-1.11887	-0.322361	-0.668252	0.745437	0.0716795	-0.228518	-0.20546	0.234743	-0.463301	-0.745367	-0.764708	-0.280609	-0.496509	0.735233	-0.93998	-0.711489	0.392933	-0.86889	-0.554064
TCGA-H8-A6C1-01A-11R-A32O-07	0.580521	0.235533	-0.508421	0.225487	0.0656912	-0.228287	0.206735	-0.31316	0.47836	-0.0998	0.105696	-0.19325	-0.0841755	1.8461	0.0276594	-0.0303895	-0.0465762	-0.190802	-0.946628	-0.310427	0.249749	-0.840982	0.128265	-0.0369631	-0.33973	-0.248976	1.09037	-0.297176	-0.034671
TCGA-F2-A7TX-01A-33R-A38C-07	0.525307	1.76766	1.50801	0.197843	0.444473	0.823377	0.803171	0.78933	0.696806	0.16477	0.575222	0.456836	0.699684	0.134816	1.2771	-0.0477408	0.755407	-0.0413104	-0.282853	0.189197	0.604471	0.809523	0.473875	0.419486	0.611285	0.640171	0.167273	0.3856	-0.123701
TCGA-IB-A7M4-01A-11R-A36G-07	0.581869	0.805067	0.87406	0.306291	0.069253	-0.333151	0.221313	0.20612	0.647504	0.3982	0.0064511	-0.24309	0.0284726	-0.267204	0.477894	-0.191301	2.32707	1.21878	-1.39625	-0.213953	-0.422181	-0.936396	-0.0357307	-0.581826	-0.190371	0.302235	0.626389	-0.91537	-0.444854
TCGA-3A-A9IZ-01A-12R-A41B-07	-1.16523	0.493986	-0.983146	-0.720224	-0.125419	-0.626938	-0.953912	-0.878651	-1.07027	-0.954241	-1.08751	-0.874947	-0.778209	1.12428	0.820806	-0.0166196	-0.409894	0.957725	-0.530211	-0.277888	-1.12886	-1.06747	-1.22273	-1.64744	-0.75132	-0.222859	0.761464	0.219377	-0.141171
TCGA-HZ-7919-01A-11R-2156-07	-0.156162	0.756534	0.457494	0.662452	0.338207	0.236321	0.0969981	1.1149	-0.033008	0.905999	0.032082	0.800583	0.11605	0.848839	1.47448	0.0392904	0.92616	-0.160753	0.144349	0.399485	0.0630199	0.551171	0.116242	-0.401808	0.575182	0.727071	-0.187531	-0.0339201	0.199699
TCGA-US-A77G-01A-11R-A32O-07	-0.842061	-0.415257	-0.873479	-0.65844	-1.81619	-1.68088	-0.524065	-1.26383	-1.10123	-1.11839	-1.70469	-1.67331	-1.00223	1.02267	-0.890316	-1.37452	-0.251257	-0.563599	-1.27795	-1.54593	-1.07471	-0.958094	-1.07398	-0.747282	-1.44344	-1.58558	-1.10599	-1.86159	-1.60291
TCGA-2J-AABF-01A-31R-A41B-07	0.305507	0.76461	0.340959	0.427834	1.01626	1.08972	0.429834	0.80264	0.253629	-0.394504	1.04472	0.615036	0.469227	0.38364	0.25843	0.914476	-0.234319	0.456067	-0.205895	0.814967	0.783086	0.577136	0.888675	0.692868	0.626561	0.161683	1.34999	0.263986	0.113866
TCGA-HZ-7924-01A-11R-2156-07	0.746369	0.369951	0.058291	0.0962371	0.375418	0.0783703	-0.332046	0.97753	0.516971	1.25306	-0.715377	0.165965	-0.118801	0.609798	0.836228	-0.385527	0.307391	-0.27725	-0.0940037	1.26146	0.0507231	0.168922	-0.180459	1.10865	-0.0788015	0.142315	1.14173	1.4746	-0.661074
TCGA-Z5-AAPL-01A-12R-A41B-07	2.81546	2.52096	2.40174	1.40843	-0.268913	0.880559	1.77321	0.227736	3.04546	2.97391	1.08883	0.899333	1.18909	-1.18073	0.649553	1.1269	0.121132	0.728522	2.39802	-0.570649	0.116044	0.406225	1.20323	1.52125	0.557087	1.44422	-0.537612	0.435275	-0.282563
TCGA-HZ-A77Q-01A-11R-A36G-07	1.23431	0.595752	0.922551	0.898458	1.62277	1.19111	0.884049	1.30836	1.46975	1.1022	1.22381	1.28241	1.37318	-0.0811139	1.15283	1.52361	1.37059	0.31832	1.04198	0.591043	1.66885	1.49987	1.11067	1.28343	1.24031	1.26185	1.64992	2.18569	1.12907
TCGA-FB-A545-01A-11R-A26U-07	-0.859585	-1.03101	-1.87955	-0.881432	-1.04812	-1.87295	-1.80375	-2.21358	-1.23117	-0.0221316	-1.81548	-2.39822	-1.54644	-0.772491	-0.295714	-1.14754	-0.67283	0.49937	-1.38174	-0.836618	-2.31289	-1.30275	-1.65921	-1.91451	-0.610904	-0.787911	-1.45927	-1.05163	-0.129115
TCGA-FB-AAPQ-01A-11R-A41B-07	-0.717413	0.0301392	-1.1618	-0.00372049	-0.650337	-0.348761	-0.959498	-1.05392	-0.819472	-0.602654	-0.922374	-1.17966	-0.72937	1.51165	-0.0515318	-0.0112276	0.669389	0.318023	-0.766076	-0.667294	-1.10047	-0.629566	-0.904027	-1.38537	-1.01652	0.440082	1.16331	-0.892203	-0.179873
TCGA-2J-AABR-01A-11R-A41B-07	0.597979	1.06638	1.22736	0.769885	0.374591	0.31606	0.78404	0.488102	0.503401	-0.286293	0.500067	0.742909	0.867418	1.56871	0.578107	0.847094	0.891626	-0.46654	1.2271	0.947296	0.815578	0.742681	0.678283	1.09133	1.00116	1.15015	0.453469	0.976625	0.526681
TCGA-RB-AA9M-01A-11R-A39D-07	0.0756401	-0.00179072	-0.393435	0.272371	-0.105308	0.683784	0.0247124	-0.970383	-0.337811	0.0432826	-0.752383	-0.302906	-0.0528225	0.321504	0.115216	-0.58545	-0.222146	-0.89633	0.471617	0.430303	-0.37088	-0.359506	-0.657798	-0.264348	0.313094	-0.277325	-0.126654	0.183008	0.304092
TCGA-3A-A9IU-01A-11R-A39D-07	0.170108	-0.546137	-1.08951	-0.395035	0.00306165	0.141664	-0.944928	-0.996784	-0.00253664	-0.642923	-0.73481	-0.665236	-0.644699	-0.341871	-0.228788	-0.102396	-0.17217	0.553069	-0.834818	-0.765559	-0.304145	-0.417462	-0.482322	-0.500455	-0.178146	-0.72207	-1.05219	-0.285249	0.131468
TCGA-HZ-8637-01A-11R-2404-07	1.62823	1.97015	1.81363	1.1584	0.740389	1.48933	1.67595	1.33915	1.62803	1.09974	1.77671	1.67407	1.41795	-0.336819	0.5149	1.41347	0.858106	-0.240279	0.59557	1.10159	1.43437	0.801055	1.61768	1.83347	1.34202	0.593091	1.61757	0.455253	0.199282
TCGA-3A-A9I7-01A-21R-A38C-07	1.08967	-0.0307608	0.496153	0.465297	0.587084	0.620594	0.772166	1.35427	1.00483	0.198149	0.203886	0.508811	0.565057	0.275942	-0.0715195	-0.0551886	0.0534077	0.983053	-0.215875	-0.443214	0.11052	-0.172774	0.135538	0.267025	0.334756	0.115435	0.544196	-0.120914	0.275519
TCGA-FB-AAPU-01A-31R-A41B-07	-0.42763	0.0786328	-1.04739	-1.3197	-1.59405	-2.95697	-1.1738	-1.66589	-0.809111	-0.554403	-2.24675	-1.46316	-0.98783	-0.533795	0.133402	-0.905801	-0.677535	0.00250944	0.0289301	-1.59195	-1.48292	-1.3993	-1.80677	-0.707987	-1.77131	-1.1271	-0.626884	-1.81514	-1.31993
TCGA-IB-7888-01A-11R-2156-07	1.6303	1.05437	1.06769	0.752203	1.2473	1.21187	1.05522	0.568258	1.54148	2.29007	0.799768	1.40432	1.1815	0.589537	1.2856	0.708989	0.419108	-0.336096	1.34354	0.877959	1.14007	1.38195	1.30806	1.11042	1.47316	0.837855	1.91569	1.23184	1.10661
TCGA-S4-A8RM-01A-11R-A37L-07	-0.616149	-0.124423	-0.084591	0.048396	-1.23437	-1.02512	0.0854932	-1.72373	-0.79866	-0.832261	-1.57839	-1.2126	-0.548296	0.760868	-0.086114	-1.39115	0.0129271	-0.0808802	-0.0862748	-1.2041	-1.28284	-1.5389	-0.622554	-0.930039	-1.0884	-0.889035	-1.19416	-2.13634	-0.779693
TCGA-IB-7885-01A-11R-2156-07	0.736852	0.801229	0.607841	0.544819	1.35739	0.237521	0.507444	1.71087	0.807835	1.13215	1.16815	0.748013	1.20723	1.1644	0.778821	1.09713	-0.00867119	1.02675	0.214182	0.767394	0.947973	0.583788	0.823709	0.77592	0.555402	1.05449	1.99107	1.05566	0.736494
TCGA-FB-A78T-01A-12R-A32O-07	-0.886829	-0.516481	-0.353397	0.392763	-0.856724	-0.678324	0.176431	-0.617243	-0.882084	-2.15524	-0.078613	-0.633601	-0.255535	0.596803	-0.536348	0.487958	-0.235678	0.700146	-0.427153	-0.146144	0.0879767	-0.584092	0.57699	-0.302335	-0.586111	-0.725117	-1.25578	-1.25136	-0.653863
TCGA-2L-AAQI-01A-12R-A39D-07	-0.371638	-0.0724804	-0.844812	-0.318257	0.212193	-0.20305	-0.34583	-0.44571	-0.866104	-0.0373773	-1.11092	-0.429967	-0.265251	0.61915	-0.0449803	-0.404286	0.447698	-0.931418	-0.362607	0.062977	-0.498544	-0.728944	-0.620101	-0.571657	-0.575963	-0.398323	-0.54818	-1.33749	-0.329142
TCGA-YY-A8LH-01A-11R-A36G-07	-0.333868	-0.00814975	-0.290636	-0.39649	-1.10458	-1.63549	-0.787343	-1.30802	-0.487054	-0.458665	-1.64178	-1.50456	-1.19753	0.657606	-0.528887	-0.949261	0.749401	0.980379	-0.823177	-1.7149	-1.2771	-1.39804	-1.05756	-1.40686	-1.86681	-0.972203	-0.426099	-2.34665	-1.7752
TCGA-FB-AAQ1-01A-12R-A41B-07	-0.586555	-0.178441	-0.546038	0.114588	-0.264394	0.268952	-0.160471	0.264769	-0.728552	-0.161008	0.428527	0.0214615	-0.474611	-0.0414353	-0.116185	1.0151	-0.547803	-0.420337	-0.58998	0.42717	0.233077	-0.445791	0.339911	0.243817	0.256277	-0.456193	-1.01515	-0.876452	-0.417681
TCGA-FB-AAPP-01A-12R-A41B-07	-1.58938	-1.08097	-1.27087	-1.96644	-1.72274	-1.47508	-2.74124	-1.98732	-1.83192	-1.27874	-3.18241	-3.21181	-2.54172	0.602486	-0.613311	-2.52103	-1.82157	1.22308	-2.34282	-2.67579	-1.95999	-2.46151	-2.55056	-0.654849	-3.18141	-1.61655	-0.0660379	-0.729307	-2.88956
TCGA-HZ-8001-01A-11R-2204-07	1.20232	0.454303	1.26727	0.698776	1.40081	1.09298	0.435686	1.05258	0.927042	0.701221	0.876396	1.19703	0.839192	-0.526906	0.553695	0.569011	1.67041	-1.02219	1.17127	1.24836	1.33669	2.18687	1.1248	1.7463	1.03623	1.2956	1.40113	1.58208	1.08393
TCGA-IB-A5SP-01A-11R-A32O-07	-0.801152	-0.49849	-0.352256	-0.387011	-0.844975	-0.808404	0.029068	-0.0161683	-1.05305	-0.824272	-0.481787	-0.699273	-0.723436	0.564598	-0.506313	-0.22698	0.168641	1.80823	-0.802318	-0.934902	-0.841797	-1.0592	-0.271481	-0.390108	-0.759746	-0.522026	-0.313133	-0.846988	-1.2279
TCGA-HZ-7289-01A-11R-2156-07	-1.5832	-0.95397	-0.929187	-1.44972	-1.23834	-1.24627	-2.43464	-1.16663	-1.65318	-0.399956	-2.35395	-1.88042	-1.67944	1.20298	-0.262786	-1.19224	-0.0682653	1.70421	-1.87598	-2.24059	-0.817146	-1.60934	-2.01508	1.00566	-1.89672	-0.500084	0.598992	-0.940215	-1.74863
TCGA-FB-A5VM-01A-11R-A32O-07	0.790027	1.30424	0.894746	0.0790964	-0.453622	0.474592	0.485887	0.61336	0.542699	-0.346238	0.469313	0.505359	0.567866	-0.637157	0.381967	-0.141629	1.62755	0.224609	0.426435	0.379489	1.09499	0.686784	0.672329	0.668974	0.0840199	0.105528	0.329925	0.61672	0.326771
TCGA-XD-AAUH-01A-42R-A41B-07	1.67913	0.351854	1.15106	0.425809	0.00125511	0.670657	0.432372	-0.132644	1.6448	0.363638	0.101612	0.996882	0.832296	-0.836454	-0.27365	0.25183	0.210478	-1.48574	2.55322	0.719486	0.572595	1.25035	0.508031	0.971042	0.666747	0.735866	-0.735092	0.485928	0.945733
TCGA-HZ-7923-01A-12R-2156-07	0.859839	0.459927	1.10721	0.769656	1.03934	1.93124	1.09877	0.893567	0.917124	1.19927	1.4721	1.12086	1.19918	-0.58821	0.758379	1.2312	0.896219	-0.633276	1.91648	2.07012	1.54018	1.50539	1.45035	1.29462	1.35975	0.380061	0.910676	1.40991	1.16211
TCGA-IB-AAUW-01A-12R-A38C-07	0.968959	-0.55106	0.266976	0.140563	0.416559	0.0622028	0.549863	0.439741	0.753226	0.286512	-0.0233113	0.205369	0.442113	0.560013	-0.346351	0.241352	0.19108	-0.72391	1.18964	0.935085	0.437917	0.842769	0.298723	0.349738	0.21521	-0.178262	1.14537	0.883563	0.603904
TCGA-3A-A9IV-01A-11R-A41B-07	-1.73284	-2.31715	-1.97596	-3.10346	-1.1598	-0.39253	-2.33119	-1.99777	-1.55249	0.169113	-1.40777	-1.7894	-2.62906	-1.86321	-2.16113	-2.33774	-3.0201	-1.11172	-0.416307	-2.34576	-2.50294	-1.95425	-2.29866	0.324759	-1.81494	-2.44138	-0.884239	-1.43013	-0.859993
TCGA-IB-AAUQ-01A-22R-A41I-07	-0.696484	-0.342664	-0.862216	0.0968352	0.170269	-0.0118466	-0.356852	-0.341739	-0.763343	-0.599236	-0.123909	-0.493659	-0.32394	-0.452064	-0.0673513	0.0406225	0.232182	0.3864	-0.241745	-0.11613	-0.280121	-0.446417	-0.389253	-0.772	0.147827	-0.470027	-1.21956	-0.577054	0.433422
TCGA-2J-AABT-01A-11R-A41B-07	-0.298401	-0.0368514	-0.122363	0.136187	0.409725	1.18333	0.483755	0.74577	0.17166	-0.259306	0.698329	0.623836	0.772175	-0.0387986	1.02855	0.368025	-0.832627	0.500046	0.546208	0.357533	0.816819	0.475581	0.780708	0.433509	1.23694	0.448999	0.691043	1.23388	0.327447
TCGA-F2-A44G-01A-11R-A26U-07	-0.963256	0.383422	-0.930767	0.11249	0.548693	-0.25391	-0.471147	0.820418	-0.626109	0.525086	0.364522	-0.396702	0.000699259	-0.0153574	0.63793	0.35703	-0.119847	0.818792	-0.32492	-0.0509632	0.169327	-0.661161	0.184345	-0.449361	-0.288467	-0.110172	1.28825	0.176337	0.0583825
TCGA-2J-AABO-01A-21R-A41B-07	0.0556007	-0.558776	-0.20437	0.182408	-0.0799301	0.139463	-0.361957	-0.582823	-0.195222	0.747046	-0.427796	-0.00727969	0.0309235	0.0243321	0.0907813	-0.503222	0.284602	0.52722	-1.08538	-0.487251	-0.476107	0.159892	-0.58444	-0.932269	0.01628	0.167166	-0.872049	-0.231671	0.551747
TCGA-IB-7897-01A-21R-2204-07	0.662948	0.847625	1.26203	0.632583	0.937741	1.56811	1.25114	1.03279	0.86773	1.60215	1.08376	1.20008	1.01082	-0.500407	1.08055	0.734812	0.267894	-1.74451	2.37398	1.58074	0.869126	1.74749	1.03818	0.312561	1.44298	0.691273	1.14668	1.28489	1.051
TCGA-HZ-7922-01A-11R-2156-07	0.584607	0.602544	-0.0207916	0.581504	0.818833	-0.176859	0.285018	0.142722	0.694079	1.85962	0.614674	0.582487	0.626707	0.479475	1.12761	0.232253	0.148023	-0.286351	-0.0900796	0.349359	0.498899	0.596395	0.299103	0.359762	0.656932	0.226602	0.728645	1.30011	0.88399
TCGA-HV-A5A5-01A-11R-A26U-07	-0.17852	-0.107329	0.0194047	0.603838	0.404539	-0.269072	0.280175	0.089358	-0.173299	-0.765381	0.341923	0.547118	0.154398	1.41595	0.293455	1.06997	0.340749	0.227391	-0.0105786	1.27222	0.116051	-0.585082	0.405193	0.120446	0.310961	0.0865549	0.738901	0.127126	0.164011
TCGA-HZ-8005-01A-11R-2204-07	-0.943529	0.573259	0.0220446	0.334283	0.933374	0.602736	0.663222	1.02945	0.00811742	-0.24834	0.992213	0.635448	0.369773	-0.578374	0.461393	0.0999924	0.0590912	0.52096	-1.65007	-0.254314	-0.186668	0.0999039	0.47292	-0.732987	0.435872	1.23213	-0.464044	0.113643	0.497279
TCGA-FB-A7DR-01A-21R-A33R-07	-0.560963	-0.371163	-0.126314	-0.00252221	1.31669	0.600069	-0.038177	0.617134	-0.304858	-0.944537	0.218836	-0.0493436	0.58837	-0.198214	1.06859	-0.294212	0.0926345	0.497597	0.207034	0.653618	0.361967	0.545992	0.182492	-0.15722	0.827734	1.11903	0.960258	0.569863	0.715234
TCGA-FB-A4P5-01A-11R-A26U-07	1.71603	1.10436	1.96475	0.928912	0.152397	0.562821	1.67915	0.812417	1.66294	1.34668	1.32568	1.09986	1.25813	-0.914316	0.2701	0.927296	0.603429	-0.0383016	0.976023	0.292616	1.05029	0.650455	1.28668	1.03614	0.817161	0.965948	-0.334399	0.934792	0.789568
TCGA-IB-A6UF-01A-23R-A33R-07	-1.22602	-0.693234	-1.51235	-0.271735	-0.751959	-0.894391	-0.205055	-1.64283	-1.2777	-0.844414	-0.959064	-1.0515	-1.03555	-0.686503	-1.25711	-0.757581	-0.341442	-0.2797	-0.838128	-0.208185	-0.99225	-0.297979	-0.414314	-1.58838	-0.912185	-0.809536	-0.552345	-0.621758	-0.374868
TCGA-2L-AAQM-01A-11R-A39D-07	-1.74736	-3.27118	-0.570702	-2.55222	-2.54369	-1.08957	-1.92735	-1.89722	-1.5635	-2.16061	-1.8805	-1.67135	-2.18984	-2.33903	-2.44082	-2.95657	-3.70349	2.8915	-2.10551	-3.40488	-2.71773	-1.26448	-1.73188	-0.0592242	-1.73051	-2.10822	-0.412144	-1.22531	-2.33123
TCGA-IB-7886-01A-11R-2156-07	-0.134787	0.857313	0.370436	0.290417	0.848149	0.376908	0.719185	0.912221	0.13841	0.285396	0.188037	0.617678	0.568943	0.361643	1.19787	-0.280138	0.334431	0.219218	0.737079	0.245316	0.274383	0.614012	0.530567	0.0640966	0.405229	0.906986	1.26299	-0.0147035	0.279091
TCGA-HZ-A4BK-01A-11R-A26U-07	0.222632	-0.0537955	0.515738	0.812598	-0.101876	0.121846	0.345701	-0.0429869	0.0586672	-0.0110918	0.392295	0.446788	0.579713	1.29216	0.235398	0.563974	0.654399	0.602061	-0.382098	0.530029	0.762142	0.254706	0.498293	0.678885	0.336637	0.453969	0.00292186	-0.049594	0.133152
TCGA-3E-AAAZ-01A-11R-A38C-07	-0.313728	-0.488689	-0.63084	0.285069	0.020643	0.238332	-0.749183	0.181312	-0.555731	-0.583514	-0.637221	-0.667808	-0.305946	-0.894409	0.80866	-1.13298	-0.471579	-0.664288	-0.197322	-0.355745	-0.621135	-0.162663	-0.722497	-1.80152	-0.0415031	-0.372852	-0.530179	-0.293093	0.25648
TCGA-IB-AAUR-01A-21R-A38C-07	2.4488	1.03711	2.10342	1.0613	0.261204	1.84894	1.81094	0.446358	2.7261	2.01355	0.963291	1.58203	1.56337	-0.250192	0.376905	1.11931	0.683724	-0.188875	1.95494	0.190473	1.22902	1.55815	1.43241	2.02786	0.857442	1.26706	0.134413	1.27083	0.889813
TCGA-2J-AABA-01A-21R-A41B-07	0.197092	0.0438333	-0.205753	0.0250783	0.17461	0.110638	-0.182863	0.356387	-0.124367	1.1299	-0.738494	-0.703441	0.317375	-1.03234	0.156293	-0.273093	0.276676	-0.294022	-0.285387	-0.373281	-0.447644	-0.0547962	-0.767348	0.21573	0.21305	-0.529207	-0.68325	0.170549	0.867982
TCGA-2J-AABU-01A-11R-A41B-07	0.335518	0.373016	0.411881	0.377315	-0.134833	0.0860282	0.00620067	0.534159	0.189298	0.771686	-0.223051	0.199076	0.234536	0.255912	0.440182	-0.0644295	-0.554579	0.110366	0.377749	-0.151033	-0.415877	0.011653	-0.371334	-0.831124	0.121771	0.781321	-0.0337096	-0.14522	0.0968604
TCGA-F2-6880-01A-11R-2156-07	-1.22955	-3.02485	-1.34834	-2.07469	-1.21322	-0.664475	-1.67474	-1.51798	-1.20861	-2.14449	-1.84766	-1.01171	-1.64268	-0.226847	-2.45651	-1.75357	-0.756693	-1.12377	-0.4113	0.188943	-1.78046	-0.391397	-2.10417	-1.38916	-1.38464	-1.53396	-1.58179	-0.26887	-1.13426
TCGA-IB-AAUO-01A-12R-A38C-07	-0.76787	0.265776	0.155798	0.176897	-0.173554	-1.39949	-0.132174	-0.599083	-0.483994	-0.288496	-0.404724	-0.209478	-0.0955569	0.860958	-0.72059	0.2434	-0.727128	0.541333	-1.24923	-0.564654	-0.244907	-1.71945	0.204019	-0.988673	0.0689955	-0.578044	0.0293947	-1.64208	-0.474221
TCGA-2J-AABI-01A-12R-A41B-07	0.863288	0.50492	0.27699	-0.266896	-1.46393	-0.647724	0.198758	-0.966383	0.768452	-0.536318	-0.0311218	-0.685575	-0.335266	-2.12915	-0.645979	0.0925752	-1.06022	-1.43845	-0.641654	-0.822909	-0.563475	-0.997843	0.253068	-0.767888	-0.370785	-0.19284	-0.691229	-0.290914	-0.313651
TCGA-2J-AABE-01A-12R-A41B-07	-0.219051	-0.657484	-1.04406	0.445418	0.202029	0.140611	-0.63841	0.129778	-0.0587442	0.322453	0.278181	-0.0629952	0.225522	0.693668	-0.0239082	0.598863	-0.0551588	1.07779	0.286133	-0.108731	0.517871	0.30275	0.362903	-0.420575	0.237646	0.145775	0.27941	0.411772	0.239171
TCGA-FB-A4P6-01A-12R-A26U-07	0.0267621	-0.48087	0.181822	0.525405	0.0909332	0.673292	0.170648	-0.333664	-0.114345	-0.215958	-0.0471665	0.149703	0.202858	0.923251	-0.581483	0.0526418	0.0305772	-0.816724	0.123984	0.660622	0.406522	0.356057	0.209285	0.2964	0.484965	-0.0395141	-0.764402	0.218694	0.523491
TCGA-HZ-A8P0-01A-11R-A36G-07	-0.146539	-0.794899	-0.638507	-0.361884	-0.0605743	-0.56146	-0.607489	-1.24309	-0.317144	-1.74729	-0.807436	-0.270364	-0.35373	0.566037	-0.225966	-0.0346881	0.189456	0.502506	-1.80717	0.142166	-0.456608	-1.19284	-0.179415	-0.973178	-0.0193091	-0.570404	0.269471	-0.519176	0.245088
TCGA-S4-A8RP-01A-11R-A36G-07	-0.314049	-0.4452	-0.196132	0.129715	-0.0281376	-0.845465	0.637883	0.417289	-0.555667	-0.774442	-0.0374255	-0.29051	-0.332233	0.439937	-0.34711	-0.0426267	-0.523307	-0.295725	-0.735317	-0.0936342	0.0201684	-0.298971	0.0527314	-0.560627	-0.187457	-0.393746	-0.843427	-0.326897	0.161711
TCGA-XD-AAUL-01A-21R-A39D-07	-0.62145	-0.28693	-0.469703	0.526329	0.33025	0.220058	-0.226504	0.803571	-0.539477	-0.0319766	0.769654	-0.134537	-0.0435408	0.227585	0.223363	0.354154	-0.123583	0.999684	-0.396127	0.490973	0.659376	0.00941192	0.237868	0.881716	0.563745	0.436365	1.44338	0.26965	0.241089
TCGA-HZ-A77P-01A-11R-A33R-07	-0.638407	-0.784281	0.236926	0.350664	0.375874	1.68599	0.58217	0.7567	-0.526909	-1.10443	0.440662	0.20665	0.41935	-0.0801104	0.837337	-0.0716011	-0.327919	-0.151625	-0.197333	0.664875	0.487503	0.890247	0.403486	0.0338054	0.717095	0.276311	-0.0384284	1.60187	0.737427
TCGA-US-A77J-01A-11R-A32O-07	2.28579	1.11851	1.77274	0.828103	-0.0263239	0.826245	1.68473	0.455531	2.33991	1.24507	1.21752	1.38185	1.17264	0.0222646	0.415849	1.18883	0.611264	0.0514582	2.10293	0.655874	1.08012	0.976865	1.18152	1.9392	0.873268	1.21541	-0.550288	0.77622	0.6388
TCGA-2L-AAQJ-01A-12R-A39D-07	1.01006	0.372514	0.421477	0.403761	-0.31616	-0.930127	0.137099	-0.0492688	0.936782	0.423283	0.0485183	0.120687	0.513044	1.10443	0.571914	0.338262	-0.448455	1.3151	0.563148	-0.693366	-0.02433	-0.36431	-0.0833777	-0.107482	0.0370886	0.150901	0.26614	0.235624	-0.105399
TCGA-HV-A5A4-01A-11R-A26U-07	-0.391647	-0.244888	-0.249473	-0.000545986	0.236289	-1.96478	-0.279693	-0.617422	-0.617752	-0.180884	-0.278283	0.0829254	-0.137935	0.353152	-0.0266916	0.137258	0.122248	0.556188	-0.31038	-0.298349	-0.457045	-0.920746	-0.0608074	-0.839877	-0.150204	0.263494	-1.18463	-0.72087	0.206187
TCGA-US-A77E-01A-11R-A32O-07	-0.359664	-0.702972	-1.10963	0.0770901	0.32313	-0.49324	-0.384179	-0.440974	-0.503366	-1.54525	-0.556681	-1.47115	-0.704356	0.538462	-0.597289	-0.315267	-0.634661	1.01241	-1.294	-0.515917	-0.468587	-1.17355	-0.844199	-0.805387	-0.589949	-0.679701	-0.0117468	-0.584592	0.325048
TCGA-IB-7644-01A-11R-2156-07	-0.588335	0.261459	0.0814569	-0.0836769	0.661981	-0.0889489	0.374351	0.810056	-0.638405	0.630963	0.0550064	0.313	0.0646948	1.22817	0.987908	0.13516	0.09519	0.155209	-0.360455	-0.0841926	-0.0618266	0.364957	0.0355812	-0.368924	0.144985	0.534057	0.825955	-0.127703	-0.0867301
TCGA-HZ-A49I-01A-12R-A26U-07	0.401576	-0.355774	0.258403	0.635017	-0.46445	0.429538	0.761308	0.184888	0.339485	-0.738213	0.60151	0.860185	0.543746	0.496798	-0.586384	1.17575	-0.278573	1.49406	0.758437	1.09453	1.31611	0.364634	0.706538	1.20966	0.494233	0.11006	-0.0317692	0.421545	0.170139
TCGA-S4-A8RO-01A-12R-A37L-07	-0.95505	1.00549	-0.504928	-0.275497	-0.208955	-0.372744	-0.18162	-0.10221	-0.689829	-0.614664	-0.000372211	-0.392977	-0.734369	-1.3061	0.00286299	0.121029	-0.868407	0.670844	-1.38122	-0.0317118	0.104585	-0.259691	-0.404389	-0.884476	-0.955233	-0.344815	-1.70693	-1.54271	-0.593695
TCGA-F2-A44H-01A-11R-A26U-07	-0.380717	-0.0468022	-0.354762	0.406049	0.409888	1.53375	0.291847	1.13509	-0.224721	0.60694	1.13703	0.707683	0.717732	1.02632	0.304989	1.35275	0.887145	1.66348	0.0899317	1.08117	0.894969	0.711521	0.746888	0.779991	0.832096	0.567596	0.170498	0.671674	0.609054
TCGA-IB-7890-01A-12R-2204-07	-0.198776	-0.506865	-1.23342	0.520883	1.11799	1.10389	0.159334	0.215981	-0.142315	0.134803	0.781275	0.677072	-0.0249354	-1.21104	0.639023	-0.0175737	0.194299	-0.784457	0.186254	0.441001	0.100224	0.799891	0.196228	-1.05473	0.652183	0.27376	-0.184247	-0.0249453	0.868352
TCGA-HZ-A77O-01A-11R-A33R-07	-0.535067	-0.0551895	-0.502986	-0.0136869	-0.0696776	-0.869788	-0.581736	0.583327	-0.843789	-1.04928	0.0454834	-0.630391	-0.351497	-0.0363777	-0.185836	0.150061	-0.172697	0.0200662	-1.20656	-0.0672628	-0.150759	-0.436071	-0.245851	-1.22607	0.234498	-0.423814	-0.848511	-0.894773	-0.372933
TCGA-HZ-8636-01A-21R-2404-07	-0.381232	0.49718	-0.359137	0.748624	0.892211	0.382229	0.196576	0.393897	-0.0689342	0.807163	1.29463	0.882825	0.426537	0.735817	0.460026	0.715723	-0.408297	0.66073	-0.189355	0.391034	0.182834	0.79584	0.68978	-0.00652123	0.508371	0.0895153	0.384792	0.524273	0.519285
TCGA-3A-A9IB-01A-21R-A39D-07	-0.980863	0.256252	-0.348732	0.413525	0.623398	-0.867921	0.350672	1.0399	-0.586271	-0.311217	0.846771	0.297257	0.395696	-0.152757	0.619576	-0.0467677	0.318448	0.923488	-0.141218	0.0220215	0.484199	0.956456	0.350179	-0.31463	0.611569	0.325138	-0.897467	0.701314	0.64948
TCGA-2J-AABH-01A-21R-A41B-07	-0.559	-0.485738	-0.953146	0.105099	0.00748041	-0.792448	0.178825	-0.634828	-0.730932	-0.649005	-0.355091	-0.221076	-0.575081	0.684587	-0.315219	0.27482	-0.264567	-0.440464	-0.4256	0.559403	-0.448046	-0.19484	-0.278186	-0.777512	0.179747	-0.489485	0.158609	-0.962082	-0.252187
TCGA-RL-AAAS-01A-32R-A39D-07	1.45658	0.204623	1.65246	0.640898	0.350708	0.802506	1.22229	0.517243	1.30061	0.644045	0.872967	0.920052	1.10044	0.955147	0.705507	0.673148	0.857836	-0.154692	0.587291	0.611531	1.11123	1.38778	0.90108	1.34935	1.07096	0.91167	-0.440357	0.566447	0.824961
TCGA-XN-A8T3-01A-11R-A36G-07	-0.597494	-0.00521835	0.324534	0.185027	-1.04535	-0.238001	-0.056347	-0.659983	-0.7188	0.849454	-0.524345	-0.269578	-0.181472	-0.957581	-0.103029	-0.379807	0.0377196	-1.16972	-0.485366	-0.255181	-0.251854	-0.444746	-0.311421	-0.664774	0.401906	-0.443028	-2.18696	-0.567118	0.378019
TCGA-FB-AAQ0-01A-31R-A41B-07	-1.85233	-1.12314	-1.46442	-0.672684	-0.482643	-1.66037	-1.75011	-1.54174	-1.8687	-0.208186	-1.58433	-1.73253	-1.72912	-0.176851	-1.12448	-1.54134	0.27106	0.305203	-1.27144	-1.99404	-2.19642	-1.81968	-1.71935	-2.12627	-1.55878	-0.623196	-0.994078	-1.90987	-0.782282
TCGA-HZ-7925-01A-11R-2156-07	-0.775546	0.280687	-0.369059	0.587266	1.81766	1.52156	0.174633	0.874912	-0.20857	1.18122	0.552818	0.616419	0.435688	-0.358217	1.48064	0.595567	0.659595	-0.1146	0.699221	0.5429	0.686616	0.865409	0.4177	0.0702522	0.620411	0.646633	1.89577	1.29977	1.20482
TCGA-Q3-A5QY-01A-12R-A32O-07	2.55689	1.64296	2.08593	1.28116	-0.264251	1.28208	1.65367	1.07168	2.83959	2.06885	1.23955	1.63109	1.4606	-1.31703	0.680316	1.46223	-0.323473	0.194728	2.2209	-0.337475	1.03358	0.479946	1.47669	2.37084	0.808081	1.28535	-0.347866	0.703176	0.376994
TCGA-IB-AAUV-01A-11R-A38C-07	1.25319	-0.119332	1.36055	0.517595	0.386125	1.80976	1.07756	1.25246	1.19438	0.723576	1.10017	1.10156	1.27096	-1.79655	-0.337673	0.467497	0.186572	-1.78861	0.815976	0.896448	1.17751	1.64875	1.31467	0.920775	1.04759	0.762263	0.973212	1.76401	1.34612
TCGA-HZ-A49H-01A-11R-A26U-07	0.681427	0.724912	1.33097	0.689422	0.603902	0.879746	0.658699	0.346226	0.436953	-0.584038	0.447397	0.819501	0.963473	1.0372	0.8178	0.602371	0.982689	0.18499	1.85234	1.04327	0.789058	1.56024	0.902175	0.841213	0.885461	0.789553	1.63221	0.951847	0.819193
TCGA-PZ-A5RE-01A-11R-A32O-07	-0.465614	0.0622321	-0.237815	0.416606	1.00038	0.324958	0.763108	1.13615	-0.0616932	0.498387	0.673724	0.750479	0.103304	0.977525	0.400376	0.827395	0.313162	1.73542	0.410453	0.854049	1.00869	0.442431	0.64406	0.0782805	0.185383	0.454183	1.47438	1.41708	0.0996549
TCGA-HZ-7918-01A-11R-2156-07	1.03289	1.45819	1.91766	0.755775	1.34824	1.62596	1.06319	0.689242	0.836446	1.18408	1.22274	1.02885	1.15277	0.619153	0.885958	1.16883	0.561553	0.0590566	0.190216	1.0876	0.875387	1.09184	1.16688	0.721592	1.32811	1.94457	0.116706	0.300593	0.431235
TCGA-F2-6879-01A-11R-2156-07	-1.91485	0.316906	-0.699542	0.142874	0.54123	0.258039	-0.620264	0.142972	-0.903899	1.85711	0.0591272	-0.243405	-0.483186	-0.236046	0.915907	-0.572232	0.57289	0.806337	-0.662229	-0.654231	-0.782145	0.205224	-0.0986745	-1.05525	-0.18736	-0.177921	0.582881	-0.121192	-0.0530158

## Sheet: Table S3
Patient	AJCC_stage	Grade	TOO	Stage	gender	States	TMEgroup
TCGA-FB-AAPS-01A-12R-A39D-07	stage iib_n1	G3	HP	IIB	female	0	Group1
TCGA-FB-AAQ3-01A-11R-A41B-07	stage iib_n1	G2	HP	IIB	female	1	Group2
TCGA-IB-AAUU-01A-11R-A37L-07	stage iib_n1	G3	HP	IIB	male	0	Group2
TCGA-H6-A45N-11A-12R-A26U-07			TP	IIB	female	1	Group1
TCGA-OE-A75W-01A-12R-A32O-07	stage ia.ib.iia_n0	G3	TP	IIA	male	1	Group2
TCGA-3A-A9IO-01A-11R-A38C-07			BP		male	0	Group3
TCGA-IB-AAUM-01A-11R-A37L-07	stage iib_n1	G2	HP	IIB	male	0	Group2
TCGA-IB-7649-01A-11R-2156-07	stage iib_n1	G3	HP	IIB	female	1	Group1
TCGA-IB-A7LX-01A-12R-A36G-07	stage iib_n1	G3	HP	IIB	male	1	Group2
TCGA-HZ-8317-01A-11R-2404-07	stage iib_n1	G2	HP	IIB	female	1	Group2
TCGA-3A-A9IH-01A-12R-A39D-07	stage ia.ib.iia_n0	G1	BP	IA	female	0	Group2
TCGA-IB-A6UG-01A-32R-A33R-07	stage iib_n1	G3	HP	IIB	male	1	Group2
TCGA-3A-A9J0-01A-11R-A41B-07	stage iib_n1	G1	HP	IIB	male	0	Group2
TCGA-XD-AAUG-01A-61R-A41B-07	stage iv	G3	BP	IV	female	0	Group2
TCGA-2J-AABV-01A-12R-A41B-07	stage iib_n1	G2	HP	IIB	male	1	Group2
TCGA-HZ-7926-01A-11R-2156-07	stage iib_n1	G2	HP	IIB	male	1	Group2
TCGA-2J-AAB8-01A-12R-A41B-07	stage iib_n1	G2	HP	IIB	male	0	Group2
TCGA-YB-A89D-11A-11R-A36G-07			BP	IIB	male	0	Group1
TCGA-XN-A8T5-01A-12R-A36G-07	stage ia.ib.iia_n0	G3	HP	IB	female	0	Group1
TCGA-HZ-A9TJ-06A-11R-A41B-07			TP	IV	male	0	Group2
TCGA-IB-7645-01A-22R-2204-07	stage iib_n1	G2	HP	IIB	female	1	Group1
TCGA-3A-A9IL-01A-11R-A38C-07			BP	I	female	0	Group3
TCGA-IB-A5SO-01A-11R-A32O-07	stage iib_n1	G2	HP	IIB	male	1	Group1
TCGA-3A-A9I5-01A-11R-A38C-07		G2	HP		male	0	Group2
TCGA-2L-AAQA-01A-21R-A38C-07	stage iib_n1	G2	NOS	IIB	male	1	Group2
TCGA-F2-7276-01A-11R-2156-07			NOS	IIB	male	1	Group1
TCGA-RB-A7B8-01A-12R-A33R-07	stage iib_n1	G2	HP	IIB	female	1	Group2
TCGA-2J-AAB9-01A-11R-A41B-07	stage iib_n1	G2	HP	IIB	female	1	Group2
TCGA-IB-7646-01A-11R-2156-07	stage iib_n1	G3	HP	IIB	male	1	Group1
TCGA-HV-A5A3-01A-11R-A26U-07	stage ia.ib.iia_n0	G2	BP	IIA	male	1	Group2
TCGA-HZ-7920-01A-11R-2204-07			HP	IB	male	1	Group1
TCGA-IB-7654-01A-11R-2156-07			HP	IIB	male	1	Group2
TCGA-HV-A5A6-01A-11R-A26U-07	stage iib_n1	G2	HP	IIB	female	1	Group2
TCGA-2J-AABP-01A-11R-A41B-07			TP	IIB	female	0	Group1
TCGA-IB-7891-01A-11R-2204-07	stage iib_n1	G2	NOS	IIB	female	1	Group1
TCGA-3A-A9IS-01A-21R-A39D-07			BP	IB	male	0	Group3
TCGA-IB-AAUT-01A-11R-A37L-07	stage iib_n1	G4	HP	IIB	male	0	Group1
TCGA-XD-AAUI-01A-42R-A41B-07	stage iib_n1	G3	HP	IIB	female	1	Group1
TCGA-IB-8127-01A-11R-2404-07	stage iib_n1	G2	HP	IIB	male	0	Group1
TCGA-FB-AAPY-01A-11R-A41B-07	stage iib_n1	G2	HP	IIB	male	1	Group1
TCGA-IB-A5ST-01A-11R-A32O-07	stage iib_n1	G2	HP	IIB	female	0	Group1
TCGA-IB-AAUP-01A-11R-A37L-07	stage iib_n1	G2	HP	IIB	male	0	Group1
TCGA-IB-A5SS-01A-11R-A32O-07	stage iib_n1	G3	TP	IIB	female	1	Group1
TCGA-3A-A9IJ-01A-11R-A39D-07			HP	IB	male	0	Group3
TCGA-3A-A9IR-01A-11R-A38C-07			TP	IB	female	0	Group3
TCGA-HZ-A4BH-01A-11R-A26U-07	stage iib_n1	G3	HP	IIB	male	0	Group1
TCGA-LB-A9Q5-01A-11R-A39D-07	stage iib_n1	G3	HP	IIB	female	1	Group1
TCGA-2L-AAQE-01A-11R-A39D-07	stage iib_n1	G3	HP	IIB	male	1	Group2
TCGA-Q3-AA2A-01A-11R-A37L-07	stage ia.ib.iia_n0	G2	HP	IB	female	0	Group2
TCGA-FB-AAQ6-01A-11R-A41B-07	stage ia.ib.iia_n0	G2	TP	IA	male	1	Group2
TCGA-M8-A5N4-01A-11R-A26U-07	stage ia.ib.iia_n0	G3	HP	IIA	female	0	Group2
TCGA-H6-8124-01A-11R-2404-07	stage iib_n1	G3	HP	IIB	female	0	Group2
TCGA-IB-A5SQ-01A-11R-A32O-07	stage ia.ib.iia_n0	G3	HP	IB	female	1	Group1
TCGA-IB-7652-01A-11R-2156-07	stage iib_n1	G2	NOS	IIB	female	0	Group1
TCGA-HZ-8315-01A-11R-2404-07	stage ia.ib.iia_n0	G2	HP	IIA	female	1	Group1
TCGA-HV-A7OL-01A-11R-A33R-07	stage ia.ib.iia_n0	G2	HP	IIA	male	0	Group1
TCGA-HZ-A49G-01A-11R-A26U-07	stage iib_n1	G3	HP	IIB	female	0	Group1
TCGA-2J-AAB6-01A-11R-A41B-07	stage ia.ib.iia_n0	G3	BP	IIA	male	1	Group2
TCGA-HZ-A8P1-01A-11R-A37L-07	stage ia.ib.iia_n0	G2	TP	IB	male	0	Group3
TCGA-3A-A9I9-01A-11R-A38C-07	stage ia.ib.iia_n0	G3	HP	IIA	male	1	Group2
TCGA-HZ-8519-01A-11R-2404-07	stage ia.ib.iia_n0	G3	HP	IA	male	0	Group1
TCGA-FB-AAPZ-01A-11R-A41B-07	stage iib_n1	G2	HP	IIB	male	0	Group1
TCGA-2J-AABK-01A-31R-A41B-07	stage iib_n1	G2	HP	IIB	male	0	Group2
TCGA-HV-A7OP-01A-11R-A33R-07			HP	IIB	male	0	Group3
TCGA-HV-AA8X-01A-11R-A39D-07	stage iib_n1	G1	BP	IIB	female	1	Group2
TCGA-US-A779-01A-11R-A32O-07	stage iib_n1	G2	HP	IIB	female	1	Group3
TCGA-3A-A9IN-01A-11R-A39D-07			BP	IB	female	0	Group3
TCGA-F2-7273-01A-11R-2156-07			NOS	IIB	male	1	Group1
TCGA-HZ-8003-01A-21R-2204-07	stage iib_n1	G2	HP	IIB	female	1	Group1
TCGA-3A-A9IC-01A-11R-A38C-07	stage iib_n1	G2	HP	IIB	female	1	Group2
TCGA-IB-8126-01A-11R-2404-07	stage iii	G2	HP	III	female	0	Group1
TCGA-2J-AAB4-01A-12R-A41B-07	stage iib_n1	G2	OP	IIB	male	0	Group2
TCGA-HZ-8638-01A-11R-2404-07			HP	IA	female	1	Group2
TCGA-IB-AAUN-01A-12R-A38C-07	stage ia.ib.iia_n0	G3	HP	IB	female	1	Group2
TCGA-US-A774-01A-21R-A32O-07	stage iib_n1	G2	HP	IIB	female	1	Group1
TCGA-IB-AAUS-01A-12R-A38C-07	stage iib_n1	G2	HP	IIB	female	0	Group1
TCGA-IB-7651-01A-11R-2156-07	stage iib_n1	G3	HP	IIB	female	1	Group1
TCGA-2J-AAB1-01A-11R-A41B-07	stage iib_n1	G2	HP	IIB	male	1	Group2
TCGA-3E-AAAY-01A-11R-A38C-07	stage iib_n1	G2	BP	IIB	male	0	Group1
TCGA-IB-7893-01A-11R-2204-07	stage ia.ib.iia_n0	G3	NOS	IIA	male	1	Group2
TCGA-2L-AAQL-01A-11R-A38C-07	stage iib_n1	G3	HP	IIB	male	1	Group2
TCGA-LB-A7SX-01A-11R-A33R-07	stage iib_n1	G2	HP	IIB	female	1	Group3
TCGA-IB-7887-01A-11R-2156-07	stage iib_n1	G2	NOS	IIB	female	1	Group2
TCGA-HZ-8002-01A-11R-2204-07	stage iib_n1	G3	HP	IIB	male	1	Group1
TCGA-FB-AAQ2-01A-31R-A41B-07	stage iib_n1	G3	HP	IIB	female	1	Group2
TCGA-3A-A9IX-01A-11R-A41B-07	stage ia.ib.iia_n0	G2	HP	IA	male	0	Group1
TCGA-F2-A8YN-01A-11R-A37L-07	stage ia.ib.iia_n0	G2	HP	IIA	male	0	Group2
TCGA-HV-AA8V-01A-11R-A41B-07	stage iib_n1	G2	HP	IIB	male	0	Group2
TCGA-L1-A7W4-01A-12R-A36G-07			HP	IIB	female	1	Group3
TCGA-YH-A8SY-01A-11R-A37L-07	stage iii	G2	HP		female	0	Group2
TCGA-IB-7889-01A-11R-2156-07	stage iib_n1	G2	NOS	IIB	female	1	Group1
TCGA-US-A776-01A-13R-A33R-07	stage ia.ib.iia_n0	G1	HP	IIA	male	0	Group3
TCGA-LB-A8F3-01A-11R-A36G-07	stage ia.ib.iia_n0	G3	HP	IIA	female	0	Group2
TCGA-H8-A6C1-01A-11R-A32O-07			HP	IIA	male	0	Group2
TCGA-F2-A7TX-01A-33R-A38C-07	stage iib_n1	G3	HP	IIB	male	1	Group1
TCGA-IB-A7M4-01A-11R-A36G-07	stage iib_n1	G3	BP	IIB	male	0	Group2
TCGA-3A-A9IZ-01A-12R-A41B-07	stage iib_n1	G1	HP	IIB	male	1	Group2
TCGA-HZ-7919-01A-11R-2156-07	stage iib_n1	G2	HP	IIB	female	1	Group1
TCGA-US-A77G-01A-11R-A32O-07	stage iib_n1	G2	HP	IIB	male	1	Group3
TCGA-2J-AABF-01A-31R-A41B-07	stage iib_n1	G3	HP	IIB	male	1	Group1
TCGA-HZ-7924-01A-11R-2156-07			HP	IIA	female	0	Group2
TCGA-Z5-AAPL-01A-12R-A41B-07	stage ia.ib.iia_n0	G2	NOS	IIA	female	0	Group1
TCGA-HZ-A77Q-01A-11R-A36G-07	stage iib_n1	G3	HP	IIB	female	0	Group1
TCGA-FB-A545-01A-11R-A26U-07	stage iib_n1	G3	BP	IIB	female	1	Group3
TCGA-FB-AAPQ-01A-11R-A41B-07	stage iib_n1	G2	HP	IIB	male	1	Group2
TCGA-2J-AABR-01A-11R-A41B-07	stage ia.ib.iia_n0	G2	OP	IIA	female	0	Group1
TCGA-RB-AA9M-01A-11R-A39D-07	stage iib_n1	G3	TP	IIB	male	0	Group2
TCGA-3A-A9IU-01A-11R-A39D-07	stage iib_n1	G3	HP	IIB	male	1	Group2
TCGA-HZ-8637-01A-11R-2404-07	stage iib_n1	G3	HP	IIB	female	1	Group1
TCGA-3A-A9I7-01A-21R-A38C-07	stage iib_n1	G3	HP	IIB	male	0	Group1
TCGA-FB-AAPU-01A-31R-A41B-07	stage ia.ib.iia_n0	G2	HP	IIA	female	1	Group3
TCGA-IB-7888-01A-11R-2156-07	stage ia.ib.iia_n0	G2	NOS	IIA	female	1	Group1
TCGA-S4-A8RM-01A-11R-A37L-07	stage iib_n1	G2	NOS	IIB	male	0	Group3
TCGA-IB-7885-01A-11R-2156-07	stage iib_n1	G3	NOS	IIB	female	0	Group1
TCGA-FB-A78T-01A-12R-A32O-07	stage iib_n1	G2	HP	IIB	female	1	Group2
TCGA-2L-AAQI-01A-12R-A39D-07	stage iib_n1	G3	HP	IIB	male	1	Group2
TCGA-YY-A8LH-01A-11R-A36G-07	stage iib_n1	G3	TP	IIB	female	0	Group3
TCGA-FB-AAQ1-01A-12R-A41B-07	stage iib_n1	G3	HP	IIB	male	1	Group2
TCGA-FB-AAPP-01A-12R-A41B-07			HP	IIB	male	1	Group3
TCGA-HZ-8001-01A-11R-2204-07	stage iii	G3	HP	III	male	0	Group1
TCGA-IB-A5SP-01A-11R-A32O-07	stage ia.ib.iia_n0	G2	HP	IIA	male	0	Group2
TCGA-HZ-7289-01A-11R-2156-07			HP	IIB	male	1	Group3
TCGA-FB-A5VM-01A-11R-A32O-07	stage ia.ib.iia_n0	G3	HP	IB	male	1	Group1
TCGA-XD-AAUH-01A-42R-A41B-07	stage iib_n1	G3	HP	IIB	female	0	Group1
TCGA-HZ-7923-01A-12R-2156-07			HP	IIA	male	0	Group1
TCGA-IB-AAUW-01A-12R-A38C-07			HP	IIB	female	1	Group1
TCGA-3A-A9IV-01A-11R-A41B-07			TP	IB	female	0	Group3
TCGA-IB-AAUQ-01A-22R-A41I-07	stage iib_n1	G3	TP	IIB	male	1	Group2
TCGA-2J-AABT-01A-11R-A41B-07	stage iib_n1	G2	HP	IIB	female	0	Group1
TCGA-F2-A44G-01A-11R-A26U-07	stage iib_n1	G3	HP	IIB	female	1	Group2
TCGA-2J-AABO-01A-21R-A41B-07	stage iib_n1	G3	HP	IIB	male	0	Group2
TCGA-IB-7897-01A-21R-2204-07	stage iib_n1	G2	NOS	IIB	female	1	Group1
TCGA-HZ-7922-01A-11R-2156-07	stage iib_n1	G3	HP	IIB	female	0	Group1
TCGA-HV-A5A5-01A-11R-A26U-07	stage iib_n1	G3	HP	IIB	female	0	Group2
TCGA-HZ-8005-01A-11R-2204-07	stage iib_n1	G3	NOS	IIB	male	1	Group2
TCGA-FB-A7DR-01A-21R-A33R-07			HP	IIA	male	1	Group2
TCGA-FB-A4P5-01A-11R-A26U-07	stage iib_n1	G2	HP	IIB	female	1	Group1
TCGA-IB-A6UF-01A-23R-A33R-07	stage iib_n1	G3	HP	IIB	male	0	Group2
TCGA-2L-AAQM-01A-11R-A39D-07			NOS	IIB	male	0	Group3
TCGA-IB-7886-01A-11R-2156-07	stage iib_n1	G3	NOS	IIB	male	1	Group1
TCGA-HZ-A4BK-01A-11R-A26U-07	stage iib_n1	G3	HP	IIB	male	0	Group1
TCGA-3E-AAAZ-01A-11R-A38C-07	stage ia.ib.iia_n0	G2	HP	IIA	male	1	Group2
TCGA-IB-AAUR-01A-21R-A38C-07	stage iib_n1	G2	HP	IIB	male	0	Group1
TCGA-2J-AABA-01A-21R-A41B-07	stage iib_n1	G2	HP	IIB	male	1	Group2
TCGA-2J-AABU-01A-11R-A41B-07	stage iib_n1	G3	HP	IIB	male	1	Group2
TCGA-F2-6880-01A-11R-2156-07			HP	IIB	male	0	Group3
TCGA-IB-AAUO-01A-12R-A38C-07	stage iib_n1	G3	HP	IIB	female	1	Group2
TCGA-2J-AABI-01A-12R-A41B-07	stage ia.ib.iia_n0	G3	HP	IIA	female	0	Group2
TCGA-2J-AABE-01A-12R-A41B-07	stage ia.ib.iia_n0	G2	BP	IIA	male	0	Group2
TCGA-FB-A4P6-01A-12R-A26U-07	stage iib_n1	G3	HP	IIB	male	0	Group2
TCGA-HZ-A8P0-01A-11R-A36G-07	stage iib_n1	G2	HP	IIB	male	0	Group2
TCGA-S4-A8RP-01A-11R-A36G-07	stage iib_n1	G2	HP	IIB	female	1	Group2
TCGA-XD-AAUL-01A-21R-A39D-07	stage ia.ib.iia_n0	G2	HP	IIA	male	0	Group2
TCGA-HZ-A77P-01A-11R-A33R-07	stage iib_n1	G3	HP	IIB	male	0	Group2
TCGA-US-A77J-01A-11R-A32O-07			HP	IIB	female	1	Group1
TCGA-2L-AAQJ-01A-12R-A39D-07	stage iii	G3	HP	III	female	1	Group2
TCGA-HV-A5A4-01A-11R-A26U-07	stage ia.ib.iia_n0	G2	TP	IIA	female	0	Group2
TCGA-US-A77E-01A-11R-A32O-07	stage iib_n1	G3	HP	IIB	male	1	Group2
TCGA-IB-7644-01A-11R-2156-07	stage iv	G2	HP	IV	female	1	Group2
TCGA-HZ-A49I-01A-12R-A26U-07	stage iib_n1	G2	HP	IIB	male	1	Group1
TCGA-S4-A8RO-01A-12R-A37L-07	stage iib_n1	G3	HP	IIB	female	0	Group2
TCGA-F2-A44H-01A-11R-A26U-07	stage ia.ib.iia_n0	G2	HP	IIA	male	0	Group1
TCGA-IB-7890-01A-12R-2204-07	stage ia.ib.iia_n0	G3	NOS	IB	male	1	Group2
TCGA-HZ-A77O-01A-11R-A33R-07	stage iib_n1	G3	HP	IIB	female	1	Group2
TCGA-HZ-8636-01A-21R-2404-07	stage iv	G2	TP	IV	female	1	Group1
TCGA-3A-A9IB-01A-21R-A39D-07	stage iib_n1	G3	HP	IIB	female	1	Group2
TCGA-2J-AABH-01A-21R-A41B-07	stage ia.ib.iia_n0	G2	BP	IIA	male	0	Group2
TCGA-RL-AAAS-01A-32R-A39D-07			HP	IB	female	0	Group1
TCGA-XN-A8T3-01A-11R-A36G-07	stage ia.ib.iia_n0	G2	HP	IB	male	0	Group2
TCGA-FB-AAQ0-01A-31R-A41B-07	stage ia.ib.iia_n0	G3	HP	IIA	male	1	Group3
TCGA-HZ-7925-01A-11R-2156-07	stage iib_n1	G2	HP	IIB	male	1	Group1
TCGA-Q3-A5QY-01A-12R-A32O-07	stage iib_n1	G3	HP	IIB	male	0	Group1
TCGA-IB-AAUV-01A-11R-A38C-07			HP	IIB	male	0	Group1
TCGA-HZ-A49H-01A-11R-A26U-07	stage iib_n1	G2	HP	IIB	female	0	Group1
TCGA-PZ-A5RE-01A-11R-A32O-07	stage iib_n1	G3	HP	IIB	female	1	Group1
TCGA-HZ-7918-01A-11R-2156-07			HP	IIB	male	0	Group1
TCGA-F2-6879-01A-11R-2156-07	stage iib_n1	G3	HP	IIB	male	1	Group2

## Sheet: Table S4
logFC	AveExpr	t	P.Value	adj.P.Val	B	logP	group	contrast	Gene
1.39932	2.14627	16.7044	3.00488e-38	5.175e-34	76.2884	33.2861	up	Group1-other	PLEK
1.45601	2.59797	16.1808	9.21684e-37	7.93662e-33	72.9122	32.1004	up	Group1-other	EVI2B
1.47423	2.35517	16.0469	2.22006e-36	1.27446e-32	72.045	31.8947	up	Group1-other	MPEG1
1.74053	3.71821	15.7458	1.61056e-35	6.93429e-32	70.09	31.159	up	Group1-other	CD53
1.08625	2.03989	15.6815	2.4626e-35	8.4822e-32	69.671	31.0715	up	Group1-other	IL10RA
1.11465	1.56325	15.4903	8.70269e-35	2.49796e-31	68.4253	30.6024	up	Group1-other	AOAH
1.61122	2.20836	15.2723	3.68347e-34	9.06239e-31	67.0014	30.0428	up	Group1-other	PTPRC
1.14093	1.6829	15.1846	6.5876e-34	1.41815e-30	66.4276	29.8483	up	Group1-other	NCKAP1L
1.54303	2.91075	15.0968	1.17923e-33	2.25653e-30	65.8529	29.6466	up	Group1-other	CYBB
1.27915	3.13001	14.8362	6.66083e-33	9.13755e-30	64.1439	29.0392	up	Group1-other	CD4
1.21525	2.50472	14.8198	7.42804e-33	9.13755e-30	64.0363	29.0392	up	Group1-other	MS4A6A
1.40909	2.4018	14.8029	8.31126e-33	9.54243e-30	63.9254	29.0203	up	Group1-other	SASH3
1.03177	1.3606	14.6409	2.44292e-32	2.6295e-29	62.861	28.5801	up	Group1-other	CCR5
1.33613	2.94861	14.4838	6.96133e-32	6.3099e-29	61.8272	28.2	up	Group1-other	HCLS1
1.21839	2.09256	14.2749	2.80567e-31	2.41597e-28	60.451	27.6169	up	Group1-other	MNDA
1.18124	2.97614	14.1594	6.06368e-31	4.74676e-28	59.69	27.3236	up	Group1-other	GIMAP4
1.40914	3.291	14.1072	8.59854e-31	6.08672e-28	59.3451	27.2156	up	Group1-other	RNASE6
1.18189	2.33316	14.1031	8.83567e-31	6.08672e-28	59.3183	27.2156	up	Group1-other	WAS
1.1028	2.35384	14.0851	9.96463e-31	6.35596e-28	59.1995	27.1968	up	Group1-other	ARHGAP30
1.19766	1.6477	14.0759	1.05951e-30	6.51671e-28	59.139	27.186	up	Group1-other	ITGAL
1.41347	2.396	14.0388	1.35723e-30	8.06009e-28	58.8944	27.0937	up	Group1-other	CD2
1.02852	1.39027	14.021	1.52964e-30	8.78116e-28	58.7763	27.0564	up	Group1-other	TAGAP
1.15977	1.84237	13.8507	4.77376e-30	2.56918e-27	57.6525	26.5902	up	Group1-other	CSF2RB
1.16594	3.56048	13.8336	5.35345e-30	2.79385e-27	57.5393	26.5538	up	Group1-other	SAMHD1
1.09632	2.40164	13.7476	9.518e-30	4.82114e-27	56.9711	26.3168	up	Group1-other	C1orf162
1.61697	5.44369	13.7266	1.09529e-29	5.33335e-27	56.8324	26.273	up	Group1-other	SRGN
1.22645	2.53225	13.7105	1.21968e-29	5.52773e-27	56.7262	26.2575	up	Group1-other	C3AR1
1.25849	2.33315	13.6824	1.47228e-29	6.50142e-27	56.5403	26.187	up	Group1-other	MS4A7
1.11346	2.03604	13.6557	1.75983e-29	7.39215e-27	56.3641	26.1312	up	Group1-other	EVI2A
1.33836	1.46697	13.5695	3.13334e-29	1.25494e-26	55.7944	25.9014	up	Group1-other	GZMK
1.26059	2.38614	13.5647	3.23641e-29	1.26676e-26	55.7624	25.8973	up	Group1-other	MS4A4A
1.33986	2.36868	13.4597	6.53552e-29	2.34489e-26	55.0684	25.6299	up	Group1-other	FPR3
1.12027	1.93844	13.4171	8.69126e-29	2.99501e-26	54.7869	25.5236	up	Group1-other	SLA
1.40171	2.18543	13.4171	8.69529e-29	2.99501e-26	54.7864	25.5236	up	Group1-other	CD3E
1.00378	1.39793	13.3696	1.19452e-28	3.95615e-26	54.4728	25.4027	up	Group1-other	BTK
1.08682	2.47653	13.3348	1.50845e-28	4.8425e-26	54.2423	25.3149	up	Group1-other	HCK
1.44764	1.91139	13.3338	1.51838e-28	4.8425e-26	54.2359	25.3149	up	Group1-other	CD48
1.05881	1.20338	13.2861	2.0907e-28	6.42965e-26	53.92	25.1918	up	Group1-other	IKZF1
1.54887	3.77966	13.2276	3.09329e-28	9.02928e-26	53.5331	25.0443	up	Group1-other	LCP1
1.3942	2.74746	13.2238	3.17279e-28	9.10696e-26	53.508	25.0406	up	Group1-other	FOLR2
1.00723	0.858132	13.1715	4.50164e-28	1.25044e-25	53.1625	24.9029	up	Group1-other	CCR4
1.1546	3.15657	13.1623	4.78796e-28	1.30886e-25	53.1016	24.8831	up	Group1-other	GMFG
1.43833	2.69109	13.1463	5.32842e-28	1.41179e-25	52.996	24.8502	up	Group1-other	GPR183
1.04313	0.791174	13.1202	6.34754e-28	1.65632e-25	52.8232	24.7809	up	Group1-other	P2RY10
1.12994	2.03414	13.0631	9.30515e-28	2.39184e-25	52.4454	24.6213	up	Group1-other	CYTIP
1.11999	1.61396	13.0177	1.261e-27	3.10243e-25	52.1452	24.5083	up	Group1-other	CD8A
1.01967	1.73392	13.0112	1.31677e-27	3.19401e-25	52.1025	24.4957	up	Group1-other	SAMSN1
1.07603	2.41419	12.9698	1.73743e-27	4.09892e-25	51.8287	24.3873	up	Group1-other	SLCO2B1
1.03651	2.25972	12.9567	1.89653e-27	4.41378e-25	51.7422	24.3552	up	Group1-other	CD83
1.19685	2.96035	12.8179	4.80316e-27	9.96627e-25	50.8244	24.0015	up	Group1-other	HLA-DMB
1.21766	2.41653	12.8078	5.13985e-27	1.05379e-24	50.7575	23.9772	up	Group1-other	LY86
1.21224	3.64255	12.5805	2.35366e-26	4.40595e-24	49.2548	23.356	up	Group1-other	AIF1
1.12037	1.70703	12.5415	3.05348e-26	5.53548e-24	48.9977	23.2568	up	Group1-other	RCSD1
1.20285	3.04619	12.463	5.16489e-26	9.0765e-24	48.4786	23.0421	up	Group1-other	CSF1R
1.45938	5.29663	12.4305	6.41575e-26	1.08326e-23	48.2644	22.9653	up	Group1-other	LAPTM5
1.4815	2.16857	12.3501	1.09838e-25	1.75151e-23	47.7334	22.7566	up	Group1-other	IL7R
1.1983	1.53221	12.3244	1.30434e-25	2.04213e-23	47.5637	22.6899	up	Group1-other	CD69
1.47261	3.49408	12.2285	2.47511e-25	3.64327e-23	46.9311	22.4385	up	Group1-other	CCL5
1.08269	2.38441	12.1604	3.89855e-25	5.42181e-23	46.4824	22.2659	up	Group1-other	RASSF2
1.75064	3.91959	12.1207	5.08413e-25	6.8944e-23	46.2202	22.1615	up	Group1-other	CD52
1.16002	1.23749	12.0648	7.37976e-25	9.85227e-23	45.8522	22.0065	up	Group1-other	SIT1
1.44767	1.52886	11.9725	1.36619e-24	1.71741e-22	45.244	21.7651	up	Group1-other	CCR7
1.08308	1.84508	11.9316	1.79359e-24	2.22224e-22	44.9752	21.6532	up	Group1-other	FYB1
1.39583	2.48526	11.9202	1.93492e-24	2.36335e-22	44.9003	21.6265	up	Group1-other	CD37
1.47326	4.65608	11.8996	2.22019e-24	2.69268e-22	44.7645	21.5698	up	Group1-other	HLA-DPA1
1.25903	2.72767	11.7917	4.55404e-24	5.15985e-22	44.0551	21.2874	up	Group1-other	HLA-DOA
1.0948	1.41042	11.7274	6.98653e-24	7.76271e-22	43.6325	21.11	up	Group1-other	CLEC10A
1.23576	2.59677	11.7234	7.17457e-24	7.92054e-22	43.6063	21.1012	up	Group1-other	GIMAP7
1.31186	2.88233	11.5961	1.67275e-23	1.8005e-21	42.7704	20.7446	up	Group1-other	CORO1A
1.42216	3.4006	11.4521	4.35052e-23	4.38156e-21	41.8267	20.3584	up	Group1-other	HLA-DQA1
1.12161	2.18188	11.4512	4.37791e-23	4.38351e-21	41.8205	20.3582	up	Group1-other	FPR1
1.39164	5.67307	11.4389	4.74977e-23	4.72836e-21	41.74	20.3253	up	Group1-other	HLA-DPB1
1.46746	2.23867	11.4312	4.99699e-23	4.88966e-21	41.6899	20.3107	up	Group1-other	SELL
1.15664	3.09209	11.4253	5.19824e-23	5.05786e-21	41.6509	20.296	up	Group1-other	LSP1
1.1939	2.44518	11.4088	5.79698e-23	5.60874e-21	41.5433	20.2511	up	Group1-other	FGL2
1.22905	1.63172	11.3722	7.38797e-23	7.02959e-21	41.3038	20.1531	up	Group1-other	CD27
1.3144	2.30665	11.3367	9.35071e-23	8.65796e-21	41.0712	20.0626	up	Group1-other	CD3D
1.01627	1.61151	11.3079	1.13176e-22	1.03128e-20	40.8828	19.9866	up	Group1-other	KLRB1
1.14786	2.4651	11.2773	1.38595e-22	1.24317e-20	40.6827	19.9055	up	Group1-other	CST7
1.01348	2.9512	11.2687	1.46699e-22	1.30229e-20	40.6266	19.8853	up	Group1-other	LY96
1.58639	8.15127	11.2338	1.84735e-22	1.61498e-20	40.399	19.7918	up	Group1-other	HLA-DRA
1.07125	1.53212	11.163	2.95105e-22	2.5036e-20	39.9366	19.6014	up	Group1-other	SLAMF6
1.29001	4.34394	11.0735	5.33012e-22	4.3712e-20	39.353	19.3594	up	Group1-other	FCER1G
1.46581	2.92341	11.06	5.82358e-22	4.73083e-20	39.2656	19.3251	up	Group1-other	CD163
1.46066	4.60605	11.0471	6.34224e-22	5.10402e-20	39.1814	19.2921	up	Group1-other	CXCR4
1.08323	1.98724	11.0245	7.36386e-22	5.84426e-20	39.034	19.2333	up	Group1-other	PLA2G7
1.11114	2.73786	11.0163	7.7691e-22	6.10956e-20	38.9811	19.214	up	Group1-other	CPVL
1.56057	5.63284	10.9774	1.00403e-21	7.82415e-20	38.7279	19.1066	up	Group1-other	C1QB
1.0762	3.13504	10.9288	1.38323e-21	1.05407e-19	38.4117	18.9771	up	Group1-other	SPI1
1.42724	1.94414	10.8976	1.69826e-21	1.27958e-19	38.2092	18.8929	up	Group1-other	FCMR
1.44817	5.8674	10.8973	1.70145e-21	1.27958e-19	38.2073	18.8929	up	Group1-other	C1QA
1.09561	0.74525	10.8503	2.31868e-21	1.69925e-19	37.9018	18.7697	up	Group1-other	PLA2G2D
1.47237	5.6246	10.8038	3.1479e-21	2.26833e-19	37.6001	18.6443	up	Group1-other	C1QC
2.53595	3.6122	10.7299	5.11459e-21	3.59524e-19	37.1211	18.4443	up	Group1-other	CCL19
1.08193	2.33633	10.7213	5.4081e-21	3.75557e-19	37.066	18.4253	up	Group1-other	GZMA
1.12172	2.75566	10.606	1.15159e-20	7.74717e-19	36.3201	18.1109	up	Group1-other	ADA2
1.02824	2.63297	10.463	2.93311e-20	1.89902e-18	35.3976	17.7215	up	Group1-other	C5AR1
1.17112	1.6693	10.4558	3.07369e-20	1.98259e-18	35.3514	17.7028	up	Group1-other	CD1C
1.15612	1.13145	10.4438	3.32547e-20	2.12116e-18	35.2737	17.6734	up	Group1-other	FCN1
1.01391	2.02918	10.4412	3.3809e-20	2.14856e-18	35.2574	17.6679	up	Group1-other	MSR1
1.36155	2.75571	10.4349	3.5225e-20	2.23031e-18	35.2169	17.6516	up	Group1-other	CYP1B1
1.06252	2.27756	10.3806	5.01943e-20	3.15491e-18	34.8675	17.501	up	Group1-other	HSD11B1
1.04694	2.20374	10.3611	5.70073e-20	3.54433e-18	34.7419	17.4505	up	Group1-other	BCL2A1
1.04485	2.22973	10.348	6.20865e-20	3.84623e-18	34.6577	17.415	up	Group1-other	NKG7
1.33675	3.15032	10.1152	2.816e-19	1.61657e-17	33.1663	16.7914	up	Group1-other	VSIG4
1.16761	3.53238	10.0875	3.3678e-19	1.9142e-17	32.9898	16.718	up	Group1-other	ITGB2
1.2198	5.06418	9.99362	6.17893e-19	3.45498e-17	32.3912	16.4616	up	Group1-other	TYROBP
1.38476	4.26258	9.92234	9.78541e-19	5.33305e-17	31.9379	16.273	up	Group1-other	GPNMB
1.02662	5.90581	9.72884	3.39355e-18	1.74981e-16	30.7117	15.757	up	Group1-other	A2M
1.33947	2.71812	9.71044	3.81813e-18	1.95702e-16	30.5955	15.7084	up	Group1-other	MRC1
1.47109	1.68664	9.70883	3.85771e-18	1.97144e-16	30.5853	15.7052	up	Group1-other	CD79B
1.49049	1.86995	9.66259	5.18645e-18	2.63484e-16	30.2936	15.5792	up	Group1-other	CHRDL1
1.05522	2.57804	9.65697	5.37617e-18	2.70726e-16	30.2582	15.5675	up	Group1-other	MOXD1
1.95298	2.3171	9.63939	6.0158e-18	2.98571e-16	30.1474	15.525	up	Group1-other	CD79A
1.19878	3.56439	9.63739	6.09307e-18	3.01537e-16	30.1348	15.5207	up	Group1-other	TMEM119
1.32345	2.83484	9.37047	3.33147e-17	1.52999e-15	28.4605	14.8153	up	Group1-other	CXCL12
2.00415	1.87954	9.36693	3.40714e-17	1.56058e-15	28.4384	14.8067	up	Group1-other	CXCL13
1.35334	3.13542	9.31896	4.61632e-17	2.08121e-15	28.1391	14.6817	up	Group1-other	COL14A1
2.01848	4.47493	9.29523	5.36375e-17	2.39934e-15	27.9913	14.6199	up	Group1-other	C7
1.39657	3.68321	9.25491	6.91915e-17	3.06328e-15	27.7404	14.5138	up	Group1-other	CCDC80
1.02472	3.1324	9.22215	8.50746e-17	3.70925e-15	27.5368	14.4307	up	Group1-other	FBLN5
1.16133	1.11811	9.1085	1.73913e-16	7.26974e-15	26.8325	14.1385	up	Group1-other	CD22
1.10277	3.80725	8.87209	7.62112e-16	2.94946e-14	25.3777	13.5303	up	Group1-other	ALOX5AP
1.74289	2.79615	8.86254	8.08746e-16	3.12292e-14	25.3192	13.5054	up	Group1-other	IGLL5
1.24487	2.99206	8.80695	1.14224e-15	4.30452e-14	24.9793	13.3661	up	Group1-other	F13A1
1.0829	0.817215	8.75239	1.60174e-15	5.9243e-14	24.6466	13.2274	up	Group1-other	SCARA5
1.19956	5.47169	8.71712	1.9922e-15	7.3155e-14	24.4319	13.1358	up	Group1-other	C1S
1.20967	3.92461	8.69423	2.29489e-15	8.37344e-14	24.2927	13.0771	up	Group1-other	EFEMP1
1.60742	4.54554	8.65162	2.98463e-15	1.07086e-13	24.0341	12.9703	up	Group1-other	SFRP4
1.28822	5.44546	8.61087	3.83589e-15	1.35096e-13	23.7872	12.8694	up	Group1-other	SERPINF1
1.38978	1.94814	8.56203	5.17859e-15	1.80436e-13	23.4919	12.7437	up	Group1-other	ADH1B
2.24823	5.01809	8.55214	5.50257e-15	1.91059e-13	23.4322	12.7188	up	Group1-other	JCHAIN
1.06408	2.93763	8.49227	7.94097e-15	2.71348e-13	23.0714	12.5665	up	Group1-other	SRPX
1.56906	2.92738	8.4693	9.1386e-15	3.09204e-13	22.9332	12.5098	up	Group1-other	ACKR1
1.19922	1.99621	8.45991	9.67786e-15	3.26808e-13	22.8768	12.4857	up	Group1-other	MZB1
1.18993	3.60008	8.45716	9.84229e-15	3.31062e-13	22.8603	12.4801	up	Group1-other	FCGR3A
1.0285	2.63259	8.38825	1.49826e-14	4.90553e-13	22.447	12.3093	up	Group1-other	ITM2A
1.29664	1.9519	8.3721	1.65305e-14	5.38162e-13	22.3503	12.2691	up	Group1-other	OGN
1.49279	1.01818	8.36692	1.70593e-14	5.53288e-13	22.3194	12.257	up	Group1-other	MS4A1
1.05105	8.47426	8.31764	2.3012e-14	7.32556e-13	22.0251	12.1352	up	Group1-other	CD74
1.46336	2.31597	8.2756	2.96915e-14	9.33115e-13	21.7745	12.0301	up	Group1-other	CXCL9
1.17704	2.20135	8.13174	7.07125e-14	2.08529e-12	20.9216	11.6808	up	Group1-other	NGFR
1.09653	5.40706	8.1143	7.85259e-14	2.29605e-12	20.8187	11.639	up	Group1-other	SPARCL1
1.02184	5.41952	8.10857	8.12698e-14	2.37225e-12	20.7849	11.6248	up	Group1-other	C1R
1.00159	0.58979	8.09341	8.90132e-14	2.58513e-12	20.6955	11.5875	up	Group1-other	FCRLA
1.2296	7.46209	8.03642	1.25214e-13	3.57618e-12	20.3602	11.4466	up	Group1-other	HLA-DRB1
1.06334	2.6443	7.95388	2.04882e-13	5.69109e-12	19.8765	11.2448	up	Group1-other	HLA-DQB2
1.15899	0.78256	7.9462	2.14459e-13	5.91892e-12	19.8317	11.2278	up	Group1-other	CD19
1.00369	3.09999	7.92098	2.49157e-13	6.7788e-12	19.6844	11.1688	up	Group1-other	TGFB3
1.30302	2.80519	7.84128	3.99617e-13	1.06371e-11	19.2205	10.9732	up	Group1-other	LTB
1.24756	4.8682	7.72879	7.75514e-13	1.967e-11	18.5697	10.7062	up	Group1-other	MFAP4
1.34572	1.22966	7.62732	1.40502e-12	3.40807e-11	17.9865	10.4675	up	Group1-other	VPREB3
1.05415	3.82038	7.60116	1.63664e-12	3.93113e-11	17.8368	10.4055	up	Group1-other	FBLN2
1.52284	3.17354	7.58404	1.80832e-12	4.30149e-11	17.739	10.3664	up	Group1-other	CCL18
1.16263	4.84171	7.58261	1.82346e-12	4.32557e-11	17.7308	10.364	up	Group1-other	DCN
1.24349	2.04424	7.54931	2.21312e-12	5.19269e-11	17.5408	10.2846	up	Group1-other	CILP
1.05878	3.70156	7.52759	2.51057e-12	5.84285e-11	17.4172	10.2334	up	Group1-other	OLFML2B
1.88513	4.04355	7.52199	2.59341e-12	5.97909e-11	17.3853	10.2234	up	Group1-other	CCL21
1.0024	3.4615	7.49285	3.07046e-12	7.01319e-11	17.2197	10.1541	up	Group1-other	RGS1
1.23774	6.20152	7.44101	4.14275e-12	9.27781e-11	16.9261	10.0326	up	Group1-other	MGP
1.25486	1.94896	7.4345	4.30131e-12	9.60794e-11	16.8892	10.0174	up	Group1-other	CCL17
1.36863	5.0243	7.42881	4.44486e-12	9.91573e-11	16.857	10.0037	up	Group1-other	THBS1
1.42359	4.12316	7.42025	4.66967e-12	1.03369e-10	16.8087	9.98561	up	Group1-other	PTGDS
1.04631	2.74628	7.39148	5.51046e-12	1.21047e-10	16.6464	9.91704	up	Group1-other	CPA3
1.59712	1.21433	7.38426	5.7439e-12	1.25854e-10	16.6057	9.90013	up	Group1-other	CR2
1.30678	5.80094	7.36478	6.42395e-12	1.39688e-10	16.496	9.85484	up	Group1-other	HLA-DRB5
1.2363	6.33554	7.34718	7.10627e-12	1.53749e-10	16.3971	9.81319	up	Group1-other	CCN2
1.62082	2.09993	7.30033	9.2918e-12	1.97073e-10	16.1343	9.70537	up	Group1-other	FABP4
1.16368	2.63309	7.19739	1.6698e-11	3.41652e-10	15.5601	9.46642	up	Group1-other	OLR1
1.13697	4.07627	7.19107	1.73072e-11	3.53156e-10	15.525	9.45203	up	Group1-other	HLA-DQB1
1.05476	0.577465	7.13586	2.36554e-11	4.73712e-10	15.219	9.32449	up	Group1-other	FCER2
1.01422	3.38409	7.13562	2.36878e-11	4.73811e-10	15.2177	9.3244	up	Group1-other	FBN1
1.18583	4.62171	7.09449	2.98711e-11	5.82606e-10	14.9906	9.23463	up	Group1-other	FBLN1
1.18875	2.43142	7.07691	3.29773e-11	6.36698e-10	14.8938	9.19607	up	Group1-other	MEDAG
1.07195	3.36975	7.02377	4.44381e-11	8.3824e-10	14.6018	9.07663	up	Group1-other	SPON1
1.05323	1.44036	6.9139	8.2024e-11	1.49168e-09	14.0022	8.82633	up	Group1-other	PTX3
1.21852	3.50444	6.67716	3.01777e-10	4.95916e-09	12.7288	8.30459	up	Group1-other	THBS4
1.14707	1.32959	6.66326	3.25503e-10	5.31357e-09	12.6548	8.27461	up	Group1-other	PI16
1.3082	3.09855	6.58238	5.04809e-10	7.97597e-09	12.2263	8.09822	up	Group1-other	HLA-DQA2
1.04185	3.34025	6.45617	9.94992e-10	1.48361e-08	11.564	7.82868	up	Group1-other	CCL2
1.07321	2.30303	6.40743	1.29048e-09	1.88504e-08	11.3103	7.72468	up	Group1-other	CXCL10
1.27517	5.50633	6.3502	1.74868e-09	2.4889e-08	11.014	7.60399	up	Group1-other	APOD
1.8253	2.64063	6.33014	1.94437e-09	2.74026e-08	10.9106	7.56221	up	Group1-other	FDCSP
1.15241	4.54964	6.06374	7.80948e-09	9.80283e-08	9.55637	7.00865	up	Group1-other	APOC1
1.11961	3.0937	6.02332	9.61322e-09	1.18256e-07	9.3542	6.92718	up	Group1-other	DPT
1.20362	2.72956	5.87792	2.01563e-08	2.3204e-07	8.63439	6.63444	up	Group1-other	FOSB
1.12331	7.26223	5.78994	3.13756e-08	3.45936e-07	8.20458	6.461	up	Group1-other	LUM
1.04231	5.4788	5.48472	1.40906e-07	1.35267e-06	6.74816	5.86881	up	Group1-other	CCN1
1.15053	6.19037	5.43473	1.79302e-07	1.6755e-06	6.51491	5.77586	up	Group1-other	C3
1.0424	5.48328	5.24095	4.50052e-07	3.8638e-06	5.62525	5.41299	up	Group1-other	SERPINE1
1.33398	7.01246	5.06404	1.02239e-06	8.11037e-06	4.8337	5.09096	up	Group1-other	SFRP2
1.58589	2.63573	5.05524	1.06449e-06	8.39789e-06	4.79482	5.07583	up	Group1-other	PLA2G2A
1.04147	8.40365	4.68945	5.44736e-06	3.5903e-05	3.22559	4.44487	up	Group1-other	COL3A1
1.92089	4.33041	3.92614	0.000123403	0.00055854	0.254794	3.25295	up	Group1-other	PPY
1.34345	4.87888	2.63084	0.00926691	0.0237492	-3.73662	1.62435	up	Group1-other	GCG
1.05122	2.53309	2.53264	0.0121879	0.0299046	-3.98074	1.52426	up	Group1-other	REG3G
1.26376	3.15953	7.50655	2.83803e-12	9.71448e-09	17.4537	8.01258	up	Group2-other	PROM2
1.53262	2.96162	7.25012	1.23806e-11	1.77683e-08	16.0463	7.75035	up	Group2-other	SYT8
1.00427	4.14777	7.21727	1.49237e-11	1.97705e-08	15.8679	7.70398	up	Group2-other	PKP3
1.05804	2.34362	6.99565	5.20364e-11	4.26748e-08	14.6755	7.36983	up	Group2-other	PITX1
1.06739	6.22188	6.8731	1.02897e-10	6.11066e-08	14.0249	7.21391	up	Group2-other	TM4SF1
1.1389	3.46054	6.68163	2.94645e-10	1.12764e-07	13.0216	6.94783	up	Group2-other	EPS8L1
1.58302	5.76264	6.66101	3.2967e-10	1.18283e-07	12.9145	6.92708	up	Group2-other	S100A14
1.18927	4.22424	6.50797	7.541e-10	1.99802e-07	12.126	6.6994	up	Group2-other	PHLDA2
1.40053	6.99919	6.49719	7.99025e-10	2.02365e-07	12.0709	6.69387	up	Group2-other	SLPI
1.38153	3.74721	6.44942	1.03192e-09	2.30802e-07	11.8273	6.63676	up	Group2-other	SFTA2
1.05775	5.49773	6.40813	1.28613e-09	2.54594e-07	11.6176	6.59415	up	Group2-other	LAD1
1.00047	3.26839	6.28719	2.43977e-09	4.20178e-07	11.0081	6.37657	up	Group2-other	PTK6
1.42259	6.101	6.27419	2.61236e-09	4.24423e-07	10.9431	6.3722	up	Group2-other	MUC1
1.06128	10.0777	6.25877	2.83286e-09	4.43523e-07	10.866	6.35308	up	Group2-other	S100A6
1.30139	3.31481	6.19388	3.97856e-09	5.57063e-07	10.5429	6.2541	up	Group2-other	CLIC3
1.13409	2.35562	6.18366	4.19632e-09	5.82815e-07	10.4923	6.23447	up	Group2-other	TNNI2
1.46192	6.02174	6.10888	6.18773e-09	7.61179e-07	10.123	6.11851	up	Group2-other	C19orf33
1.07797	5.22522	6.09257	6.73238e-09	8.01855e-07	10.0428	6.0959	up	Group2-other	ITGB4
1.38636	8.12887	5.93836	1.48408e-08	1.40934e-06	9.29184	5.85099	up	Group2-other	KRT19
1.39692	6.15238	5.84205	2.41606e-08	2.00045e-06	8.82921	5.69887	up	Group2-other	KRT7
1.66448	5.25696	5.73113	4.2088e-08	3.04555e-06	8.30271	5.51633	up	Group2-other	MSLN
1.13502	3.50264	5.63944	6.6252e-08	4.27338e-06	7.87267	5.36923	up	Group2-other	CAPN8
1.02476	3.94953	5.6057	7.81983e-08	4.82699e-06	7.71561	5.31632	up	Group2-other	KCNN4
1.41463	3.34056	5.44362	1.71841e-07	8.31307e-06	6.97033	5.08024	up	Group2-other	KRT16
1.27121	5.51269	5.42924	1.84139e-07	8.71221e-06	6.90495	5.05987	up	Group2-other	SFN
1.18085	5.68735	5.42541	1.87552e-07	8.82522e-06	6.88758	5.05427	up	Group2-other	LAMB3
1.02911	4.06775	5.27612	3.81539e-07	1.48999e-05	6.2164	4.82682	up	Group2-other	ITGB6
1.61846	5.88304	5.17146	6.22734e-07	2.12023e-05	5.75397	4.67362	up	Group2-other	KRT17
1.16028	4.93046	5.14503	7.04016e-07	2.31098e-05	5.63825	4.6362	up	Group2-other	GPRC5A
1.07364	3.40205	5.13893	7.24185e-07	2.36211e-05	5.61161	4.6267	up	Group2-other	ARL14
1.05986	3.10637	5.11477	8.09753e-07	2.60178e-05	5.5063	4.58473	up	Group2-other	TRIM29
1.18881	4.56519	5.08422	9.32128e-07	2.87175e-05	5.37364	4.54185	up	Group2-other	VSIG2
1.28734	2.08403	5.07993	9.5067e-07	2.89922e-05	5.35507	4.53772	up	Group2-other	SPRR1A
1.64981	3.59778	5.0577	1.05273e-06	3.0886e-05	5.25898	4.51024	up	Group2-other	MUCL3
1.13926	5.94059	5.03316	1.17769e-06	3.34138e-05	5.15331	4.47607	up	Group2-other	TACSTD2
1.37813	3.55661	4.94196	1.78125e-06	4.59921e-05	4.76378	4.33732	up	Group2-other	CA9
1.02399	5.42282	4.78723	3.5509e-06	7.68262e-05	4.11531	4.11449	up	Group2-other	PDZK1IP1
1.02836	5.43903	4.77801	3.69808e-06	7.9412e-05	4.07718	4.10011	up	Group2-other	LAMC2
1.18124	5.03885	4.68519	5.54979e-06	0.000107271	3.69629	3.96952	up	Group2-other	DEFB1
1.10878	2.26192	4.6177	7.42899e-06	0.000134654	3.42298	3.87078	up	Group2-other	PADI1
1.00761	3.06695	4.53018	1.07952e-05	0.000179975	3.07316	3.74479	up	Group2-other	TNS4
1.03769	1.7281	4.51938	1.13006e-05	0.000186059	3.03036	3.73035	up	Group2-other	SPRR3
1.15265	3.6526	4.49663	1.24407e-05	0.000200237	2.94049	3.69846	up	Group2-other	AQP5
1.21661	2.77036	4.48008	1.3339e-05	0.000211852	2.87532	3.67397	up	Group2-other	MUC5AC
1.35035	7.41331	4.43553	1.60784e-05	0.000245698	2.7008	3.6096	up	Group2-other	LCN2
1.00958	4.40806	4.20303	4.16868e-05	0.000515754	1.81288	3.28756	up	Group2-other	CRABP2
1.52838	4.41752	4.09376	6.43913e-05	0.000707831	1.40901	3.15007	up	Group2-other	PSCA
1.32573	5.87556	4.01233	8.85467e-05	0.000903407	1.11372	3.04412	up	Group2-other	S100P
1.26114	6.46277	4.00999	8.9354e-05	0.000910026	1.10531	3.04095	up	Group2-other	CTSE
1.06783	3.80263	3.98348	9.90122e-05	0.000986228	1.01029	3.00602	up	Group2-other	COL17A1
1.18103	3.13553	3.9723	0.000103377	0.00102378	0.970375	2.98979	up	Group2-other	S100A2
1.00003	3.05392	3.87458	0.000150141	0.00136091	0.625474	2.86617	up	Group2-other	DUOXA2
1.14472	2.54394	3.81019	0.000191277	0.0016369	0.402138	2.78598	up	Group2-other	KRT6A
1.42974	5.4631	3.7886	0.000207316	0.00173125	0.327957	2.76164	up	Group2-other	TFF2
1.01453	2.14486	3.7564	0.000233617	0.00188979	0.217998	2.72359	up	Group2-other	SPRR1B
1.51783	6.86758	3.52106	0.000546424	0.00363621	-0.561266	2.43935	up	Group2-other	TFF1
1.43789	6.67212	3.51333	0.000561494	0.00371354	-0.586122	2.43021	up	Group2-other	OLFM4
1.00086	6.85079	3.44349	0.000716501	0.00446117	-0.80856	2.35055	up	Group2-other	MMP7
1.26263	4.29123	3.33843	0.00102677	0.00584564	-1.13586	2.23317	up	Group2-other	CLDN18
1.00808	4.79455	3.21578	0.00154614	0.00797472	-1.50664	2.09828	up	Group2-other	MMP1
1.14283	3.63811	3.14744	0.00193251	0.00949724	-1.7079	2.0224	up	Group2-other	CRP
1.01434	5.29248	2.56245	0.0112244	0.0372171	-3.26994	1.42926	up	Group2-other	CEACAM5
1.16007	3.33959	10.362	5.67075e-20	2.50415e-17	34.774	16.6013	up	Group3-other	FOXP4
1.49741	2.91086	9.46804	1.79404e-17	2.71026e-15	29.1381	14.567	up	Group3-other	PEMT
1.30963	1.80335	9.24069	7.57142e-17	9.58786e-15	27.7291	14.0183	up	Group3-other	ARFGEF3
1.54976	2.67581	8.80483	1.15773e-15	9.4945e-14	25.0617	13.0225	up	Group3-other	FOXA2
1.28921	1.24512	8.19501	4.83273e-14	2.35777e-12	21.4152	11.6275	up	Group3-other	FAM222A
1.03246	1.79828	8.179	5.32214e-14	2.56028e-12	21.321	11.5917	up	Group3-other	LRRC23
1.81737	1.17733	8.11987	7.5956e-14	3.49189e-12	20.9737	11.4569	up	Group3-other	SMIM32
1.26089	0.636293	7.99937	1.56268e-13	6.64504e-12	20.2694	11.1775	up	Group3-other	WNK4
1.12758	2.60998	7.91778	2.53986e-13	1.02439e-11	19.7954	10.9895	up	Group3-other	RAP1GAP2
1.02457	2.70924	7.91346	2.6059e-13	1.04612e-11	19.7703	10.9804	up	Group3-other	FAM174B
1.7364	3.27194	7.80259	5.02313e-13	1.88883e-11	19.13	10.7238	up	Group3-other	PTPRN2
1.09376	3.97951	7.29687	9.47903e-12	2.49233e-10	16.2664	9.60339	up	Group3-other	SEZ6L2
1.46376	0.650754	7.12688	2.48894e-11	5.91455e-10	15.3265	9.22808	up	Group3-other	SYT5
1.12392	3.37217	7.10587	2.80208e-11	6.61062e-10	15.2112	9.17976	up	Group3-other	HID1
1.31304	0.793012	6.94715	6.81824e-11	1.44255e-09	14.3461	8.84087	up	Group3-other	TPSG1
1.29562	2.87032	6.91847	7.99745e-11	1.66746e-09	14.191	8.77795	up	Group3-other	PODXL2
1.06957	0.496742	6.87489	1.01845e-10	2.05625e-09	13.9559	8.68692	up	Group3-other	TMEM145
1.2326	1.37273	6.78632	1.66036e-10	3.14636e-09	13.4809	8.50219	up	Group3-other	SSTR1
1.06697	0.335503	6.73101	2.24912e-10	4.08589e-09	13.186	8.38871	up	Group3-other	SEZ6
1.52468	1.56581	6.71175	2.49895e-10	4.49237e-09	13.0836	8.34752	up	Group3-other	DDC
1.08612	1.32902	6.60489	4.46963e-10	7.54667e-09	12.519	8.12224	up	Group3-other	C2CD4A
1.45722	1.76952	6.52918	6.72633e-10	1.08364e-08	12.1222	7.96512	up	Group3-other	WNT4
1.40729	1.58152	6.46757	9.36228e-10	1.44998e-08	11.8014	7.83864	up	Group3-other	NEURL1
1.35735	3.73079	6.31476	2.10915e-09	3.03456e-08	11.0138	7.5179	up	Group3-other	ATP2A3
1.12207	1.70663	6.30815	2.18406e-09	3.12149e-08	10.98	7.50564	up	Group3-other	GIPR
1.02987	0.594855	6.29805	2.30349e-09	3.26776e-08	10.9284	7.48575	up	Group3-other	SYNGR4
1.41115	1.40413	6.25461	2.89463e-09	4.00735e-08	10.7071	7.39714	up	Group3-other	SYP
1.24625	4.71473	6.18819	4.09731e-09	5.39892e-08	10.3705	7.26769	up	Group3-other	NPDC1
1.33997	0.870908	6.13745	5.335e-09	6.88751e-08	10.1149	7.16194	up	Group3-other	ARX
1.10733	2.82011	6.07636	7.31811e-09	9.09225e-08	9.80898	7.04133	up	Group3-other	GADD45G
1.15894	1.68451	6.03524	9.04331e-09	1.10222e-07	9.60417	6.95773	up	Group3-other	RAB26
1.14148	1.28729	6.02477	9.54247e-09	1.15489e-07	9.5522	6.93746	up	Group3-other	CACNA2D2
1.07222	0.821018	5.96178	1.31699e-08	1.52607e-07	9.24061	6.81643	up	Group3-other	FBLL1
1.0279	0.476145	5.94685	1.42109e-08	1.63488e-07	9.16705	6.78652	up	Group3-other	ACTL6B
1.43621	1.90933	5.94137	1.46126e-08	1.67437e-07	9.14011	6.77615	up	Group3-other	MS4A8
1.21072	0.617523	5.78182	3.268e-08	3.4423e-07	8.36248	6.46315	up	Group3-other	KCNH6
1.28322	0.772424	5.7638	3.57575e-08	3.71869e-07	8.2756	6.42961	up	Group3-other	TMEM179
1.04979	0.499486	5.75459	3.74395e-08	3.87723e-07	8.23122	6.41148	up	Group3-other	C5orf38
1.38035	1.17021	5.70171	4.86992e-08	4.89893e-07	7.97747	6.3099	up	Group3-other	INSM1
1.11629	2.50245	5.6794	5.4386e-08	5.41721e-07	7.87092	6.26622	up	Group3-other	SMIM6
1.64816	2.54403	5.52664	1.15006e-07	1.05444e-06	7.14899	5.97698	up	Group3-other	KIAA1324
1.38866	1.99947	5.51815	1.19845e-07	1.09187e-06	7.10928	5.96183	up	Group3-other	EDN3
1.26569	1.69032	5.38749	2.2487e-07	1.88912e-06	6.50347	5.72374	up	Group3-other	SNAP25
1.20252	1.0198	5.30149	3.38432e-07	2.70337e-06	6.11038	5.56809	up	Group3-other	RUNDC3A
1.08427	0.96626	5.29436	3.50031e-07	2.77927e-06	6.07799	5.55607	up	Group3-other	CDK5R2
1.05473	0.841362	5.27878	3.76731e-07	2.97481e-06	6.00735	5.52654	up	Group3-other	GUCY2C
1.46386	1.44066	5.19055	5.69723e-07	4.30152e-06	5.6101	5.36638	up	Group3-other	HEPACAM2
1.35811	1.61195	5.1236	7.77323e-07	5.69178e-06	5.31195	5.24475	up	Group3-other	SMOC1
1.1814	0.689011	5.11402	8.1246e-07	5.91136e-06	5.26954	5.22831	up	Group3-other	IRX2
1.03567	1.916	4.98485	1.46703e-06	9.97835e-06	4.70323	5.00094	up	Group3-other	MLXIPL
1.33244	1.04688	4.98117	1.49173e-06	1.01224e-05	4.68725	4.99472	up	Group3-other	CALY
1.39028	1.4535	4.97309	1.54737e-06	1.0467e-05	4.65218	4.98018	up	Group3-other	NKX2-2
1.02336	3.95468	4.96337	1.61692e-06	1.08861e-05	4.6101	4.96313	up	Group3-other	CKB
1.20033	2.19736	4.95652	1.66775e-06	1.12021e-05	4.58046	4.9507	up	Group3-other	SYT7
1.06863	0.767588	4.95144	1.70648e-06	1.14443e-05	4.55849	4.94141	up	Group3-other	TMEM63C
1.23255	1.44991	4.82785	2.96678e-06	1.85999e-05	4.02959	4.73049	up	Group3-other	C1QL1
1.09849	0.943163	4.77119	3.81045e-06	2.3246e-05	3.79054	4.63365	up	Group3-other	SEZ6L
1.17751	1.06887	4.76796	3.86494e-06	2.35535e-05	3.77698	4.62795	up	Group3-other	CELF3
1.96761	3.39153	4.75265	4.13378e-06	2.49972e-05	3.71279	4.60211	up	Group3-other	PCSK1N
1.08651	0.916765	4.69885	5.22922e-06	3.06945e-05	3.48851	4.51294	up	Group3-other	VWA5B2
1.41265	1.36174	4.69067	5.41884e-06	3.16296e-05	3.45454	4.49991	up	Group3-other	CPLX2
1.31447	1.60918	4.56061	9.48437e-06	5.17881e-05	2.92129	4.28577	up	Group3-other	PCSK1
1.0337	1.28785	4.5307	1.07704e-05	5.77696e-05	2.80032	4.2383	up	Group3-other	KIF1A
1.14275	0.984363	4.50067	1.22296e-05	6.46863e-05	2.67949	4.18919	up	Group3-other	CFC1
1.21473	1.79159	4.41918	1.7212e-05	8.67757e-05	2.35484	4.0616	up	Group3-other	VGF
1.3311	2.54397	4.33204	2.46811e-05	0.000119197	2.01296	3.92373	up	Group3-other	APLP1
1.02984	1.31087	4.15895	4.97264e-05	0.000220958	1.35018	3.65569	up	Group3-other	TCEAL2
1.30349	3.59376	4.07616	6.90041e-05	0.000297207	1.04103	3.52694	up	Group3-other	CLDN3
1.29795	3.06027	4.03058	8.2472e-05	0.00034727	0.873036	3.45933	up	Group3-other	TM4SF5
1.21261	5.05115	3.88079	0.000146645	0.000575027	0.331977	3.24031	up	Group3-other	CPE
1.03592	1.35294	3.85605	0.00016102	0.000622606	0.24426	3.20579	up	Group3-other	PPP1R1A
1.25698	2.11442	3.76296	0.000228004	0.000845799	-0.0815031	3.07273	up	Group3-other	PTPRN
1.17321	3.39099	3.60538	0.000404908	0.00140195	-0.61745	2.85327	up	Group3-other	EEF1A2
1.06248	1.73193	3.51699	0.000554298	0.00185038	-0.909417	2.73274	up	Group3-other	APOH
1.15111	1.78309	3.35428	0.000973022	0.00301229	-1.43035	2.5211	up	Group3-other	PCSK2
1.12827	1.60667	3.29122	0.00120361	0.00361566	-1.62642	2.44181	up	Group3-other	CRYBA2
1.13304	2.01648	3.23431	0.00145444	0.0042679	-1.80052	2.36979	up	Group3-other	SCG3
1.15816	2.08942	3.22015	0.00152399	0.00444132	-1.84343	2.35249	up	Group3-other	ABCC8
1.12604	0.724252	3.13905	0.00198562	0.00560596	-2.08595	2.25135	up	Group3-other	CLCA1
1.08437	2.91323	2.82272	0.00530593	0.0131917	-2.97851	1.8797	up	Group3-other	BEX1
1.41209	3.78139	2.78056	0.00601259	0.0147316	-3.09096	1.83175	up	Group3-other	CHGB
1.11601	1.13905	2.73628	0.00684597	0.0164851	-3.2074	1.78291	up	Group3-other	ITLN1
1.1962	3.87847	2.39399	0.0177092	0.0372072	-4.04902	1.42937	up	Group3-other	CHGA
1.12463	1.67068	2.27739	0.0239565	0.0482548	-4.31172	1.31646	up	Group3-other	SPINK4

## Sheet: Table S5
Gene	Group
SPRR1B	TME signature gene 1
SPRR1A	TME signature gene 1
S100A2	TME signature gene 1
KRT6A	TME signature gene 1
PROM2	TME signature gene 1
SFTA2	TME signature gene 1
PADI1	TME signature gene 1
PSCA	TME signature gene 1
COL17A1	TME signature gene 1
TRIM29	TME signature gene 1
CLIC3	TME signature gene 1
KCNN4	TME signature gene 1
SFN	TME signature gene 1
C19orf33	TME signature gene 1
KRT19	TME signature gene 1
GPRC5A	TME signature gene 1
ITGB4	TME signature gene 1
LAMB3	TME signature gene 1
TM4SF1	TME signature gene 1
ITGB6	TME signature gene 1
KRT7	TME signature gene 1
MMP1	TME signature gene 1
CA9	TME signature gene 1
MUC5AC	TME signature gene 1
PTK6	TME signature gene 1
PKP3	TME signature gene 1
SLPI	TME signature gene 1
S100A14	TME signature gene 1
MUC1	TME signature gene 1
CAPN8	TME signature gene 1
CXCL9	TME signature gene 2
CXCL10	TME signature gene 2
SERPINE1	TME signature gene 2
CD22	TME signature gene 2
ADA2	TME signature gene 2
CLDN3	TME signature gene 2
FOXP4	TME signature gene 2
WNK4	TME signature gene 2
SMIM32	TME signature gene 2
NPDC1	TME signature gene 2
GADD45G	TME signature gene 2
PEMT	TME signature gene 2
CHGB	TME signature gene 2
CPLX2	TME signature gene 2
SCG3	TME signature gene 2
PCSK2	TME signature gene 2
CHGA	TME signature gene 2
CRYBA2	TME signature gene 2
HEPACAM2	TME signature gene 2
CPE	TME signature gene 2
PCSK1	TME signature gene 2
SNAP25	TME signature gene 2
CACNA2D2	TME signature gene 2
INSM1	TME signature gene 2
FAM222A	TME signature gene 2
WNT4	TME signature gene 2
SYT5	TME signature gene 2
IRX2	TME signature gene 2
SEZ6	TME signature gene 2
ACTL6B	TME signature gene 2
KCNH6	TME signature gene 2
SEZ6L	TME signature gene 2
PPP1R1A	TME signature gene 2
C1QL1	TME signature gene 2
TMEM63C	TME signature gene 2
TMEM179	TME signature gene 2
SYP	TME signature gene 2
VWA5B2	TME signature gene 2
RUNDC3A	TME signature gene 2
CELF3	TME signature gene 2
APOH	TME signature gene 2
ARX	TME signature gene 2
CALY	TME signature gene 2
CFC1	TME signature gene 2

## Sheet: Table S6
logFC	AveExpr	t	P.Value	adj.P.Val	B	logP	group	Gene
2.35264	3.10637	13.5657	3.21492e-29	5.53673e-25	55.668	24.2567	up	TRIM29
1.80274	2.34362	13.4451	7.20526e-29	6.20445e-25	54.8767	24.2073	up	PITX1
2.7395	6.02174	13.0742	8.63848e-28	4.15892e-24	52.4406	23.381	up	C19orf33
2.0624	3.94953	13.0575	9.65956e-28	4.15892e-24	52.3311	23.381	up	KCNN4
1.85053	3.26472	12.8344	4.30141e-27	1.48158e-23	50.866	22.8293	up	GJB3
2.59699	5.51269	12.7492	7.61138e-27	2.18472e-23	50.3062	22.6606	up	SFN
1.7544	4.36727	12.2957	1.57922e-25	3.88533e-22	47.3311	21.4106	up	EPHA2
2.01767	3.59778	12.1261	4.9018e-25	1.05523e-21	46.2197	20.9767	up	TMPRSS4
-0.512325	0.200699	-12.0375	8.85157e-25	1.6938e-21	45.6398	20.7711	not-sig	SCML2
2.54226	8.12887	12.0073	1.08283e-24	1.86484e-21	45.4421	20.7294	up	KRT19
0.969661	3.30441	11.8434	3.22816e-24	4.67072e-21	44.3702	20.3306	up	PLCB3
3.11993	5.25696	11.8381	3.34503e-24	4.67072e-21	44.3353	20.3306	up	MSLN
-0.998362	0.726575	-11.8302	3.52569e-24	4.67072e-21	44.2837	20.3306	down	RAB3C
1.56255	2.72178	11.7981	4.36471e-24	5.21062e-21	44.0742	20.2831	up	EVPL
2.31307	5.68735	11.7834	4.81454e-24	5.21062e-21	43.9779	20.2831	up	LAMB3
1.59544	3.57954	11.782	4.86017e-24	5.21062e-21	43.9687	20.2831	up	PRSS22
-1.52325	2.20204	-11.7734	5.14345e-24	5.21062e-21	43.9131	20.2831	down	TSPAN7
-1.37736	1.28729	-11.7571	5.73417e-24	5.47383e-21	43.8064	20.2617	down	CACNA2D2
2.37554	4.93046	11.7493	6.03895e-24	5.47383e-21	43.7556	20.2617	up	GPRC5A
1.90704	5.22522	11.6972	8.54386e-24	7.35712e-21	43.4151	20.1333	up	ITGB4
-1.66466	1.69032	-11.5854	1.79609e-23	1.47296e-20	42.686	19.8318	down	SNAP25
1.85734	3.46054	11.5671	2.02795e-23	1.5234e-20	42.5669	19.8172	up	EPS8L1
-1.24413	2.26203	-11.5666	2.0345e-23	1.5234e-20	42.5637	19.8172	down	TENT5C
-0.818699	0.312057	-11.5022	3.12027e-23	2.23905e-20	42.1441	19.6499	down	UNC79
1.10348	1.63872	11.4015	6.08768e-23	4.09566e-20	41.4882	19.3877	up	PLEKHN1
0.728203	4.52317	11.3991	6.1832e-23	4.09566e-20	41.4729	19.3877	up	CAPN1
2.23372	3.31481	11.3616	7.92571e-23	5.05543e-20	41.2293	19.2962	up	CLIC3
-0.677247	2.18757	-11.3225	1.02744e-22	6.31951e-20	40.9746	19.1993	down	SLC23A2
-1.97093	1.60918	-11.283	1.33395e-22	7.92181e-20	40.7184	19.1012	down	PCSK1
1.44992	2.53057	11.2163	2.07369e-22	1.19044e-19	40.2855	18.9243	up	MROH6
1.61139	3.9749	11.1565	3.07985e-22	1.711e-19	39.8973	18.7667	up	RHOD
1.67513	3.26839	11.12	3.92083e-22	2.11014e-19	39.6604	18.6757	up	PTK6
1.21094	5.83746	11.0907	4.75616e-22	2.48214e-19	39.4709	18.6052	up	JUP
-0.772451	1.72794	-11.0809	5.07291e-22	2.56958e-19	39.4077	18.5901	down	NCALD
0.897746	3.47968	11.0575	5.92316e-22	2.91453e-19	39.2556	18.5354	up	SSH3
1.69317	3.31246	11.0195	7.60833e-22	3.63974e-19	39.0099	18.4389	up	NECTIN4
0.757399	3.50442	11.0144	7.87093e-22	3.6636e-19	38.9766	18.4361	up	RPS6KA4
-1.64562	2.19736	-10.9857	9.50426e-22	4.30743e-19	38.7916	18.3658	down	SYT7
-1.67634	1.17021	-10.9771	1.00636e-21	4.37337e-19	38.7355	18.3592	down	INSM1
-0.950337	1.06865	-10.9757	1.01576e-21	4.37337e-19	38.7264	18.3592	down	NFASC
-1.01882	2.0387	-10.9563	1.1539e-21	4.84694e-19	38.6012	18.3145	down	OTULINL
-0.809935	0.419057	-10.9483	1.2161e-21	4.98658e-19	38.5497	18.3022	down	ELAVL4
-1.04949	0.515944	-10.8972	1.70341e-21	6.82234e-19	38.2191	18.1661	down	NOL4
-1.52589	1.58152	-10.8125	2.97298e-21	1.16365e-18	37.6726	17.9342	down	NEURL1
0.83404	0.985492	10.7866	3.52479e-21	1.34898e-18	37.5056	17.87	up	PERM1
-0.595986	1.22025	-10.7631	4.11293e-21	1.53984e-18	37.3541	17.8125	down	WASF3
1.06318	4.03196	10.7523	4.41254e-21	1.61687e-18	37.2852	17.7913	up	TRIP10
0.863326	2.96284	10.7391	4.813e-21	1.72687e-18	37.1999	17.7627	up	RHBDF1
-1.05682	0.554705	-10.7346	4.95741e-21	1.74238e-18	37.1709	17.7589	down	KCNMB2
0.67162	4.85795	10.7175	5.54516e-21	1.90998e-18	37.061	17.719	up	CTTN
1.19386	1.7433	10.7111	5.78455e-21	1.95336e-18	37.0195	17.7092	up	CRYBG2
-2.03821	5.05115	-10.6838	6.92008e-21	2.29188e-18	36.8436	17.6398	down	CPE
2.60506	3.34056	10.6559	8.3051e-21	2.67494e-18	36.6646	17.5727	up	KRT16
-0.787574	0.407091	-10.652	8.52112e-21	2.67494e-18	36.6395	17.5727	down	MTUS2
1.88687	4.22424	10.6516	8.54268e-21	2.67494e-18	36.637	17.5727	up	PHLDA2
-1.06346	0.81245	-10.6397	9.23366e-21	2.83562e-18	36.5607	17.5474	down	KIF5C
0.89949	5.33306	10.6373	9.38512e-21	2.83562e-18	36.5447	17.5474	up	RHOC
-1.20647	0.773584	-10.6146	1.08829e-20	3.21011e-18	36.3994	17.4935	down	SH3GL2
-1.26528	0.705749	-10.6131	1.09973e-20	3.21011e-18	36.3892	17.4935	down	RFX6
1.52292	3.20139	10.591	1.27032e-20	3.64623e-18	36.2477	17.4382	up	MST1R
-1.04541	0.515407	-10.5719	1.43996e-20	4.0654e-18	36.1247	17.3909	down	DPP6
-0.941223	0.604604	-10.5432	1.73647e-20	4.82346e-18	35.941	17.3166	down	RAB39B
1.72622	10.0777	10.5329	1.85775e-20	5.07844e-18	35.8748	17.2943	up	S100A6
-0.672323	0.359393	-10.5206	2.01356e-20	5.3521e-18	35.7958	17.2715	down	SPTB
1.1452	1.60863	10.5201	2.02001e-20	5.3521e-18	35.7926	17.2715	up	BLACAT1
-0.621957	0.282827	-10.438	3.45245e-20	9.00881e-18	35.2668	17.0453	down	NRXN1
-0.944363	1.01087	-10.4122	4.08582e-20	1.05024e-17	35.1015	16.9787	down	NAP1L2
-0.845415	1.60444	-10.4007	4.405e-20	1.11563e-17	35.0277	16.9525	down	ELMO1
-0.511892	1.84439	-10.3946	4.58181e-20	1.14359e-17	34.9891	16.9417	not-sig	HDHD2
1.54048	3.18163	10.3922	4.65465e-20	1.14518e-17	34.9737	16.9411	up	CDH3
1.7347	4.09249	10.3875	4.79801e-20	1.16382e-17	34.9439	16.9341	up	PLEK2
2.27689	3.54001	10.3768	5.1449e-20	1.23063e-17	34.8754	16.9099	up	KLK10
-0.805833	0.348833	-10.3586	5.79348e-20	1.36678e-17	34.759	16.8643	down	CHRNB2
1.6047	8.98565	10.3563	5.88164e-20	1.36883e-17	34.7441	16.8636	up	S100A11
-1.78397	2.47265	-10.3334	6.82791e-20	1.56787e-17	34.5978	16.8047	down	ERO1B
1.05816	2.44842	10.2945	8.79295e-20	1.96698e-17	34.3497	16.7062	up	SH2D3A
1.22876	4.3931	10.2938	8.83516e-20	1.96698e-17	34.345	16.7062	up	EFNB1
1.292	3.55777	10.2925	8.90863e-20	1.96698e-17	34.3369	16.7062	up	ANXA3
2.19737	5.94059	10.29	9.05622e-20	1.97426e-17	34.3207	16.7046	up	TACSTD2
-0.886286	0.492541	-10.2781	9.78079e-20	2.10556e-17	34.2452	16.6766	down	SNAP91
-1.97297	2.54403	-10.2672	1.04996e-19	2.22317e-17	34.1757	16.653	down	KIAA1324
-1.12848	1.24512	-10.2641	1.07119e-19	2.22317e-17	34.156	16.653	down	FAM222A
0.79921	1.31381	10.2639	1.07264e-19	2.22317e-17	34.1547	16.653	up	P2RY2
1.21308	4.84728	10.2623	1.08435e-19	2.22317e-17	34.144	16.653	up	PLEC
1.43756	3.21491	10.2519	1.16011e-19	2.35051e-17	34.0778	16.6288	up	MMP28
0.840219	0.96353	10.2157	1.46718e-19	2.93812e-17	33.8475	16.5319	up	RNF223
1.03697	3.92274	10.2135	1.48828e-19	2.94611e-17	33.8334	16.5308	up	UNC93B1
-0.578208	0.227648	-10.2019	1.60475e-19	3.14057e-17	33.7595	16.503	not-sig	KCNB2
-0.812172	0.740266	-10.1834	1.80976e-19	3.50199e-17	33.6416	16.4557	down	SGSM1
1.04154	3.91266	10.1768	1.888e-19	3.6128e-17	33.6001	16.4422	up	INF2
-0.826777	1.56728	-10.173	1.93602e-19	3.65479e-17	33.5755	16.4371	down	ARNT2
-1.34169	0.975447	-10.1717	1.95239e-19	3.65479e-17	33.5672	16.4371	down	INA
-0.414871	0.156834	-10.1605	2.09887e-19	3.88675e-17	33.4962	16.4104	not-sig	NPAS3
-1.60052	1.30457	-10.1413	2.37675e-19	4.3545e-17	33.3743	16.3611	down	NEUROD1
-2.18556	2.01648	-10.1395	2.40484e-19	4.35959e-17	33.3628	16.3606	down	SCG3
-0.724337	2.43666	-10.1355	2.46788e-19	4.42728e-17	33.3374	16.3539	down	CDIP1
1.19381	1.65233	10.133	2.50798e-19	4.45282e-17	33.3216	16.3514	up	GJB4
1.50921	6.4911	10.1129	2.85704e-19	5.02081e-17	33.1937	16.2992	up	S100A16
-0.624648	2.17198	-10.0866	3.3886e-19	5.89479e-17	33.0264	16.2295	down	ANGEL1
-0.736665	0.679076	-10.0705	3.75998e-19	6.47543e-17	32.9244	16.1887	down	CACNB2
-0.403808	0.13765	-10.0635	3.93405e-19	6.70814e-17	32.88	16.1734	not-sig	NEXMIF
-1.08704	2.89938	-10.0601	4.02017e-19	6.78779e-17	32.8588	16.1683	down	SEC11C
1.32568	7.39274	10.048	4.3494e-19	7.27237e-17	32.7816	16.1383	up	S100A10
-1.13364	0.59151	-10.041	4.55007e-19	7.53474e-17	32.7373	16.1229	down	RIMBP2
1.41184	4.14777	10.0042	5.7712e-19	9.46587e-17	32.5041	16.0238	up	PKP3
-0.653355	0.215637	-9.99505	6.12187e-19	9.85661e-17	32.4463	16.0063	down	KLHL32
-0.582587	0.345566	-9.995	6.12389e-19	9.85661e-17	32.446	16.0063	down	FGF12
1.37612	3.49667	9.98109	6.69932e-19	1.06829e-16	32.3579	15.9713	up	SLC16A3
1.09861	4.44295	9.96865	7.25947e-19	1.147e-16	32.2791	15.9404	up	JPT1
-1.23499	1.39748	-9.96124	7.61453e-19	1.19216e-16	32.2323	15.9237	down	RTN1
-1.00131	2.42227	-9.95507	7.92408e-19	1.22945e-16	32.1932	15.9103	down	GCH1
1.29633	6.4932	9.9436	8.53226e-19	1.30527e-16	32.1207	15.8843	up	ANXA2
3.06628	5.87556	9.94302	8.56437e-19	1.30527e-16	32.117	15.8843	up	S100P
-1.36658	0.617523	-9.94036	8.71235e-19	1.31618e-16	32.1002	15.8807	down	KCNH6
-0.758602	0.409685	-9.93865	8.80869e-19	1.3183e-16	32.0894	15.88	down	HMGCLL1
-0.666743	2.37384	-9.93741	8.87948e-19	1.3183e-16	32.0816	15.88	down	UNC119B
-0.688585	2.28967	-9.93169	9.21327e-19	1.35616e-16	32.0454	15.8677	down	GSTA4
1.45122	5.93424	9.92974	9.32938e-19	1.36161e-16	32.0331	15.8659	up	TSPO
2.31791	6.15238	9.92832	9.41554e-19	1.36177e-16	32.0241	15.8659	up	KRT7
1.31849	4.60878	9.92712	9.48856e-19	1.36177e-16	32.0165	15.8659	up	ITGA3
-0.595525	0.29703	-9.92529	9.60098e-19	1.36651e-16	32.005	15.8644	down	WDR17
1.55858	3.19373	9.90971	1.06147e-18	1.49842e-16	31.9065	15.8244	up	IL1RN
-0.557891	2.03153	-9.90525	1.09239e-18	1.52952e-16	31.8784	15.8154	not-sig	CASD1
2.47785	3.80263	9.89135	1.19474e-18	1.65934e-16	31.7905	15.7801	up	COL17A1
-0.743045	0.342194	-9.86886	1.38075e-18	1.90234e-16	31.6486	15.7207	down	FMN2
-1.11125	0.750915	-9.84128	1.64884e-18	2.25367e-16	31.4746	15.6471	down	CLGN
1.39517	2.51179	9.82149	1.87249e-18	2.53921e-16	31.3499	15.5953	up	AHNAK2
1.66187	2.94472	9.81075	2.00627e-18	2.69938e-16	31.2822	15.5687	up	SERPINB5
1.86721	5.7285	9.80675	2.0584e-18	2.74805e-16	31.2571	15.561	up	TSPAN1
1.00985	5.36916	9.80057	2.14182e-18	2.83742e-16	31.2181	15.5471	up	RRAS
1.18003	5.51492	9.79442	2.22801e-18	2.92907e-16	31.1794	15.5333	up	ST14
-0.70878	0.324068	-9.78799	2.32196e-18	3.02946e-16	31.1389	15.5186	down	SLC4A10
0.883519	2.5371	9.77572	2.51234e-18	3.24554e-16	31.0617	15.4887	up	SLC35F2
1.5179	5.05942	9.77491	2.52527e-18	3.24554e-16	31.0566	15.4887	up	SERINC2
1.21172	2.70231	9.77144	2.58219e-18	3.29411e-16	31.0348	15.4823	up	SLC16A5
2.33263	5.76264	9.75808	2.81324e-18	3.56247e-16	30.9507	15.4482	up	S100A14
-0.291961	0.0933191	-9.75346	2.89795e-18	3.64296e-16	30.9216	15.4385	not-sig	OTUD7A
1.38811	5.77759	9.75061	2.95144e-18	3.65844e-16	30.9037	15.4367	up	HMGA1
1.59413	6.17305	9.74978	2.96714e-18	3.65844e-16	30.8985	15.4367	up	LY6E
-1.53518	1.0188	-9.74942	2.974e-18	3.65844e-16	30.8962	15.4367	down	SYT4
-0.957967	1.03033	-9.73644	3.232e-18	3.94762e-16	30.8147	15.4037	down	CADPS
1.08275	3.06904	9.73261	3.31247e-18	4.01742e-16	30.7905	15.3961	up	ALDH3B1
0.966247	3.22041	9.72867	3.3971e-18	4.09125e-16	30.7658	15.3881	up	TOR4A
-0.730239	0.273166	-9.71712	3.658e-18	4.37487e-16	30.6933	15.359	down	UNC80
1.06908	2.78887	9.71313	3.75289e-18	4.4574e-16	30.6681	15.3509	up	PLCD3
-0.552448	1.10654	-9.70717	3.89869e-18	4.59886e-16	30.6308	15.3374	not-sig	MPP6
-0.672825	1.76346	-9.68853	4.39304e-18	5.09101e-16	30.5137	15.2932	down	DZIP3
-1.75693	1.4535	-9.68836	4.39795e-18	5.09101e-16	30.5126	15.2932	down	NKX2-2
-1.0415	0.655339	-9.68812	4.4046e-18	5.09101e-16	30.5111	15.2932	down	UNC13A
-1.10998	1.42601	-9.67275	4.85983e-18	5.57973e-16	30.4147	15.2534	down	NRCAM
-1.15	0.862176	-9.6609	5.24252e-18	5.97925e-16	30.3404	15.2234	down	SLC16A12
1.2325	4.37436	9.65967	5.28396e-18	5.98687e-16	30.3327	15.2228	up	TINAGL1
1.01353	1.20357	9.6549	5.44767e-18	6.13201e-16	30.3028	15.2124	up	KCP
2.18113	4.56519	9.64985	5.62652e-18	6.29221e-16	30.2711	15.2012	up	VSIG2
0.75693	1.23024	9.64598	5.76756e-18	6.40831e-16	30.2468	15.1933	up	ADAMTSL5
1.16168	2.38147	9.63987	5.99723e-18	6.62078e-16	30.2085	15.1791	up	TMEM92
-1.35086	0.767588	-9.6363	6.13576e-18	6.73057e-16	30.1861	15.1719	down	TMEM63C
0.904422	4.48983	9.63464	6.20111e-18	6.74552e-16	30.1758	15.171	up	GIPC1
-1.07972	0.971075	-9.63397	6.22772e-18	6.74552e-16	30.1716	15.171	down	NCAM1
-1.46105	1.40413	-9.6232	6.67111e-18	7.18061e-16	30.1041	15.1438	down	SYP
-0.398921	1.33208	-9.61807	6.89353e-18	7.37393e-16	30.072	15.1323	not-sig	RFXAP
-0.912403	2.44291	-9.61058	7.23153e-18	7.68775e-16	30.025	15.1142	down	STXBP1
1.05632	5.67661	9.60538	7.4756e-18	7.89845e-16	29.9925	15.1025	up	CSTB
-0.622821	3.25796	-9.60363	7.55926e-18	7.93815e-16	29.9816	15.1003	down	SMARCA2
-1.53531	1.06887	-9.60175	7.651e-18	7.98579e-16	29.9698	15.0977	down	CELF3
-0.458845	0.172122	-9.59826	7.82323e-18	8.11636e-16	29.9479	15.0906	not-sig	SCN3A
1.24173	3.30051	9.57722	8.94736e-18	9.22703e-16	29.8163	15.0349	up	ADAM8
2.06085	3.74721	9.55595	1.02475e-17	1.05049e-15	29.6833	14.9786	up	SFTA2
1.29146	7.16424	9.54213	1.11906e-17	1.14038e-15	29.597	14.9429	up	GSTP1
-0.506816	2.22505	-9.53319	1.1847e-17	1.20017e-15	29.5411	14.9208	not-sig	MARCH8
1.30871	1.73469	9.52191	1.27292e-17	1.282e-15	29.4707	14.8921	up	LEMD1
-0.647615	0.216033	-9.51513	1.32908e-17	1.33078e-15	29.4284	14.8759	down	GRIA2
-0.759999	0.32371	-9.50592	1.4094e-17	1.40305e-15	29.3708	14.8529	down	ST18
1.02305	4.51152	9.50103	1.45393e-17	1.43555e-15	29.3404	14.843	up	NET1
-0.417209	3.35693	-9.50051	1.45872e-17	1.43555e-15	29.3371	14.843	not-sig	PAFAH1B1
0.704412	4.29586	9.48358	1.62462e-17	1.58973e-15	29.2315	14.7987	up	MGAT4B
-0.859064	0.52445	-9.48035	1.65841e-17	1.61363e-15	29.2114	14.7922	down	GRIA3
1.57726	5.49773	9.47565	1.7087e-17	1.65322e-15	29.1821	14.7817	up	LAD1
-0.514406	3.08926	-9.45573	1.93939e-17	1.86593e-15	29.0579	14.7291	not-sig	NCOA5
-0.431964	1.98164	-9.45097	1.9989e-17	1.91087e-15	29.0283	14.7188	not-sig	FAM172A
1.5243	3.38932	9.45023	2.00829e-17	1.91087e-15	29.0237	14.7188	up	VILL
-0.878277	0.863428	-9.44838	2.03208e-17	1.91351e-15	29.0122	14.7182	down	CXXC4
-0.314179	1.38467	-9.44829	2.03328e-17	1.91351e-15	29.0116	14.7182	not-sig	ING3
-0.42945	1.42346	-9.43955	2.14938e-17	2.01178e-15	28.9572	14.6964	not-sig	SOCS7
-0.384124	1.05428	-9.42359	2.37863e-17	2.21431e-15	28.8578	14.6548	not-sig	FAM120C
-1.18154	0.732982	-9.41907	2.44785e-17	2.25922e-15	28.8297	14.646	down	SSTR3
-0.631761	0.291631	-9.41873	2.4531e-17	2.25922e-15	28.8276	14.646	down	ATRNL1
-0.918452	0.771889	-9.40753	2.63384e-17	2.40394e-15	28.7579	14.6191	down	PAX6
1.46919	5.74254	9.40727	2.63817e-17	2.40394e-15	28.7563	14.6191	up	SDC1
-2.19165	3.33192	-9.39916	2.77751e-17	2.51759e-15	28.7059	14.599	down	SCG2
-0.709798	0.418295	-9.3945	2.86071e-17	2.57943e-15	28.6769	14.5885	down	SCN3B
-0.780375	0.916447	-9.38787	2.98367e-17	2.67629e-15	28.6357	14.5725	down	HLF
1.05102	3.09961	9.38643	3.01096e-17	2.68677e-15	28.6268	14.5708	up	PPP1R13L
-0.697725	0.539414	-9.37989	3.13847e-17	2.78612e-15	28.5861	14.555	down	KIAA0319
-1.00734	0.496852	-9.37709	3.19451e-17	2.82133e-15	28.5688	14.5495	down	SVOP
1.03533	4.29249	9.36874	3.36813e-17	2.95949e-15	28.5169	14.5288	up	LRRC8A
-0.382957	0.135098	-9.35894	3.58388e-17	3.13307e-15	28.456	14.504	not-sig	GPLD1
1.70309	4.66767	9.3529	3.72375e-17	3.23891e-15	28.4185	14.4896	up	SLC2A1
-0.998734	0.599658	-9.34484	3.91863e-17	3.39129e-15	28.3685	14.4696	down	GCK
-0.659767	0.383062	-9.33653	4.13051e-17	3.55679e-15	28.3169	14.4489	down	SLC4A8
-2.03294	1.78309	-9.33513	4.16712e-17	3.57046e-15	28.3082	14.4473	down	PCSK2
-0.661472	1.56335	-9.33133	4.26858e-17	3.63929e-15	28.2847	14.439	down	GDAP1
-0.768582	3.05143	-9.31953	4.59964e-17	3.86927e-15	28.2115	14.4124	down	TMX4
-2.12317	2.08942	-9.3192	4.60914e-17	3.86927e-15	28.2094	14.4124	down	ABCC8
-0.400165	1.15494	-9.31905	4.61359e-17	3.86927e-15	28.2085	14.4124	not-sig	ELAC1
-0.717813	1.75608	-9.31855	4.6282e-17	3.86927e-15	28.2054	14.4124	down	GPRASP2
2.16359	2.26192	9.31603	4.70245e-17	3.8868e-15	28.1898	14.4104	up	PADI1
-0.676878	0.334839	-9.31575	4.71078e-17	3.8868e-15	28.1881	14.4104	down	AKAIN1
-1.34539	1.01029	-9.31555	4.71688e-17	3.8868e-15	28.1868	14.4104	down	GAD2
2.04131	6.99919	9.31204	4.82266e-17	3.95504e-15	28.1651	14.4028	up	SLPI
-1.12889	0.871568	-9.31123	4.84745e-17	3.95653e-15	28.16	14.4027	down	SLC6A17
-1.18487	1.2912	-9.31037	4.87386e-17	3.95932e-15	28.1547	14.4024	down	GNG4
-0.898595	2.27697	-9.29748	5.28761e-17	4.27527e-15	28.0748	14.369	down	RCAN2
-1.27869	1.61676	-9.29111	5.50488e-17	4.43014e-15	28.0354	14.3536	down	SLC29A4
-1.82824	1.36174	-9.29004	5.54225e-17	4.43947e-15	28.0288	14.3527	down	CPLX2
0.953909	2.39992	9.28894	5.58112e-17	4.44991e-15	28.0219	14.3516	up	C6orf132
1.61647	2.28293	9.27524	6.08557e-17	4.82976e-15	27.9371	14.3161	up	NMU
1.02511	2.89883	9.26975	6.30035e-17	4.97727e-15	27.9031	14.303	up	GNA15
1.0514	3.67321	9.26687	6.41585e-17	5.04538e-15	27.8853	14.2971	up	FAM83H
-1.05176	0.856003	-9.25563	6.88752e-17	5.39167e-15	27.8158	14.2683	down	OGDHL
1.48014	6.22188	9.2447	7.37953e-17	5.72671e-15	27.7482	14.2421	up	TM4SF1
-0.469478	1.94589	-9.24465	7.38201e-17	5.72671e-15	27.7478	14.2421	not-sig	SMAD4
0.817121	7.20881	9.24251	7.48225e-17	5.75722e-15	27.7346	14.2398	up	CLIC1
-0.758607	0.318661	-9.24238	7.48819e-17	5.75722e-15	27.7338	14.2398	down	AMER3
0.76583	5.34649	9.24021	7.59165e-17	5.81082e-15	27.7204	14.2358	up	MVP
1.02916	3.0792	9.2373	7.7323e-17	5.89229e-15	27.7024	14.2297	up	MDFI
0.934915	4.02717	9.23217	7.98642e-17	6.05912e-15	27.6707	14.2176	up	PCDH1
-0.391196	1.42427	-9.22875	8.16044e-17	6.164e-15	27.6496	14.2101	not-sig	RIC8B
1.93351	5.43903	9.22265	8.48051e-17	6.37779e-15	27.6119	14.1953	up	LAMC2
0.915382	5.70302	9.2196	8.64515e-17	6.47334e-15	27.593	14.1889	up	TMBIM1
-0.327415	2.12243	-9.21389	8.96218e-17	6.66223e-15	27.5578	14.1764	not-sig	RBM23
1.02516	6.66793	9.21367	8.97478e-17	6.66223e-15	27.5564	14.1764	up	EZR
-0.520046	2.29495	-9.2109	9.13273e-17	6.75038e-15	27.5393	14.1707	not-sig	PREPL
0.416175	3.67316	9.20872	9.25907e-17	6.81452e-15	27.5258	14.1666	not-sig	RELA
-0.583106	1.17776	-9.20612	9.4116e-17	6.8973e-15	27.5098	14.1613	down	SETBP1
-0.520603	1.75602	-9.1981	9.89972e-17	7.22428e-15	27.4603	14.1412	not-sig	FITM2
1.58904	5.44106	9.18447	1.0787e-16	7.83854e-15	27.3762	14.1058	up	CLDN4
1.62812	3.15953	9.17248	1.16325e-16	8.41744e-15	27.3022	14.0748	up	PROM2
0.720886	4.70348	9.16976	1.18333e-16	8.52689e-15	27.2854	14.0692	up	ANXA11
-1.07302	0.760076	-9.16425	1.22508e-16	8.79096e-15	27.2515	14.056	down	TUNAR
-2.4422	3.01251	-9.1633	1.23243e-16	8.80413e-15	27.2456	14.0553	down	SCGN
-0.401312	1.09865	-9.16269	1.23714e-16	8.80413e-15	27.2419	14.0553	not-sig	WDR7
-0.676393	0.413308	-9.15171	1.32558e-16	9.39473e-15	27.1742	14.0271	down	MTMR7
1.23795	5.06756	9.14814	1.35572e-16	9.53048e-15	27.1522	14.0209	up	TNFRSF12A
-0.919464	0.402039	-9.14813	1.35581e-16	9.53048e-15	27.1521	14.0209	down	GPR142
-0.883733	0.533419	-9.144	1.39142e-16	9.74107e-15	27.1267	14.0114	down	ADCY1
-2.28269	4.08642	-9.13738	1.45056e-16	1.0114e-14	27.0859	13.9951	down	SCG5
-0.332259	0.117442	-9.13031	1.5165e-16	1.05311e-14	27.0424	13.9775	not-sig	RGS22
1.40351	3.54592	9.11536	1.66579e-16	1.15214e-14	26.9504	13.9385	up	FOXQ1
-0.433639	2.53817	-9.1098	1.72495e-16	1.18828e-14	26.9162	13.9251	not-sig	ZNF24
0.794693	2.56401	9.09843	1.85261e-16	1.27114e-14	26.8462	13.8958	up	ARHGAP27
-0.466058	1.71223	-9.09768	1.86131e-16	1.27204e-14	26.8416	13.8955	not-sig	STXBP5
-0.786206	0.331953	-9.09267	1.92073e-16	1.30746e-14	26.8108	13.8836	down	TMEM132D
0.463821	3.53703	9.08914	1.96386e-16	1.33156e-14	26.7891	13.8756	not-sig	RNF149
-0.528463	0.240248	-9.08801	1.97773e-16	1.3357e-14	26.7822	13.8743	not-sig	ZNF483
-0.4344	0.198118	-9.07737	2.11429e-16	1.42236e-14	26.7168	13.847	not-sig	RAB39A
0.709895	1.09365	9.07437	2.15441e-16	1.4437e-14	26.6983	13.8405	up	EPHX4
-0.784622	0.387864	-9.06358	2.30513e-16	1.53872e-14	26.6321	13.8128	down	CELF4
-0.407081	0.21225	-9.05315	2.46084e-16	1.63632e-14	26.5681	13.7861	not-sig	MRO
-1.00545	0.877965	-9.0488	2.52883e-16	1.67506e-14	26.5414	13.776	down	PAK3
-0.46873	0.222038	-9.04564	2.57945e-16	1.70204e-14	26.5219	13.769	not-sig	KRT222
-0.731177	0.608337	-9.04413	2.60394e-16	1.71164e-14	26.5127	13.7666	down	DNAJC6
0.592301	6.86925	9.04315	2.61999e-16	1.71564e-14	26.5067	13.7656	up	PTMA
1.32187	5.64089	9.0418	2.6422e-16	1.72364e-14	26.4984	13.7636	up	CAPG
1.12768	2.5906	9.02446	2.94512e-16	1.914e-14	26.3921	13.7181	up	PPARG
-0.681264	0.295646	-9.01932	3.04148e-16	1.96918e-14	26.3605	13.7057	down	CDH10
-1.26608	2.12583	-9.01371	3.15007e-16	2.03186e-14	26.3262	13.6921	down	SLC7A2
-0.572775	3.74782	-9.00695	3.28618e-16	2.10478e-14	26.2847	13.6768	not-sig	USP22
-1.1755	1.54129	-9.00688	3.28758e-16	2.10478e-14	26.2843	13.6768	down	TMOD1
1.17239	3.80448	8.99863	3.46163e-16	2.208e-14	26.2338	13.656	up	NAPRT
-1.94461	2.11442	-8.99627	3.51319e-16	2.23262e-14	26.2193	13.6512	down	PTPRN
1.1004	4.29195	8.99479	3.54579e-16	2.24506e-14	26.2102	13.6488	up	PDLIM7
-0.871375	0.476579	-8.98636	3.73749e-16	2.35777e-14	26.1586	13.6275	down	RIPPLY2
1.05023	1.89987	8.98524	3.76388e-16	2.35906e-14	26.1518	13.6273	up	RNF39
-0.744699	1.20782	-8.98511	3.76694e-16	2.35906e-14	26.151	13.6273	down	SDK1
1.4136	4.50298	8.98319	3.81233e-16	2.37884e-14	26.1392	13.6236	up	B3GNT3
1.17364	5.81437	8.98175	3.84684e-16	2.39171e-14	26.1304	13.6213	up	LSR
-0.956632	3.65387	-8.9755	3.99994e-16	2.47795e-14	26.0922	13.6059	down	KCTD12
1.19532	3.89236	8.96912	4.16268e-16	2.56952e-14	26.0531	13.5901	up	PLAUR
1.94877	3.06695	8.96628	4.23695e-16	2.60603e-14	26.0358	13.584	up	TNS4
0.954271	3.02287	8.96467	4.27999e-16	2.62313e-14	26.0259	13.5812	up	EFNA4
1.27524	3.49419	8.95961	4.41727e-16	2.69767e-14	25.9949	13.569	up	LIPH
0.878553	5.11512	8.95882	4.43907e-16	2.7014e-14	25.9901	13.5684	up	VASP
-0.569415	1.39648	-8.95762	4.47232e-16	2.71205e-14	25.9828	13.5667	not-sig	TMEM38B
1.69451	5.24127	8.95666	4.49938e-16	2.71889e-14	25.9769	13.5656	up	IFI27
-0.422886	2.42242	-8.94624	4.80153e-16	2.89133e-14	25.9132	13.5389	not-sig	CBX5
0.699806	3.07857	8.9372	5.08032e-16	3.04855e-14	25.858	13.5159	up	POLD4
-0.464536	1.4555	-8.93406	5.18073e-16	3.098e-14	25.8388	13.5089	not-sig	ZBED3
-0.376052	0.156001	-8.92082	5.6263e-16	3.35281e-14	25.758	13.4746	not-sig	NLGN1
0.893992	2.06653	8.9194	5.67638e-16	3.37099e-14	25.7493	13.4722	up	SH3RF2
-1.36472	0.916765	-8.91171	5.95518e-16	3.5244e-14	25.7023	13.4529	down	VWA5B2
0.883978	1.98934	8.90773	6.10462e-16	3.60047e-14	25.678	13.4436	up	RHBDL2
-1.0683	1.36372	-8.89795	6.48817e-16	3.81363e-14	25.6184	13.4187	down	KCNJ11
-0.771186	0.293164	-8.88535	7.01762e-16	4.1108e-14	25.5415	13.3861	down	SLC7A14
-1.20949	0.949354	-8.8848	7.04158e-16	4.11085e-14	25.5382	13.3861	down	TAGLN3
-0.536433	3.72315	-8.8771	7.38691e-16	4.29789e-14	25.4913	13.3667	not-sig	PRPF8
1.67026	4.02812	8.8685	7.79291e-16	4.51884e-14	25.4389	13.345	up	GJB2
-0.371366	2.05422	-8.86734	7.84957e-16	4.53642e-14	25.4318	13.3433	not-sig	MOCS2
1.12007	3.36319	8.86479	7.9751e-16	4.58008e-14	25.4163	13.3391	up	TK1
-1.02839	0.628441	-8.86458	7.98562e-16	4.58008e-14	25.415	13.3391	down	LHFPL4
-0.482713	1.07301	-8.86393	8.01795e-16	4.58008e-14	25.411	13.3391	not-sig	GKAP1
-0.595851	1.30065	-8.86365	8.0315e-16	4.58008e-14	25.4094	13.3391	down	GPRIN3
-0.548746	0.459027	-8.85998	8.21713e-16	4.67048e-14	25.387	13.3306	not-sig	CNKSR2
1.19561	3.17071	8.84899	8.79829e-16	4.9703e-14	25.3201	13.3036	up	PRR15
3.21041	4.41752	8.8487	8.81379e-16	4.9703e-14	25.3183	13.3036	up	PSCA
-0.639289	2.10287	-8.84839	8.83121e-16	4.9703e-14	25.3164	13.3036	down	HIPK2
1.10018	2.66138	8.84512	9.01234e-16	5.05572e-14	25.2965	13.2962	up	ALS2CL
1.38308	6.41517	8.84001	9.30319e-16	5.20193e-14	25.2654	13.2838	up	LGALS3
-0.445799	1.74693	-8.83441	9.63221e-16	5.36847e-14	25.2314	13.2701	not-sig	DPH1
-0.40466	2.90339	-8.83323	9.70324e-16	5.39062e-14	25.2242	13.2684	not-sig	PPP3CB
-1.18256	0.611733	-8.83095	9.8413e-16	5.44974e-14	25.2103	13.2636	down	GPR119
0.96724	4.69907	8.81726	1.07146e-15	5.91431e-14	25.1271	13.2281	up	OCIAD2
-0.895945	1.15718	-8.81501	1.08649e-15	5.97814e-14	25.1134	13.2234	down	GNAO1
-0.310955	1.74297	-8.81376	1.09499e-15	6.0057e-14	25.1058	13.2214	not-sig	LYRM2
1.05467	1.77796	8.80129	1.18309e-15	6.4683e-14	25.03	13.1892	up	IGSF9
-1.01989	1.14226	-8.78735	1.28986e-15	7.02356e-14	24.9454	13.1534	down	FBXL16
1.1999	3.50128	8.78698	1.29281e-15	7.02356e-14	24.9432	13.1534	up	BIK
-0.567724	3.55215	-8.77992	1.35068e-15	7.31489e-14	24.9003	13.1358	not-sig	CREBL2
-0.383499	1.77563	-8.7781	1.36601e-15	7.37474e-14	24.8892	13.1323	not-sig	METTL16
-0.445029	1.65644	-8.77674	1.37754e-15	7.41374e-14	24.881	13.13	not-sig	ZHX3
-0.755117	0.558434	-8.76454	1.48567e-15	7.97077e-14	24.807	13.0985	down	PTGDR2
-0.746702	0.34644	-8.762	1.50921e-15	8.07191e-14	24.7916	13.093	down	FRRS1L
-2.15988	2.91323	-8.76076	1.52083e-15	8.1089e-14	24.7841	13.091	down	BEX1
-1.09158	1.52212	-8.75031	1.62249e-15	8.62424e-14	24.7207	13.0643	down	ISL1
-1.66327	1.44066	-8.74898	1.63588e-15	8.66868e-14	24.7127	13.062	down	HEPACAM2
-0.839157	0.869937	-8.74686	1.65748e-15	8.75617e-14	24.6998	13.0577	down	RADX
-0.731862	0.439406	-8.74203	1.70781e-15	8.99447e-14	24.6705	13.046	down	AP3B2
2.73604	5.88304	8.74085	1.72029e-15	9.01351e-14	24.6634	13.0451	up	KRT17
1.34423	5.15132	8.7407	1.72189e-15	9.01351e-14	24.6625	13.0451	up	ID1
-0.50327	0.211531	-8.73478	1.78615e-15	9.32155e-14	24.6266	13.0305	not-sig	PPM1E
0.734046	3.17856	8.73366	1.79856e-15	9.35797e-14	24.6198	13.0288	up	CKLF
-0.549453	1.47562	-8.7281	1.86148e-15	9.65614e-14	24.5862	13.0152	not-sig	SOCS2
-0.514254	2.04919	-8.72664	1.87837e-15	9.7145e-14	24.5773	13.0126	not-sig	KLHL42
-0.345066	1.28013	-8.72522	1.89487e-15	9.77048e-14	24.5688	13.0101	not-sig	KLHL15
1.63087	2.8845	8.72205	1.93245e-15	9.93455e-14	24.5495	13.0029	up	MYEOV
-0.435755	1.23026	-8.72103	1.94461e-15	9.96726e-14	24.5434	13.0014	not-sig	DNAJC18
1.33319	3.20755	8.71494	2.01923e-15	1.0319e-13	24.5065	12.9864	up	FA2H
0.708312	2.97103	8.71324	2.04061e-15	1.03974e-13	24.4962	12.9831	up	RARG
-0.872883	1.53145	-8.70934	2.09027e-15	1.06191e-13	24.4727	12.9739	down	RTL5
-0.425049	1.86141	-8.70789	2.10908e-15	1.06831e-13	24.4639	12.9713	not-sig	ZZEF1
-0.347585	2.06018	-8.70356	2.16624e-15	1.09405e-13	24.4377	12.961	not-sig	MAP2K4
-0.719304	0.284181	-8.69998	2.21474e-15	1.11527e-13	24.416	12.9526	down	HS6ST3
1.37265	4.09896	8.69472	2.28782e-15	1.14582e-13	24.3842	12.9409	up	SDCBP2
-1.02446	0.724948	-8.69466	2.28871e-15	1.14582e-13	24.3839	12.9409	down	CACNA1A
-0.502607	0.343104	-8.67416	2.59738e-15	1.29514e-13	24.26	12.8877	not-sig	FAM169A
-0.340977	1.80276	-8.67387	2.60201e-15	1.29514e-13	24.2583	12.8877	not-sig	LANCL2
-0.48281	2.60894	-8.67314	2.61373e-15	1.29722e-13	24.2539	12.887	not-sig	RABEP1
-0.671951	0.633676	-8.67077	2.65221e-15	1.30649e-13	24.2395	12.8839	down	MCOLN3
-1.04953	0.665013	-8.67064	2.65435e-15	1.30649e-13	24.2388	12.8839	down	SLC8A2
-0.42566	1.10775	-8.67059	2.65516e-15	1.30649e-13	24.2385	12.8839	not-sig	LNP1
1.16697	6.42963	8.67002	2.66451e-15	1.30736e-13	24.235	12.8836	up	SDC4
0.602793	6.2227	8.66816	2.69523e-15	1.31867e-13	24.2238	12.8799	up	PTTG1IP
-0.4464	0.288179	-8.66587	2.73358e-15	1.33364e-13	24.21	12.875	not-sig	FAM184A
-0.922755	0.64103	-8.66415	2.76285e-15	1.34412e-13	24.1995	12.8716	down	KCNJ3
-1.02435	3.69753	-8.66286	2.78481e-15	1.35098e-13	24.1918	12.8693	down	MAN1A1
-0.549819	0.204354	-8.65915	2.84926e-15	1.37837e-13	24.1694	12.8606	not-sig	BSN
-0.622534	3.19862	-8.65456	2.93105e-15	1.41397e-13	24.1417	12.8496	down	CERK
0.522781	6.10568	8.63777	3.25042e-15	1.56365e-13	24.0404	12.8059	not-sig	RAC1
-1.05166	2.82343	-8.6365	3.27603e-15	1.57158e-13	24.0327	12.8037	down	SLC7A8
-0.800992	3.27977	-8.61984	3.62993e-15	1.73652e-13	23.9323	12.7603	down	PAPSS2
1.22353	2.3321	8.61724	3.68837e-15	1.75959e-13	23.9167	12.7546	up	FOXL1
-0.365242	1.92817	-8.61228	3.80278e-15	1.80916e-13	23.8868	12.7425	not-sig	WDR37
-1.0057	0.930329	-8.60756	3.91474e-15	1.85729e-13	23.8584	12.7311	down	PLCXD3
-0.926956	0.618026	-8.5984	4.1415e-15	1.95947e-13	23.8032	12.7079	down	MARCH4
0.816597	1.97612	8.59739	4.16725e-15	1.96626e-13	23.7972	12.7064	up	SLC52A3
-0.426367	0.278326	-8.59113	4.33097e-15	2.03792e-13	23.7594	12.6908	not-sig	TMEM121B
-0.643165	0.235915	-8.59001	4.36084e-15	2.04639e-13	23.7527	12.689	down	MAP3K15
-1.02677	0.476145	-8.58876	4.39435e-15	2.05651e-13	23.7452	12.6869	down	ACTL6B
-0.629782	0.393287	-8.5879	4.41769e-15	2.06183e-13	23.74	12.6857	down	NOVA1
1.13617	3.90637	8.58697	4.44306e-15	2.06806e-13	23.7344	12.6844	up	LPCAT4
-0.788519	1.28652	-8.57419	4.80583e-15	2.23089e-13	23.6576	12.6515	down	MAP2
-0.740829	1.64359	-8.57052	4.91547e-15	2.27565e-13	23.6355	12.6429	down	NAP1L5
0.580645	6.53033	8.56919	4.95586e-15	2.2882e-13	23.6275	12.6405	up	CFL1
-1.69192	1.73193	-8.56808	4.98954e-15	2.29759e-13	23.6209	12.6387	down	APOH
-0.657692	0.53341	-8.56552	5.06869e-15	2.32781e-13	23.6055	12.6331	down	ENAM
0.981353	4.08472	8.56008	5.24064e-15	2.40038e-13	23.5728	12.6197	up	TRIP6
-0.320413	2.20623	-8.54977	5.58301e-15	2.55041e-13	23.5109	12.5934	not-sig	SPECC1L
-0.399648	1.50959	-8.54928	5.59997e-15	2.55139e-13	23.5079	12.5932	not-sig	KBTBD6
0.478137	5.11876	8.52908	6.33809e-15	2.88007e-13	23.3867	12.5406	not-sig	PPP1CA
0.736079	2.37751	8.52803	6.3793e-15	2.89117e-13	23.3804	12.5389	up	OSBPL3
1.06675	4.61746	8.52393	6.5413e-15	2.9568e-13	23.3558	12.5292	up	TSPAN15
-0.527077	0.189874	-8.52343	6.56137e-15	2.95811e-13	23.3528	12.529	not-sig	KCNJ6
-0.794358	0.780645	-8.52113	6.65467e-15	2.99234e-13	23.339	12.524	down	CHST9
-1.27082	1.3762	-8.51929	6.73023e-15	3.01844e-13	23.3279	12.5202	down	KCNK3
-0.643275	1.59013	-8.51882	6.74964e-15	3.01928e-13	23.3251	12.5201	down	ACACB
-1.4436	1.16709	-8.51739	6.80896e-15	3.03792e-13	23.3166	12.5174	down	GJD2
-1.06015	0.734566	-8.51622	6.85772e-15	3.05177e-13	23.3096	12.5154	down	SSTR2
-1.31561	1.0198	-8.50989	7.12896e-15	3.15756e-13	23.2716	12.5006	down	RUNDC3A
-0.619179	0.254796	-8.50982	7.1321e-15	3.15756e-13	23.2712	12.5006	down	FYB2
1.33132	4.11096	8.50445	7.37055e-15	3.24673e-13	23.239	12.4886	up	ACSL5
0.402749	1.71471	8.50443	7.37122e-15	3.24673e-13	23.2389	12.4886	not-sig	MEAK7
-1.29707	1.28785	-8.495	7.80932e-15	3.43092e-13	23.1824	12.4646	down	KIF1A
1.13225	3.5338	8.49016	8.04405e-15	3.52505e-13	23.1534	12.4528	up	ABHD17C
-1.29307	0.870908	-8.48792	8.15482e-15	3.56453e-13	23.14	12.448	down	ARX
1.18599	3.03602	8.48458	8.32335e-15	3.62898e-13	23.12	12.4402	up	INAVA
-0.933927	1.87929	-8.47619	8.76139e-15	3.81032e-13	23.0698	12.419	down	GNG2
-0.780246	1.88566	-8.47222	8.97662e-15	3.89409e-13	23.0461	12.4096	down	RPH3AL
0.859919	1.94207	8.46982	9.10929e-15	3.94171e-13	23.0317	12.4043	up	NGEF
-0.308884	2.36678	-8.46899	9.15555e-15	3.9518e-13	23.0267	12.4032	not-sig	ELMO2
1.01895	3.77959	8.46616	9.31529e-15	4.0107e-13	23.0098	12.3968	up	ERBB2
-0.440996	0.210626	-8.46538	9.35996e-15	4.01988e-13	23.0051	12.3958	not-sig	ASXL3
1.11607	4.28118	8.45198	1.01581e-14	4.35181e-13	22.925	12.3613	up	MYH14
1.99454	6.101	8.45101	1.02188e-14	4.36696e-13	22.9192	12.3598	up	MUC1
-0.634757	1.54006	-8.45024	1.02668e-14	4.37661e-13	22.9146	12.3589	down	TDRP
-1.30617	2.61786	-8.44851	1.03759e-14	4.41218e-13	22.9043	12.3553	down	BEX2
0.527521	2.87504	8.4437	1.06847e-14	4.53233e-13	22.8756	12.3437	not-sig	PML
-0.581276	0.690856	-8.43906	1.09921e-14	4.65124e-13	22.8478	12.3324	down	DTNA
-0.690242	1.15846	-8.43776	1.10794e-14	4.6767e-13	22.8401	12.3301	down	ARHGEF26
0.826962	4.36872	8.43233	1.14526e-14	4.82241e-13	22.8077	12.3167	up	F11R
-1.31242	1.36521	-8.4301	1.16095e-14	4.87654e-13	22.7944	12.3119	down	DUSP26
-1.06511	0.67848	-8.42926	1.16693e-14	4.88937e-13	22.7893	12.3107	down	CAMK2B
0.795521	1.6858	8.42887	1.16968e-14	4.88937e-13	22.787	12.3107	up	TMC7
0.743411	2.51663	8.42833	1.17358e-14	4.8938e-13	22.7838	12.3104	up	AFAP1L2
-0.682435	1.11074	-8.42722	1.18152e-14	4.91501e-13	22.7772	12.3085	down	NBEA
-0.680118	0.515139	-8.4255	1.19399e-14	4.95493e-13	22.7669	12.305	down	DSCAML1
1.65513	1.86178	8.42147	1.22372e-14	5.06608e-13	22.7428	12.2953	up	FAM83A
0.9688	3.45845	8.4183	1.24757e-14	5.15243e-13	22.7239	12.288	up	GALE
0.629602	3.3181	8.41206	1.29599e-14	5.33013e-13	22.6867	12.2733	up	EHD1
1.01127	5.68347	8.41195	1.29679e-14	5.33013e-13	22.6861	12.2733	up	CLTB
-0.553551	0.192875	-8.39653	1.42461e-14	5.84158e-13	22.5941	12.2335	not-sig	AVPR1B
0.935551	2.51746	8.39411	1.44571e-14	5.91401e-13	22.5797	12.2281	up	IGF2BP2
-1.37596	3.27194	-8.39055	1.47745e-14	6.02953e-13	22.5584	12.2197	down	PTPRN2
-0.604765	0.33051	-8.38734	1.50657e-14	6.13385e-13	22.5393	12.2123	down	TRIM9
-0.345249	0.10808	-8.38571	1.52159e-14	6.1804e-13	22.5296	12.209	not-sig	WNK3
0.505474	0.888937	8.38054	1.57023e-14	6.36294e-13	22.4988	12.1963	not-sig	RHOF
-0.432595	0.78639	-8.36715	1.70349e-14	6.88675e-13	22.4191	12.162	not-sig	USP51
-0.35178	1.79724	-8.36408	1.73563e-14	7.00024e-13	22.4009	12.1549	not-sig	FBXL17
-0.528602	0.812992	-8.35648	1.81772e-14	7.31419e-13	22.3556	12.1358	not-sig	ZNF540
-0.969241	2.77302	-8.35462	1.83837e-14	7.38003e-13	22.3446	12.1319	down	SELENOP
-0.518589	0.980853	-8.35368	1.84891e-14	7.40106e-13	22.339	12.1307	not-sig	MARK1
0.860338	6.11287	8.35339	1.8522e-14	7.40106e-13	22.3373	12.1307	up	H1F0
-0.405195	0.230768	-8.34978	1.89323e-14	7.53952e-13	22.3158	12.1227	not-sig	DMGDH
1.08133	4.42266	8.34937	1.898e-14	7.53952e-13	22.3134	12.1227	up	AGRN
0.829321	2.72395	8.34892	1.90315e-14	7.53952e-13	22.3107	12.1227	up	TMC6
1.65508	4.06775	8.34882	1.90436e-14	7.53952e-13	22.3101	12.1227	up	ITGB6
-1.48649	1.35294	-8.34691	1.92656e-14	7.60991e-13	22.2987	12.1186	down	PPP1R1A
0.611993	4.46578	8.34443	1.95577e-14	7.7076e-13	22.284	12.1131	up	TNKS1BP1
-0.398271	2.71398	-8.34367	1.96489e-14	7.72588e-13	22.2795	12.1121	not-sig	FXR2
0.478309	6.30535	8.34252	1.97859e-14	7.76202e-13	22.2727	12.11	not-sig	CHMP4B
-0.64459	2.79239	-8.34034	2.00498e-14	7.84766e-13	22.2597	12.1053	down	CYB5D2
-0.559532	2.00908	-8.33971	2.01264e-14	7.85979e-13	22.256	12.1046	not-sig	TMED8
-2.75502	3.78139	-8.33708	2.04503e-14	7.96822e-13	22.2404	12.0986	down	CHGB
1.00121	3.84065	8.33513	2.0695e-14	8.03824e-13	22.2287	12.0948	up	BAIAP2L1
1.38424	3.45036	8.33467	2.07517e-14	8.03824e-13	22.226	12.0948	up	FUT3
0.367261	1.88729	8.33453	2.077e-14	8.03824e-13	22.2252	12.0948	not-sig	PRICKLE3
0.362526	2.62031	8.33287	2.09805e-14	8.10147e-13	22.2153	12.0914	not-sig	RCE1
-0.437915	0.292345	-8.33195	2.10977e-14	8.1285e-13	22.2099	12.09	not-sig	CPEB1
-1.13697	0.923034	-8.32924	2.14481e-14	8.24505e-13	22.1937	12.0838	down	FFAR1
-1.37597	1.31087	-8.32342	2.22184e-14	8.52216e-13	22.1592	12.0695	down	TCEAL2
-0.730385	1.67347	-8.3203	2.26444e-14	8.66625e-13	22.1406	12.0622	down	EPB41L3
0.795088	3.48279	8.3189	2.28373e-14	8.7207e-13	22.1323	12.0594	up	TSKU
1.58558	4.81431	8.31009	2.4091e-14	9.1791e-13	22.0801	12.0372	up	PRSS8
-0.307098	1.63915	-8.29862	2.58263e-14	9.81854e-13	22.012	12.008	not-sig	PPM1D
-0.352035	2.15281	-8.29729	2.60341e-14	9.87577e-13	22.0042	12.0054	not-sig	MIS12
-0.83594	1.27985	-8.29618	2.6211e-14	9.92102e-13	21.9975	12.0034	down	PROX1
-0.601257	0.266638	-8.29299	2.67221e-14	1.00923e-12	21.9787	11.996	down	TMEM196
-0.692337	1.32594	-8.28872	2.74227e-14	1.03342e-12	21.9533	11.9857	down	SALL2
1.75701	3.40205	8.28582	2.79076e-14	1.0494e-12	21.9362	11.9791	up	ARL14
0.733892	3.49577	8.28131	2.86808e-14	1.07612e-12	21.9095	11.9681	up	DOK4
1.09537	2.63133	8.28079	2.87719e-14	1.0772e-12	21.9063	11.9677	up	GSDMB
-0.611311	0.551352	-8.27999	2.89112e-14	1.08006e-12	21.9016	11.9666	down	PCLO
-0.348939	1.95484	-8.27522	2.97586e-14	1.10931e-12	21.8734	11.9549	not-sig	C17orf80
0.744675	6.51425	8.27211	3.03245e-14	1.12797e-12	21.8549	11.9477	up	PKM
-1.31242	1.76952	-8.27088	3.05514e-14	1.13396e-12	21.8476	11.9454	down	WNT4
1.42168	5.02839	8.26513	3.16324e-14	1.17156e-12	21.8136	11.9312	up	NQO1
0.482813	2.3434	8.25985	3.26591e-14	1.20699e-12	21.7824	11.9183	not-sig	GTF2IRD1
-0.347514	1.54856	-8.25922	3.2785e-14	1.20856e-12	21.7786	11.9177	not-sig	ANKRD46
1.2523	5.20609	8.25893	3.28421e-14	1.20856e-12	21.7769	11.9177	up	RAB25
-0.492754	1.21806	-8.25843	3.29409e-14	1.20961e-12	21.774	11.9174	not-sig	TMOD2
0.608191	3.73344	8.25777	3.30731e-14	1.21188e-12	21.7701	11.9165	up	SFXN3
1.60136	5.34078	8.25693	3.32422e-14	1.21549e-12	21.7651	11.9152	up	FXYD3
-0.879854	1.61835	-8.25615	3.3399e-14	1.21864e-12	21.7605	11.9141	down	GPRASP1
1.1545	2.73069	8.25242	3.41608e-14	1.2438e-12	21.7384	11.9052	up	SLC39A4
1.2245	3.81102	8.24519	3.56878e-14	1.29666e-12	21.6956	11.8872	up	CBLC
-0.32311	1.63718	-8.2384	3.71827e-14	1.34813e-12	21.6555	11.8703	not-sig	ATG2B
-0.452379	3.17866	-8.2371	3.74752e-14	1.35588e-12	21.6478	11.8678	not-sig	COPS3
1.02058	2.72226	8.2358	3.77714e-14	1.36373e-12	21.6401	11.8653	up	UNC13D
-0.686727	1.85418	-8.23388	3.82111e-14	1.37672e-12	21.6288	11.8612	down	ABCA3
-0.415909	0.771026	-8.23261	3.85073e-14	1.3845e-12	21.6212	11.8587	not-sig	TMEM170B
-0.308271	1.2336	-8.22574	4.01381e-14	1.44012e-12	21.5807	11.8416	not-sig	SRR
-1.15902	0.96626	-8.22538	4.02244e-14	1.44022e-12	21.5786	11.8416	down	CDK5R2
0.517797	4.51268	8.22246	4.09413e-14	1.46284e-12	21.5613	11.8348	not-sig	PPP4C
-1.27465	0.772424	-8.21534	4.27384e-14	1.52389e-12	21.5193	11.817	down	TMEM179
-0.445721	0.236042	-8.21279	4.34018e-14	1.54435e-12	21.5042	11.8113	not-sig	SLCO5A1
0.545167	1.25381	8.20688	4.49785e-14	1.59716e-12	21.4693	11.7967	not-sig	ACY1
-0.313771	1.17638	-8.20591	4.52415e-14	1.60319e-12	21.4636	11.795	not-sig	ZNF181
-0.485226	1.9735	-8.20132	4.65121e-14	1.64483e-12	21.4365	11.7839	not-sig	KAT2B
-0.360898	2.14993	-8.19913	4.71301e-14	1.66327e-12	21.4236	11.779	not-sig	FBXO9
-0.318826	1.4417	-8.19711	4.77079e-14	1.68021e-12	21.4117	11.7746	not-sig	RWDD2A
-1.03336	3.63102	-8.19649	4.78869e-14	1.68308e-12	21.408	11.7739	down	BEX4
-0.496927	0.214332	-8.19555	4.81578e-14	1.68915e-12	21.4025	11.7723	not-sig	ADGRB3
0.917513	2.62062	8.16818	5.67942e-14	1.98803e-12	21.2412	11.7016	up	ZNF185
0.950813	1.77251	8.16484	5.79452e-14	2.0242e-12	21.2216	11.6937	up	MALL
1.32986	1.89043	8.16185	5.90005e-14	2.0569e-12	21.2039	11.6868	up	SCEL
-0.598871	0.203693	-8.15828	6.028e-14	2.09726e-12	21.1829	11.6783	down	XKR7
0.903447	2.47135	8.1574	6.06013e-14	2.10419e-12	21.1777	11.6769	up	LRFN4
-0.310331	2.2818	-8.15619	6.10451e-14	2.11239e-12	21.1706	11.6752	not-sig	FAM120B
-0.605795	2.36105	-8.15598	6.11221e-14	2.11239e-12	21.1694	11.6752	down	CBX7
-0.653041	0.471368	-8.15564	6.12462e-14	2.11239e-12	21.1674	11.6752	down	PACSIN1
0.621477	2.35723	8.15542	6.13281e-14	2.11239e-12	21.1661	11.6752	up	CDK18
-0.422781	1.52383	-8.1541	6.18148e-14	2.1249e-12	21.1583	11.6727	not-sig	COQ10A
-0.401043	1.16362	-8.15098	6.29882e-14	2.16092e-12	21.1399	11.6654	not-sig	ZFP3
-0.532448	2.09644	-8.13946	6.75051e-14	2.31128e-12	21.0722	11.6361	not-sig	MGAT4A
-0.405899	1.45703	-8.13624	6.8824e-14	2.35176e-12	21.0533	11.6286	not-sig	FICD
-0.57185	0.551785	-8.13569	6.90528e-14	2.35491e-12	21.0501	11.628	not-sig	MYRIP
0.736589	1.23572	8.13477	6.94378e-14	2.36335e-12	21.0446	11.6265	up	TFAP2A
-0.746026	1.69182	-8.13212	7.05509e-14	2.3965e-12	21.0291	11.6204	down	PRKAR2B
1.2744	3.33435	8.12863	7.20445e-14	2.44242e-12	21.0086	11.6122	up	LAMA3
-0.612824	0.931752	-8.12745	7.25594e-14	2.45505e-12	21.0016	11.6099	down	MAPK10
-0.608629	1.2513	-8.12624	7.30895e-14	2.46813e-12	20.9945	11.6076	down	CACNA1D
-1.2751	1.04135	-8.12504	7.36178e-14	2.47632e-12	20.9875	11.6062	down	SLC38A4
-0.444531	1.90126	-8.12504	7.36195e-14	2.47632e-12	20.9874	11.6062	not-sig	APH1B
1.24007	5.30059	8.11748	7.70395e-14	2.5862e-12	20.943	11.5873	up	MAL2
-0.892071	0.968303	-8.11716	7.71866e-14	2.5862e-12	20.9412	11.5873	down	GABRB3
-0.393151	1.63538	-8.1162	7.76342e-14	2.59615e-12	20.9355	11.5857	not-sig	MBP
1.04601	5.21469	8.115	7.81914e-14	2.60972e-12	20.9285	11.5834	up	FXYD5
0.937243	10.4486	8.11146	7.98726e-14	2.66067e-12	20.9077	11.575	up	TMSB10
0.675516	4.11342	8.10402	8.35182e-14	2.77674e-12	20.8641	11.5565	up	ZDHHC7
-0.402067	0.111307	-8.10177	8.46538e-14	2.80907e-12	20.8509	11.5514	not-sig	STXBP5L
-0.39436	2.67005	-8.09875	8.62018e-14	2.85494e-12	20.8331	11.5444	not-sig	ISCA1
-0.303181	0.94395	-8.09814	8.65218e-14	2.86004e-12	20.8295	11.5436	not-sig	BHLHB9
-0.495008	1.40771	-8.09721	8.70053e-14	2.87051e-12	20.8241	11.542	not-sig	CYP2U1
-0.956726	0.936418	-8.09594	8.76713e-14	2.88695e-12	20.8166	11.5396	down	ST8SIA3
-0.35273	2.40718	-8.09369	8.8863e-14	2.92061e-12	20.8034	11.5345	not-sig	ELP1
-0.785127	2.89986	-8.08427	9.40215e-14	3.08426e-12	20.7482	11.5108	down	ELL2
-0.651957	1.0003	-8.07325	1.00445e-13	3.28871e-12	20.6836	11.483	down	PDE3B
-0.482874	1.01356	-8.06808	1.036e-13	3.38344e-12	20.6534	11.4706	not-sig	RNF180
-0.530787	0.215158	-8.06787	1.03731e-13	3.38344e-12	20.6521	11.4706	not-sig	CNGA3
-0.923739	2.01479	-8.06729	1.04093e-13	3.38882e-12	20.6487	11.47	down	MAPK8IP1
0.899866	2.20086	8.05995	1.08771e-13	3.53445e-12	20.6058	11.4517	up	TMEM139
-0.62007	0.677768	-8.05802	1.10035e-13	3.56878e-12	20.5945	11.4475	down	ELOVL2
0.672219	3.42221	8.05379	1.1286e-13	3.65351e-12	20.5697	11.4373	up	TEAD3
0.735819	0.970291	8.04655	1.17854e-13	3.80605e-12	20.5273	11.4195	up	BEAN1
-0.433845	3.24551	-8.04616	1.18131e-13	3.80605e-12	20.525	11.4195	not-sig	PAIP2
-0.733333	3.87328	-8.04601	1.18235e-13	3.80605e-12	20.5242	11.4195	down	VAMP2
-0.282393	1.47439	-8.03807	1.23984e-13	3.98368e-12	20.4778	11.3997	not-sig	ZNF37A
2.16702	2.95459	8.03297	1.27827e-13	4.0995e-12	20.4479	11.3873	up	KLK7
-0.710805	0.644672	-8.03237	1.28283e-13	4.10647e-12	20.4444	11.3865	down	RIC3
-0.450044	0.296946	-8.03052	1.29711e-13	4.1445e-12	20.4336	11.3825	not-sig	NRG2
0.746864	6.00049	8.02519	1.33908e-13	4.27067e-12	20.4025	11.3695	up	CD151
0.798182	3.72938	8.02439	1.34552e-13	4.28328e-12	20.3978	11.3682	up	ARRDC1
-1.09079	1.00337	-8.01882	1.39103e-13	4.41999e-12	20.3653	11.3546	down	C1orf127
-0.328437	2.04348	-8.01753	1.40175e-13	4.44584e-12	20.3578	11.352	not-sig	DIS3L
0.627998	1.16861	8.01503	1.4229e-13	4.50268e-12	20.3431	11.3465	up	PKMYT1
-1.09714	1.22141	-8.01479	1.4249e-13	4.50268e-12	20.3418	11.3465	down	CNIH2
-0.528276	4.37807	-8.01253	1.44427e-13	4.55555e-12	20.3286	11.3415	not-sig	ACLY
-1.16597	1.99761	-8.01029	1.4637e-13	4.60567e-12	20.3155	11.3367	down	F10
-0.629489	0.989653	-8.01008	1.46551e-13	4.60567e-12	20.3143	11.3367	down	LONRF2
-1.26148	0.943163	-8.0097	1.46884e-13	4.6077e-12	20.3121	11.3365	down	SEZ6L
0.498787	2.9401	8.00597	1.50196e-13	4.70306e-12	20.2903	11.3276	not-sig	TTC7A
-1.16383	2.88961	-8.00529	1.50808e-13	4.71365e-12	20.2863	11.3266	down	UCHL1
-0.68019	0.522784	-8.0017	1.5407e-13	4.80686e-12	20.2654	11.3181	down	MAP7D2
0.595112	1.11654	7.99563	1.59754e-13	4.97519e-12	20.23	11.3032	up	CABP4
-0.831957	0.477769	-7.99255	1.62719e-13	5.0584e-12	20.212	11.296	down	NR0B1
-0.620752	2.23061	-7.99076	1.64468e-13	5.10023e-12	20.2015	11.2924	down	SESN1
0.66894	0.946014	7.99056	1.64657e-13	5.10023e-12	20.2004	11.2924	up	PSORS1C1
0.730904	7.66184	7.98284	1.72413e-13	5.32794e-12	20.1554	11.2734	up	TAGLN2
-0.871528	1.45919	-7.98264	1.72627e-13	5.32794e-12	20.1542	11.2734	down	GNAZ
-0.511676	1.33368	-7.98077	1.74561e-13	5.37799e-12	20.1433	11.2694	not-sig	ABCA5
0.87525	2.654	7.97145	1.84524e-13	5.67477e-12	20.0891	11.2461	up	TGFA
-0.622713	0.603303	-7.96889	1.87364e-13	5.75184e-12	20.0741	11.2402	down	NANOS1
-0.77402	0.63079	-7.96453	1.92296e-13	5.89275e-12	20.0487	11.2297	down	TMEM178B
-0.441727	1.97107	-7.96248	1.9465e-13	5.95427e-12	20.0368	11.2252	not-sig	SMCR8
-0.850701	2.60998	-7.96031	1.97181e-13	6.01898e-12	20.0242	11.2205	down	RAP1GAP2
-1.54116	4.27283	-7.96007	1.97464e-13	6.01898e-12	20.0228	11.2205	down	GPX3
0.829855	3.19541	7.95186	2.0736e-13	6.28971e-12	19.975	11.2014	up	LMO7
0.608369	3.58149	7.95185	2.0737e-13	6.28971e-12	19.975	11.2014	up	TRAF4
1.07201	3.20058	7.95179	2.07441e-13	6.28971e-12	19.9746	11.2014	up	BATF
-0.614585	3.04769	-7.95117	2.08213e-13	6.302e-12	19.971	11.2005	down	FNDC3A
-0.326587	1.4354	-7.95003	2.09626e-13	6.33364e-12	19.9644	11.1983	not-sig	KLHL8
-0.283253	1.00917	-7.94555	2.15287e-13	6.4933e-12	19.9383	11.1875	not-sig	C18orf32
0.972614	1.74071	7.93784	2.25397e-13	6.78633e-12	19.8935	11.1684	up	XDH
-0.399817	0.150788	-7.92429	2.44296e-13	7.34252e-12	19.8148	11.1342	not-sig	KSR2
-0.362471	1.66175	-7.91905	2.52022e-13	7.56155e-12	19.7843	11.1214	not-sig	USP30
-0.391517	1.30437	-7.91721	2.54795e-13	7.63143e-12	19.7737	11.1174	not-sig	CAMKK1
1.09917	1.16882	7.9143	2.59232e-13	7.75087e-12	19.7568	11.1106	up	ANXA8
-0.427201	1.54494	-7.91377	2.60048e-13	7.76178e-12	19.7537	11.11	not-sig	ZNF618
-0.361561	0.104611	-7.91234	2.62267e-13	7.81261e-12	19.7454	11.1072	not-sig	DDX25
-0.851977	0.97144	-7.91209	2.62658e-13	7.81261e-12	19.7439	11.1072	down	DIRAS1
1.10963	4.92545	7.91052	2.65124e-13	7.87236e-12	19.7348	11.1039	up	CYBA
0.60933	4.84178	7.90912	2.67337e-13	7.92439e-12	19.7267	11.101	up	CAPN2
1.17563	3.21686	7.90802	2.69089e-13	7.96263e-12	19.7203	11.0989	up	TJP3
-1.07709	1.68451	-7.90618	2.72047e-13	8.03637e-12	19.7096	11.0949	down	RAB26
-0.534077	1.00445	-7.90431	2.75072e-13	8.11179e-12	19.6988	11.0909	not-sig	RAPGEF4
1.07263	3.43676	7.90003	2.82148e-13	8.30623e-12	19.674	11.0806	up	MPZL2
-1.03532	0.80268	-7.89897	2.83927e-13	8.34436e-12	19.6679	11.0786	down	KCNA5
0.879232	3.85934	7.89802	2.85541e-13	8.37749e-12	19.6623	11.0769	up	EPS8L2
-0.702975	1.55113	-7.89429	2.91925e-13	8.55022e-12	19.6407	11.068	down	SERPINI1
-0.361748	1.73603	-7.88746	3.03999e-13	8.88875e-12	19.6011	11.0512	not-sig	ME2
-0.460074	1.36628	-7.88712	3.04608e-13	8.89145e-12	19.5991	11.051	not-sig	REV3L
0.472184	2.13837	7.88518	3.08141e-13	8.97936e-12	19.5879	11.0468	not-sig	TMEM44
0.595994	9.88267	7.88482	3.08786e-13	8.98297e-12	19.5858	11.0466	up	ACTB
-1.13251	3.11488	-7.87408	3.29079e-13	9.55717e-12	19.5236	11.0197	down	PARM1
-0.939786	0.943216	-7.87326	3.30697e-13	9.57967e-12	19.5188	11.0186	down	LRRC10B
0.845286	1.83098	7.87312	3.30966e-13	9.57967e-12	19.518	11.0186	up	IQGAP3
-0.562313	0.381906	-7.87258	3.32032e-13	9.59438e-12	19.5149	11.018	not-sig	EFR3B
-1.10863	1.30338	-7.87101	3.35124e-13	9.6675e-12	19.5058	11.0147	down	ADCYAP1
0.826437	1.34113	7.8704	3.36339e-13	9.68633e-12	19.5023	11.0138	up	OVOL1
2.16834	3.36081	7.86725	3.42672e-13	9.85225e-12	19.4841	11.0065	up	KLK6
-0.329979	1.91551	-7.85973	3.58273e-13	1.02836e-11	19.4406	10.9879	not-sig	APPBP2
0.903368	3.94331	7.85549	3.67376e-13	1.05274e-11	19.416	10.9777	up	SEMA4B
-0.883457	2.25542	-7.85504	3.68358e-13	1.0538e-11	19.4134	10.9772	down	TSPAN33
0.88668	3.58534	7.85352	3.71703e-13	1.0616e-11	19.4046	10.974	up	FHL2
-0.335455	2.46959	-7.85287	3.7313e-13	1.06391e-11	19.4009	10.9731	not-sig	ASB8
-0.992367	3.95097	-7.84175	3.98491e-13	1.13377e-11	19.3366	10.9455	down	METTL7A
-0.36256	1.42767	-7.84156	3.98946e-13	1.13377e-11	19.3355	10.9455	not-sig	KBTBD7
-0.774344	0.306755	-7.84001	4.02622e-13	1.14233e-11	19.3265	10.9422	down	GALNT8
-0.489404	3.33393	-7.8379	4.07684e-13	1.15479e-11	19.3143	10.9375	not-sig	PRPS1
-0.67924	2.43304	-7.82505	4.39842e-13	1.24384e-11	19.2401	10.9052	down	TENT5A
-0.53024	0.513993	-7.82449	4.41294e-13	1.24589e-11	19.2369	10.9045	not-sig	CSRNP3
-1.68827	1.88553	-7.82247	4.46607e-13	1.25883e-11	19.2252	10.9	down	UCN3
0.737966	3.67706	7.82	4.53163e-13	1.27523e-11	19.211	10.8944	up	PRXL2B
1.06421	3.82147	7.81968	4.54032e-13	1.27559e-11	19.2091	10.8943	up	ANO1
-0.486748	1.16119	-7.81284	4.72732e-13	1.32596e-11	19.1697	10.8775	not-sig	SYNE1
-0.978794	1.23522	-7.81012	4.80383e-13	1.34523e-11	19.154	10.8712	down	NKX6-1
1.01432	2.63075	7.80806	4.86265e-13	1.35949e-11	19.1421	10.8666	up	BICDL2
0.503975	1.40524	7.80565	4.93216e-13	1.37669e-11	19.1282	10.8612	not-sig	GPR39
-0.28312	1.45722	-7.80462	4.96231e-13	1.38286e-11	19.1223	10.8592	not-sig	ZBTB24
-0.772244	0.756158	-7.79628	5.21259e-13	1.45026e-11	19.0742	10.8386	down	NAT8L
0.610729	4.64919	7.79576	5.22869e-13	1.4524e-11	19.0712	10.8379	up	SLC44A2
-0.89828	0.688397	-7.79057	5.39121e-13	1.49513e-11	19.0413	10.8253	down	KL
0.761443	6.10765	7.78813	5.46926e-13	1.51433e-11	19.0272	10.8198	up	CIB1
0.840026	3.21615	7.78775	5.48164e-13	1.51433e-11	19.025	10.8198	up	IL18
-0.727467	2.848	-7.78759	5.48683e-13	1.51433e-11	19.0241	10.8198	down	CD99L2
-0.867822	2.73122	-7.78657	5.51984e-13	1.521e-11	19.0182	10.8179	down	ATP6V0E2
-0.334706	1.53533	-7.78614	5.53382e-13	1.52117e-11	19.0158	10.8178	not-sig	CLASP2
-0.798058	2.93021	-7.78601	5.5381e-13	1.52117e-11	19.015	10.8178	down	QDPR
0.578021	1.00188	7.78441	5.5906e-13	1.53314e-11	19.0058	10.8144	not-sig	MMEL1
-0.41999	1.78761	-7.78239	5.65753e-13	1.54903e-11	18.9942	10.8099	not-sig	HERC1
-0.52279	1.83402	-7.7808	5.71081e-13	1.56114e-11	18.985	10.8066	not-sig	PLCL2
-0.450125	4.14544	-7.77914	5.76672e-13	1.57392e-11	18.9755	10.803	not-sig	ALKBH5
-0.595052	2.10209	-7.77861	5.78496e-13	1.57536e-11	18.9724	10.8026	down	MTURN
-0.373626	0.402216	-7.77845	5.79029e-13	1.57536e-11	18.9715	10.8026	not-sig	ZNF843
-0.379807	1.30125	-7.77801	5.80554e-13	1.57702e-11	18.9689	10.8022	not-sig	ZNF253
0.531288	3.07538	7.77101	6.04972e-13	1.64076e-11	18.9287	10.785	not-sig	ZDHHC3
0.747765	6.13718	7.77012	6.08172e-13	1.64685e-11	18.9235	10.7833	up	VAMP8
0.484618	4.19308	7.76918	6.11536e-13	1.65336e-11	18.9182	10.7816	not-sig	RALB
1.30101	4.57342	7.76099	6.4174e-13	1.73083e-11	18.8711	10.7617	up	KLF5
0.585973	4.33962	7.76087	6.42201e-13	1.73083e-11	18.8704	10.7617	up	TWF2
-0.780697	1.45362	-7.75983	6.46148e-13	1.73875e-11	18.8644	10.7598	down	TOX
-0.367804	1.58754	-7.75747	6.55166e-13	1.76026e-11	18.8508	10.7544	not-sig	CYB561D1
0.928949	4.98141	7.75592	6.61199e-13	1.7737e-11	18.8419	10.7511	up	CNN2
0.603549	2.53004	7.75488	6.65238e-13	1.78176e-11	18.8359	10.7492	up	ZWINT
-0.718301	0.411782	-7.74956	6.86391e-13	1.83556e-11	18.8054	10.7362	down	SPTBN4
0.562943	2.30186	7.74465	7.06487e-13	1.88638e-11	18.7772	10.7244	not-sig	FAM110A
0.911377	5.76968	7.74105	7.21618e-13	1.92379e-11	18.7565	10.7158	up	LDHA
-0.512481	2.39864	-7.74031	7.24745e-13	1.92914e-11	18.7522	10.7146	not-sig	TOM1L2
0.581707	3.57795	7.73815	7.34036e-13	1.95086e-11	18.7398	10.7098	up	RNPEPL1
-0.711182	2.78888	-7.73505	7.4752e-13	1.98363e-11	18.722	10.7025	down	CBX6
-0.33355	2.79003	-7.73333	7.55115e-13	2.00071e-11	18.7121	10.6988	not-sig	OAZ2
-1.00338	2.34009	-7.73157	7.62951e-13	2.01836e-11	18.7021	10.695	down	SCAMP5
-0.491179	2.79668	-7.72947	7.72425e-13	2.04029e-11	18.69	10.6903	not-sig	MAPRE2
1.31902	4.55567	7.72762	7.80882e-13	2.05947e-11	18.6794	10.6862	up	MISP
-0.556424	0.388516	-7.72311	8.01824e-13	2.10891e-11	18.6535	10.6759	not-sig	MYO3A
-0.813312	1.05078	-7.72306	8.02076e-13	2.10891e-11	18.6532	10.6759	down	ADGRG5
-0.643865	1.95563	-7.72264	8.04048e-13	2.11087e-11	18.6508	10.6755	down	MOB1B
-0.433034	2.41532	-7.71981	8.17516e-13	2.14296e-11	18.6346	10.669	not-sig	SIK2
1.29957	3.93471	7.71935	8.19744e-13	2.14554e-11	18.6319	10.6685	up	ECM1
0.408157	3.31759	7.71882	8.2229e-13	2.14678e-11	18.6289	10.6682	not-sig	DPP3
-0.273613	1.5923	-7.71873	8.22711e-13	2.14678e-11	18.6284	10.6682	not-sig	ZNF641
1.05915	2.08015	7.71841	8.24247e-13	2.14753e-11	18.6266	10.6681	up	ABO
0.665989	1.99998	7.71655	8.3331e-13	2.16786e-11	18.6159	10.664	up	ABTB2
-0.533848	1.34746	-7.71403	8.45753e-13	2.19692e-11	18.6014	10.6582	not-sig	PPM1K
0.669135	2.00884	7.71088	8.61542e-13	2.23456e-11	18.5833	10.6508	up	TRIM16
0.705694	0.823834	7.69811	9.28525e-13	2.40467e-11	18.5102	10.6189	up	ZNF488
-0.375966	0.7493	-7.69663	9.36612e-13	2.42197e-11	18.5017	10.6158	not-sig	FSD1L
-0.34061	1.32934	-7.688	9.85205e-13	2.54381e-11	18.4523	10.5945	not-sig	ULK2
0.338714	3.73893	7.68231	1.01865e-12	2.62622e-11	18.4197	10.5807	not-sig	RNF7
1.00449	1.15796	7.67535	1.06101e-12	2.73135e-11	18.3799	10.5636	up	COX6B2
-0.435527	0.48754	-7.66336	1.13817e-12	2.92561e-11	18.3114	10.5338	not-sig	ZNF667
-1.3554	1.44991	-7.66288	1.14134e-12	2.92939e-11	18.3087	10.5332	down	C1QL1
0.416897	4.61518	7.66161	1.14989e-12	2.94693e-11	18.3014	10.5306	not-sig	CHMP1A
-0.710034	0.895031	-7.66016	1.15964e-12	2.96751e-11	18.2931	10.5276	down	MPP2
-0.413204	2.16432	-7.65262	1.21192e-12	3.0967e-11	18.2501	10.5091	not-sig	CNOT6L
-0.347323	1.37677	-7.64751	1.24871e-12	3.18597e-11	18.2209	10.4968	not-sig	LYRM7
-0.552075	0.901895	-7.64281	1.28345e-12	3.26976e-11	18.1941	10.4855	not-sig	RNF150
-0.272213	1.48951	-7.64055	1.30056e-12	3.30844e-11	18.1811	10.4804	not-sig	TMEM192
0.82593	5.37885	7.6348	1.34493e-12	3.41629e-11	18.1484	10.4664	up	EFHD2
0.650356	5.04325	7.63367	1.35389e-12	3.43398e-11	18.1419	10.4642	up	BCL2L1
-0.741929	0.792413	-7.6328	1.3608e-12	3.44643e-11	18.1369	10.4626	down	A1CF
0.709378	3.19091	7.63122	1.37335e-12	3.47311e-11	18.128	10.4593	up	SMAD3
-0.477743	2.1923	-7.62437	1.42938e-12	3.60951e-11	18.0889	10.4426	not-sig	TBL1X
1.0911	3.03707	7.62378	1.43435e-12	3.61675e-11	18.0855	10.4417	up	BMP4
0.446879	2.37702	7.62191	1.45009e-12	3.65109e-11	18.0749	10.4376	not-sig	TMEM189
-0.445956	2.24139	-7.62125	1.45569e-12	3.65984e-11	18.0711	10.4365	not-sig	CDS2
-0.809895	1.04972	-7.61994	1.46686e-12	3.68256e-11	18.0636	10.4339	down	MSI1
1.6109	3.50264	7.61219	1.53473e-12	3.84732e-11	18.0195	10.4148	up	CAPN8
1.19171	3.8212	7.61172	1.53893e-12	3.85225e-11	18.0168	10.4143	up	KRTCAP3
-0.464542	2.46199	-7.61035	1.55127e-12	3.87749e-11	18.009	10.4114	not-sig	ACADM
-1.3863	3.14081	-7.60974	1.55681e-12	3.8857e-11	18.0055	10.4105	down	RASD1
0.848143	3.69944	7.60418	1.60807e-12	4.00783e-11	17.9739	10.3971	up	ELMO3
0.76024	3.54686	7.60364	1.61318e-12	4.01477e-11	17.9708	10.3963	up	TNFRSF10B
-0.348081	0.19545	-7.6022	1.62678e-12	4.04276e-11	17.9626	10.3933	not-sig	ZNF727
0.730353	2.54755	7.6009	1.63916e-12	4.06767e-11	17.9552	10.3907	up	ABLIM3
-0.507329	0.464486	-7.59995	1.64824e-12	4.08431e-11	17.9498	10.3889	not-sig	CCDC110
-0.455846	3.82094	-7.59893	1.65808e-12	4.1028e-11	17.944	10.3869	not-sig	TSPYL1
0.42345	2.65604	7.5972	1.67487e-12	4.1384e-11	17.9342	10.3832	not-sig	ACOT9
-0.683086	1.47823	-7.59519	1.69464e-12	4.18124e-11	17.9227	10.3787	down	ATP8A1
1.12111	3.31696	7.59477	1.69875e-12	4.1854e-11	17.9203	10.3783	up	HK2
-0.828487	0.687306	-7.59224	1.72393e-12	4.24136e-11	17.906	10.3725	down	BMP5
-0.558591	0.74691	-7.59098	1.73667e-12	4.26662e-11	17.8988	10.3699	not-sig	HPCA
-0.468274	0.482705	-7.58908	1.75599e-12	4.30793e-11	17.888	10.3657	not-sig	KCNN3
0.6101	4.87394	7.58773	1.7699e-12	4.33589e-11	17.8803	10.3629	up	GUK1
0.68353	3.27064	7.58094	1.84118e-12	4.5041e-11	17.8417	10.3464	up	PIEZO1
-0.689886	0.898623	-7.57894	1.86278e-12	4.55048e-11	17.8303	10.3419	down	AMPH
-0.552437	0.334551	-7.57562	1.89914e-12	4.63273e-11	17.8115	10.3342	not-sig	POU6F2
1.01588	4.64022	7.56653	2.00229e-12	4.87743e-11	17.7598	10.3118	up	FLNB
-1.59722	2.54397	-7.56516	2.01825e-12	4.90937e-11	17.7521	10.309	down	APLP1
0.726272	6.56513	7.56484	2.02202e-12	4.91161e-11	17.7502	10.3088	up	ALDOA
0.856824	3.45834	7.56452	2.0258e-12	4.91384e-11	17.7484	10.3086	up	CDCP1
-0.605584	0.58875	-7.56041	2.07475e-12	5.0255e-11	17.7251	10.2988	down	RGS7
-0.443055	1.50965	-7.55772	2.10753e-12	5.09774e-11	17.7098	10.2926	not-sig	SSX2IP
-0.680941	0.333867	-7.55638	2.12402e-12	5.13042e-11	17.7022	10.2898	down	KIF19
-0.36481	1.04145	-7.55467	2.14518e-12	5.17426e-11	17.6925	10.2862	not-sig	ZNF287
-0.607224	0.472019	-7.55057	2.19698e-12	5.29181e-11	17.6692	10.2764	down	LRRN3
-1.7898	1.79044	-7.54843	2.22445e-12	5.35049e-11	17.6571	10.2716	down	KCNK16
-0.852462	1.74283	-7.548	2.22996e-12	5.35625e-11	17.6547	10.2711	down	ABAT
1.24389	1.67527	7.54292	2.2968e-12	5.50913e-11	17.6259	10.2589	up	UGT1A10
-0.56882	1.04077	-7.54146	2.31636e-12	5.54832e-11	17.6176	10.2558	not-sig	MAGEE1
-0.674112	0.315415	-7.54015	2.33394e-12	5.58266e-11	17.6102	10.2532	down	LGI3
0.54715	2.28052	7.53737	2.3719e-12	5.66559e-11	17.5944	10.2468	not-sig	PAQR4
-0.633036	0.266736	-7.53625	2.38739e-12	5.69467e-11	17.5881	10.2445	down	SLC6A4
-0.898352	1.10645	-7.53563	2.39609e-12	5.70753e-11	17.5845	10.2436	down	MAPK8IP2
0.951294	3.08222	7.53428	2.41495e-12	5.7445e-11	17.5769	10.2407	up	GRB7
0.544564	2.35304	7.53383	2.42114e-12	5.75129e-11	17.5744	10.2402	not-sig	MPZL3
1.1172	3.79107	7.53192	2.44819e-12	5.80755e-11	17.5635	10.236	up	MLPH
-0.972175	1.43178	-7.5312	2.45849e-12	5.82396e-11	17.5594	10.2348	down	MMRN1
-1.21901	0.689011	-7.53071	2.46544e-12	5.83239e-11	17.5567	10.2342	down	IRX2
-0.314897	1.43788	-7.53026	2.47185e-12	5.83954e-11	17.5542	10.2336	not-sig	RXYLT1
-0.496393	0.215312	-7.52955	2.48211e-12	5.85573e-11	17.5501	10.2324	not-sig	PLPPR1
1.08082	3.56988	7.5292	2.48713e-12	5.85956e-11	17.5481	10.2321	up	MET
0.595137	3.72377	7.52812	2.50277e-12	5.88834e-11	17.542	10.23	up	EHBP1L1
1.12061	4.26909	7.52742	2.51291e-12	5.90414e-11	17.5381	10.2288	up	PLBD1
-0.96537	1.8643	-7.52655	2.52562e-12	5.92591e-11	17.5332	10.2272	down	PNMA8A
-0.592184	1.98872	-7.52631	2.52913e-12	5.92607e-11	17.5318	10.2272	down	FAM117A
0.484956	4.47437	7.52576	2.53726e-12	5.93706e-11	17.5287	10.2264	not-sig	LYPLA2
1.1219	2.36951	7.52473	2.55255e-12	5.96473e-11	17.5228	10.2244	up	OASL
-0.519173	2.27505	-7.51641	2.67863e-12	6.25087e-11	17.4757	10.2041	not-sig	ATP2B1
-0.532667	0.29316	-7.51446	2.70903e-12	6.31325e-11	17.4647	10.1997	not-sig	NIM1K
-0.780159	0.589586	-7.51272	2.73651e-12	6.36866e-11	17.4549	10.196	down	RXRG
1.16833	5.68748	7.51205	2.74727e-12	6.38509e-11	17.451	10.1948	up	APOL1
-0.383421	0.235764	-7.50941	2.78952e-12	6.47454e-11	17.4361	10.1888	not-sig	DLG2
-0.420129	2.16078	-7.50559	2.85196e-12	6.61056e-11	17.4145	10.1798	not-sig	TEX2
-0.680234	1.02082	-7.49944	2.95543e-12	6.83434e-11	17.3797	10.1653	down	KCNMA1
-0.299831	0.0917517	-7.49938	2.95644e-12	6.83434e-11	17.3794	10.1653	not-sig	OXGR1
-0.727102	0.495779	-7.49888	2.96505e-12	6.84506e-11	17.3766	10.1646	down	PRLR
-0.336034	1.94324	-7.49311	3.06576e-12	7.06808e-11	17.344	10.1507	not-sig	SIK3
-0.344124	2.17538	-7.49237	3.07887e-12	7.08882e-11	17.3398	10.1494	not-sig	FAM122A
-0.285221	1.75003	-7.49107	3.10216e-12	7.1329e-11	17.3325	10.1467	not-sig	SRBD1
-0.485393	1.29216	-7.48861	3.14663e-12	7.22551e-11	17.3186	10.1411	not-sig	C3orf14
-0.390255	1.17416	-7.48768	3.16361e-12	7.25482e-11	17.3133	10.1394	not-sig	ZNF441
0.614418	3.31473	7.48721	3.17224e-12	7.26495e-11	17.3106	10.1388	up	TRADD
-0.725551	0.754799	-7.48641	3.187e-12	7.28095e-11	17.3061	10.1378	down	KIF5A
-0.461402	2.22467	-7.48637	3.18769e-12	7.28095e-11	17.3059	10.1378	not-sig	JADE1
-1.89624	2.10197	-7.48125	3.28349e-12	7.48879e-11	17.277	10.1256	down	SLC30A8
1.16173	7.49617	7.48105	3.28738e-12	7.48879e-11	17.2759	10.1256	up	KRT8
0.577028	2.21685	7.48065	3.29485e-12	7.49589e-11	17.2736	10.1252	not-sig	EPHA1
1.75046	2.96162	7.47933	3.32012e-12	7.54341e-11	17.2662	10.1224	up	SYT8
-0.400677	2.13954	-7.47669	3.37125e-12	7.64949e-11	17.2513	10.1164	not-sig	SUOX
1.26826	2.62992	7.47157	3.47265e-12	7.86922e-11	17.2223	10.1041	up	SDR16C5
-1.69712	1.62102	-7.4652	3.60283e-12	8.15348e-11	17.1864	10.0887	down	G6PC2
0.867149	5.36762	7.46409	3.62593e-12	8.19151e-11	17.1802	10.0866	up	SPINT1
-0.31064	1.99777	-7.46394	3.62915e-12	8.19151e-11	17.1793	10.0866	not-sig	NLK
0.344156	2.49817	7.46337	3.64102e-12	8.20754e-11	17.1761	10.0858	not-sig	ATG16L1
-0.563103	1.64915	-7.46056	3.70071e-12	8.33119e-11	17.1603	10.0793	not-sig	SLC26A11
-0.407434	0.116946	-7.45798	3.75612e-12	8.44489e-11	17.1458	10.0734	not-sig	FAM135B
0.82838	2.99895	7.45489	3.82378e-12	8.5858e-11	17.1283	10.0662	up	TRPM4
-0.68443	1.00527	-7.45326	3.86009e-12	8.65606e-11	17.1191	10.0627	down	DACH1
1.82672	4.40806	7.45168	3.89536e-12	8.72377e-11	17.1102	10.0593	up	CRABP2
0.660851	2.0777	7.45122	3.90576e-12	8.7357e-11	17.1076	10.0587	up	OPLAH
-1.1623	3.73079	-7.44989	3.93583e-12	8.78475e-11	17.1002	10.0563	down	ATP2A3
0.506441	2.34883	7.4498	3.93789e-12	8.78475e-11	17.0996	10.0563	not-sig	SIRT7
0.883192	5.36417	7.43857	4.20146e-12	9.36062e-11	17.0364	10.0287	up	PERP
0.710836	6.34933	7.43782	4.21966e-12	9.38902e-11	17.0322	10.0274	up	TXN
-0.355308	1.18743	-7.43756	4.22607e-12	9.39111e-11	17.0307	10.0273	not-sig	IKZF4
-0.581737	0.332559	-7.43734	4.23151e-12	9.39111e-11	17.0295	10.0273	down	MAPK4
-0.625661	0.689457	-7.42972	4.42138e-12	9.7892e-11	16.9866	10.0093	down	PHYHIPL
-0.353326	0.219705	-7.42969	4.42225e-12	9.7892e-11	16.9864	10.0093	not-sig	ESR1
-0.347478	1.20181	-7.42906	4.43837e-12	9.81227e-11	16.9829	10.0082	not-sig	SP4
-0.428894	0.171637	-7.4244	4.55922e-12	1.00665e-10	16.9567	9.99712	not-sig	GRM4
0.665	2.139	7.42292	4.59824e-12	1.01244e-10	16.9484	9.99463	up	SEC14L2
0.83156	4.26362	7.42274	4.60302e-12	1.01244e-10	16.9473	9.99463	up	KIAA1522
0.544669	2.03064	7.42274	4.60305e-12	1.01244e-10	16.9473	9.99463	not-sig	SAMD10
0.654379	3.40872	7.4212	4.64411e-12	1.02016e-10	16.9387	9.99133	up	EPB41L1
-0.628588	1.67137	-7.42067	4.65824e-12	1.02197e-10	16.9357	9.99056	down	CADM1
-0.538766	0.203003	-7.42019	4.67123e-12	1.02351e-10	16.933	9.98991	not-sig	PPP4R4
0.793739	2.74596	7.41989	4.67916e-12	1.02394e-10	16.9313	9.98972	up	SH2D4A
-0.545412	1.36492	-7.41617	4.78058e-12	1.04481e-10	16.9104	9.98096	not-sig	AMIGO1
0.755033	4.68537	7.41341	4.85707e-12	1.06018e-10	16.8949	9.97462	up	PPP1R14B
-0.600945	2.18738	-7.41153	4.90999e-12	1.07038e-10	16.8843	9.97046	down	RGL1
-0.364111	0.113179	-7.4098	4.95925e-12	1.07975e-10	16.8746	9.96668	not-sig	SYT14
1.27946	5.10577	7.40957	4.96559e-12	1.07977e-10	16.8734	9.96667	up	ELF3
-0.204175	1.60741	-7.40848	4.9969e-12	1.0852e-10	16.8672	9.96449	not-sig	C2orf42
-0.333037	1.85694	-7.40215	5.1824e-12	1.12407e-10	16.8317	9.94921	not-sig	FECH
0.643041	2.17386	7.40139	5.2051e-12	1.12758e-10	16.8274	9.94785	up	ASF1B
-0.279636	1.31813	-7.4008	5.22265e-12	1.12996e-10	16.8241	9.94694	not-sig	CRADD
0.587071	3.7941	7.40008	5.24446e-12	1.13325e-10	16.82	9.94567	up	HTATIP2
-0.372425	2.25614	-7.39694	5.33991e-12	1.15226e-10	16.8024	9.93845	not-sig	IGIP
1.36753	1.58821	7.39675	5.34581e-12	1.15226e-10	16.8014	9.93845	up	GPR87
-0.580218	3.37716	-7.39558	5.38212e-12	1.15864e-10	16.7948	9.93605	down	SLC39A6
-0.345768	1.44972	-7.39317	5.45724e-12	1.17275e-10	16.7812	9.93079	not-sig	EPG5
-0.427661	0.97192	-7.39304	5.46131e-12	1.17275e-10	16.7805	9.93079	not-sig	HECW2
-0.878563	0.594855	-7.3923	5.48462e-12	1.17629e-10	16.7764	9.92949	down	SYNGR4
-0.639673	1.06644	-7.38998	5.55827e-12	1.1906e-10	16.7633	9.92423	down	USP2
0.479587	3.91692	7.38428	5.74309e-12	1.22866e-10	16.7314	9.91057	not-sig	CORO1B
-0.277332	1.81067	-7.38325	5.77746e-12	1.23448e-10	16.7256	9.90851	not-sig	ZNF740
0.72571	2.27974	7.37812	5.95014e-12	1.26981e-10	16.6969	9.89626	up	IRAK2
-0.531941	0.837885	-7.37639	6.00974e-12	1.28094e-10	16.6872	9.89247	not-sig	CAND2
0.591932	3.68023	7.37492	6.06047e-12	1.29015e-10	16.679	9.88936	up	SPATS2L
0.762988	4.07345	7.37366	6.1045e-12	1.29792e-10	16.6719	9.88675	up	PHLDA3
-0.351781	2.29689	-7.371	6.19855e-12	1.31629e-10	16.657	9.88065	not-sig	TIMM22
0.704326	1.04035	7.36309	6.48646e-12	1.37574e-10	16.6127	9.86146	up	TRIM7
0.837493	2.09225	7.35455	6.81237e-12	1.44308e-10	16.5649	9.84071	up	RASAL1
-0.555137	0.446317	-7.35162	6.9276e-12	1.46435e-10	16.5485	9.83436	not-sig	RET
0.84307	3.78204	7.35157	6.92975e-12	1.46435e-10	16.5482	9.83436	up	ERO1A
0.599913	1.69451	7.35094	6.9547e-12	1.46782e-10	16.5447	9.83333	up	LY75
0.58982	2.41779	7.34502	7.19475e-12	1.5155e-10	16.5116	9.81945	up	DTX2
-0.746437	1.28725	-7.34494	7.19821e-12	1.5155e-10	16.5111	9.81945	down	MAP6
-0.606064	1.30019	-7.34324	7.26865e-12	1.52846e-10	16.5016	9.81575	down	LIFR
-0.78032	2.44227	-7.34187	7.326e-12	1.53864e-10	16.4939	9.81286	down	APBB1
-0.568208	2.67	-7.34087	7.36786e-12	1.54554e-10	16.4884	9.81092	not-sig	TSPYL4
-0.272438	0.0939258	-7.33918	7.43969e-12	1.55871e-10	16.4789	9.80723	not-sig	NRSN1
0.965575	2.23932	7.3374	7.51586e-12	1.57276e-10	16.469	9.80334	up	GPR35
0.734239	1.58803	7.33671	7.54581e-12	1.57711e-10	16.4651	9.80214	up	SH3D21
0.401987	3.8139	7.33555	7.59598e-12	1.58567e-10	16.4586	9.79979	not-sig	NUTF2
-0.644874	0.230436	-7.32934	7.87092e-12	1.64108e-10	16.424	9.78487	down	MYT1
-0.398635	2.46391	-7.32743	7.95761e-12	1.65575e-10	16.4133	9.781	not-sig	BLMH
-0.308076	2.25819	-7.3273	7.96335e-12	1.65575e-10	16.4126	9.781	not-sig	VAPB
0.652252	2.6162	7.32715	7.97014e-12	1.65575e-10	16.4117	9.781	up	TNK2
-0.963054	0.863605	-7.32688	7.98283e-12	1.65639e-10	16.4102	9.78084	down	TCEAL5
1.6272	5.42282	7.32633	8.00775e-12	1.65956e-10	16.4071	9.78001	up	PDZK1IP1
0.467318	2.11099	7.32374	8.12763e-12	1.68238e-10	16.3927	9.77408	not-sig	C11orf80
-0.525442	0.298957	-7.3232	8.15269e-12	1.68554e-10	16.3896	9.77326	not-sig	DLGAP3
2.34997	6.46277	7.32102	8.25512e-12	1.70467e-10	16.3775	9.76836	up	CTSE
0.382401	0.790158	7.31932	8.33558e-12	1.71922e-10	16.368	9.76467	not-sig	PPM1J
-0.319202	1.87584	-7.31911	8.34552e-12	1.71922e-10	16.3668	9.76467	not-sig	ANKFY1
0.464037	1.9748	7.31415	8.58609e-12	1.76666e-10	16.3391	9.75285	not-sig	NPAS2
-0.520875	0.191031	-7.31338	8.62361e-12	1.77227e-10	16.3349	9.75147	not-sig	ASTN1
0.534889	5.58732	7.31267	8.65886e-12	1.77739e-10	16.3309	9.75022	not-sig	EIF6
-0.518177	0.774431	-7.30905	8.8399e-12	1.81239e-10	16.3107	9.74175	not-sig	GAS2
-0.26729	1.36027	-7.30757	8.91532e-12	1.82422e-10	16.3024	9.73892	not-sig	ZNF79
-0.387874	4.00477	-7.3075	8.9188e-12	1.82422e-10	16.302	9.73892	not-sig	GABARAP
0.570483	4.12141	7.30718	8.93477e-12	1.82532e-10	16.3003	9.73866	not-sig	CDK2AP2
-1.37484	1.04688	-7.30692	8.94849e-12	1.82596e-10	16.2988	9.73851	down	CALY
-0.465066	0.416323	-7.30536	9.02828e-12	1.84006e-10	16.2901	9.73517	not-sig	RUNDC3B
-0.34912	2.04761	-7.3049	9.05204e-12	1.84272e-10	16.2876	9.73454	not-sig	PRPSAP2
-0.498722	2.40365	-7.30234	9.18579e-12	1.86774e-10	16.2733	9.72868	not-sig	PSIP1
0.479816	3.38283	7.29935	9.34404e-12	1.89768e-10	16.2566	9.72178	not-sig	POLR2H
1.04449	2.43319	7.29689	9.47625e-12	1.92226e-10	16.2429	9.71619	up	ADAP1
0.593348	3.63761	7.29637	9.50417e-12	1.92566e-10	16.24	9.71542	up	SBNO2
0.919399	3.33198	7.29547	9.55339e-12	1.93336e-10	16.235	9.71369	up	KCNK1
-0.251603	1.44638	-7.29258	9.71247e-12	1.96002e-10	16.2189	9.70774	not-sig	POLR3B
-0.597331	3.03799	-7.29252	9.7158e-12	1.96002e-10	16.2186	9.70774	down	B4GAT1
-1.34563	3.62641	-7.29231	9.72722e-12	1.96002e-10	16.2174	9.70774	down	PDK4
-0.440449	2.88145	-7.29225	9.73068e-12	1.96002e-10	16.2171	9.70774	not-sig	TCEAL1
-0.313468	1.86809	-7.29083	9.81025e-12	1.97374e-10	16.2091	9.70471	not-sig	HSF2
-0.28928	1.95167	-7.28991	9.86153e-12	1.98174e-10	16.204	9.70295	not-sig	THAP5
-0.251078	1.27392	-7.2845	1.01709e-11	2.04153e-10	16.1739	9.69004	not-sig	SMYD4
0.649864	5.30692	7.28418	1.01896e-11	2.0429e-10	16.1721	9.68975	up	ARPC1B
-2.43693	3.87847	-7.2796	1.04597e-11	2.09462e-10	16.1466	9.67889	down	CHGA
-0.450943	2.33777	-7.27517	1.0727e-11	2.1449e-10	16.122	9.66859	not-sig	QSOX2
-1.00598	2.83631	-7.27503	1.07357e-11	2.1449e-10	16.1212	9.66859	down	TUSC3
-0.547991	0.234952	-7.27136	1.09627e-11	2.18538e-10	16.1008	9.66047	not-sig	KCNB1
-0.311388	2.43315	-7.27135	1.09637e-11	2.18538e-10	16.1007	9.66047	not-sig	PI4KA
0.340385	3.35393	7.27019	1.10365e-11	2.19734e-10	16.0943	9.6581	not-sig	STX4
-0.582762	0.354737	-7.26641	1.12768e-11	2.24261e-10	16.0733	9.64925	down	SIM1
-0.483187	0.668408	-7.26565	1.13256e-11	2.2497e-10	16.069	9.64788	not-sig	RAB9B
-0.247713	0.735753	-7.2633	1.14787e-11	2.27749e-10	16.0559	9.64254	not-sig	ZNF778
-0.271078	1.75334	-7.26028	1.16778e-11	2.31433e-10	16.0392	9.63557	not-sig	METTL14
-0.495112	0.853034	-7.2585	1.1797e-11	2.33526e-10	16.0293	9.63166	not-sig	TTLL7
-0.382403	0.496436	-7.25723	1.18823e-11	2.34944e-10	16.0223	9.62904	not-sig	KATNAL2
-0.872734	1.52104	-7.25698	1.18994e-11	2.35014e-10	16.0208	9.62891	down	ASB9
0.503918	2.87876	7.25561	1.19927e-11	2.36584e-10	16.0132	9.62601	not-sig	PARP3
-0.774293	0.959829	-7.25178	1.22574e-11	2.41529e-10	15.9919	9.61703	down	GRIK5
0.487561	4.88762	7.25157	1.22718e-11	2.41536e-10	15.9908	9.61702	not-sig	SLC39A1
0.515288	4.96659	7.24263	1.29122e-11	2.53851e-10	15.9412	9.59542	not-sig	CTNNA1
-0.74961	3.40738	-7.24095	1.30366e-11	2.56005e-10	15.9318	9.59175	down	MAGEH1
0.584403	7.19723	7.23624	1.33909e-11	2.62662e-10	15.9057	9.5806	up	MYL12B
0.453806	0.840792	7.23596	1.34122e-11	2.62737e-10	15.9041	9.58048	not-sig	CDC25C
0.392801	2.11256	7.23579	1.34252e-11	2.62737e-10	15.9032	9.58048	not-sig	CCDC120
0.785291	2.14746	7.23443	1.35292e-11	2.64472e-10	15.8957	9.57762	up	IQANK1
-0.302584	0.108903	-7.23319	1.36246e-11	2.66035e-10	15.8888	9.57506	not-sig	SCRT1
-0.79257	1.12122	-7.23189	1.37262e-11	2.67715e-10	15.8816	9.57233	down	RGS9
-0.293243	1.68183	-7.23091	1.38026e-11	2.68901e-10	15.8762	9.57041	not-sig	DSTYK
-0.73153	1.05783	-7.22622	1.41756e-11	2.75856e-10	15.8502	9.55932	down	RTN4RL1
-0.328995	0.142591	-7.22416	1.43424e-11	2.78787e-10	15.8388	9.55473	not-sig	EML6
0.550393	2.98587	7.22276	1.44573e-11	2.80703e-10	15.831	9.55175	not-sig	STXBP2
-0.802175	2.30206	-7.22216	1.45067e-11	2.81345e-10	15.8277	9.55076	down	FXYD6
-0.655185	1.4779	-7.2205	1.46445e-11	2.83698e-10	15.8184	9.54714	down	NAP1L3
-0.284654	1.57606	-7.21794	1.48587e-11	2.87525e-10	15.8043	9.54132	not-sig	MED9
0.881441	4.56711	7.21575	1.5045e-11	2.90803e-10	15.7921	9.5364	up	ITGA6
0.712619	2.76197	7.21441	1.51601e-11	2.92698e-10	15.7847	9.53358	up	RTP4
-0.3904	0.137773	-7.21204	1.53651e-11	2.96324e-10	15.7716	9.52823	not-sig	OTOGL
0.492059	4.68637	7.20944	1.55941e-11	3.00405e-10	15.7572	9.52229	not-sig	ELOVL1
0.691295	3.90879	7.20212	1.62554e-11	3.12793e-10	15.7167	9.50474	up	DVL1
-0.242094	2.14171	-7.20175	1.629e-11	3.1311e-10	15.7146	9.5043	not-sig	INIP
-0.293857	3.35397	-7.20059	1.63971e-11	3.14816e-10	15.7082	9.50194	not-sig	C6orf89
0.968726	2.89742	7.19208	1.72081e-11	3.30019e-10	15.6612	9.48146	up	FERMT1
1.01737	2.32426	7.18918	1.74931e-11	3.35113e-10	15.6451	9.47481	up	SLCO4A1
-1.11843	2.59664	-7.18893	1.75188e-11	3.35232e-10	15.6437	9.47465	down	SLC22A17
-0.550371	0.218289	-7.18785	1.7626e-11	3.36909e-10	15.6378	9.47249	not-sig	RIMS2
0.634556	1.8391	7.18708	1.77027e-11	3.37938e-10	15.6335	9.47116	up	AP1S3
-0.547358	1.13029	-7.18692	1.77191e-11	3.37938e-10	15.6326	9.47116	not-sig	PRRT3
-0.844009	0.335503	-7.18521	1.78919e-11	3.40857e-10	15.6232	9.46743	down	SEZ6
0.578989	1.3402	7.18227	1.81928e-11	3.46206e-10	15.6069	9.46067	not-sig	RTN4R
0.60164	1.44676	7.18022	1.84052e-11	3.49861e-10	15.5956	9.45611	up	HJURP
0.690596	3.02831	7.17972	1.84574e-11	3.50467e-10	15.5928	9.45535	up	TUFT1
-0.799599	2.28259	-7.17894	1.85383e-11	3.51506e-10	15.5886	9.45407	down	MAP1B
-0.510689	1.66306	-7.17881	1.8553e-11	3.51506e-10	15.5878	9.45407	not-sig	GRK3
0.677742	6.02392	7.17537	1.89171e-11	3.58012e-10	15.5688	9.4461	up	ACTN4
-0.20309	1.59225	-7.17195	1.92876e-11	3.64488e-10	15.5499	9.43832	not-sig	RCHY1
-0.68631	0.528383	-7.17182	1.93016e-11	3.64488e-10	15.5492	9.43832	down	RASGRF1
-0.610153	1.08181	-7.17003	1.94983e-11	3.67798e-10	15.5393	9.43439	down	SNCA
-0.563244	1.69442	-7.16912	1.95997e-11	3.68921e-10	15.5343	9.43307	not-sig	SYNGR1
-0.545893	1.12724	-7.16911	1.96007e-11	3.68921e-10	15.5342	9.43307	not-sig	CEP126
-0.333549	1.17094	-7.16724	1.98086e-11	3.72427e-10	15.524	9.42896	not-sig	PRKCE
-1.67476	1.60667	-7.16696	1.98407e-11	3.72624e-10	15.5224	9.42873	down	CRYBA2
1.11028	7.06932	7.16515	2.00451e-11	3.76053e-10	15.5124	9.42475	up	KRT18
-0.336774	2.6197	-7.16314	2.02744e-11	3.79941e-10	15.5013	9.42028	not-sig	KLHDC10
-0.588552	1.47512	-7.16242	2.03564e-11	3.81062e-10	15.4974	9.419	down	USP27X
0.475981	2.68899	7.16014	2.06215e-11	3.8556e-10	15.4847	9.41391	not-sig	CARD19
-0.569015	0.379689	-7.15996	2.06427e-11	3.8556e-10	15.4838	9.41391	not-sig	SYT16
-0.657845	0.961071	-7.15977	2.06638e-11	3.8556e-10	15.4828	9.41391	down	CA8
0.596213	3.6942	7.15779	2.08969e-11	3.89488e-10	15.4718	9.40951	up	SRC
0.819847	4.58202	7.15446	2.12941e-11	3.96462e-10	15.4535	9.4018	up	VMP1
0.429549	4.89932	7.15424	2.13205e-11	3.96524e-10	15.4523	9.40173	not-sig	ARPC2
1.90153	3.6526	7.15374	2.13813e-11	3.97225e-10	15.4495	9.40096	up	AQP5
0.661345	3.47917	7.15034	2.1796e-11	4.04495e-10	15.4308	9.39309	up	TMEM159
-1.07843	1.01003	-7.15011	2.18246e-11	4.0459e-10	15.4295	9.39299	down	CABP7
-0.372109	0.221808	-7.14899	2.19629e-11	4.06715e-10	15.4233	9.39071	not-sig	SAMD3
-0.930486	1.35219	-7.1477	2.21243e-11	4.09263e-10	15.4162	9.388	down	REEP2
1.42092	2.04293	7.14704	2.22068e-11	4.10262e-10	15.4126	9.38694	up	FGFBP1
1.15378	3.03069	7.14689	2.22259e-11	4.10262e-10	15.4117	9.38694	up	SEMA7A
-0.54268	0.389938	-7.14662	2.22591e-11	4.10436e-10	15.4103	9.38675	not-sig	FGF14
-0.54168	0.231727	-7.14387	2.26083e-11	4.16429e-10	15.3951	9.38046	not-sig	GDAP1L1
0.391908	2.4016	7.14097	2.29813e-11	4.22846e-10	15.3791	9.37382	not-sig	FBXL19
-0.409543	0.388165	-7.13683	2.35254e-11	4.32395e-10	15.3563	9.36412	not-sig	RBM11
1.34358	2.4926	7.13613	2.36194e-11	4.33659e-10	15.3524	9.36285	up	TRIM31
-0.358389	1.44165	-7.13271	2.408e-11	4.41646e-10	15.3336	9.35493	not-sig	TXNDC16
-0.3976	1.64571	-7.13219	2.41501e-11	4.4246e-10	15.3308	9.35413	not-sig	MTERF2
-0.392989	0.418426	-7.12941	2.45318e-11	4.48977e-10	15.3155	9.34778	not-sig	MROH8
-0.325233	0.875225	-7.12447	2.52255e-11	4.61182e-10	15.2883	9.33613	not-sig	EPM2A
-0.208614	1.58412	-7.12277	2.54697e-11	4.65153e-10	15.2789	9.3324	not-sig	SCO1
-0.313614	1.34228	-7.12009	2.58573e-11	4.71581e-10	15.2642	9.32644	not-sig	ZNF510
0.620229	1.93318	7.11996	2.58764e-11	4.71581e-10	15.2635	9.32644	up	PLK1
-0.571526	1.09227	-7.11787	2.61834e-11	4.7667e-10	15.252	9.32178	not-sig	TMTC1
0.564677	3.49039	7.11731	2.62654e-11	4.77225e-10	15.2489	9.32128	not-sig	TICAM1
-0.255441	1.89691	-7.11729	2.62693e-11	4.77225e-10	15.2488	9.32128	not-sig	FBXO33
-0.649784	2.97381	-7.11686	2.63322e-11	4.77863e-10	15.2465	9.3207	down	SGCE
0.713244	6.05962	7.11647	2.63906e-11	4.7842e-10	15.2443	9.32019	up	MYL12A
-0.513932	2.77947	-7.11188	2.70824e-11	4.90445e-10	15.2191	9.30941	not-sig	CRY2
-0.408031	1.18763	-7.11092	2.72304e-11	4.92607e-10	15.2138	9.3075	not-sig	GLCCI1
-0.769089	3.40012	-7.10899	2.75277e-11	4.97463e-10	15.2032	9.30324	down	CITED2
0.768679	2.77896	7.10808	2.76691e-11	4.99231e-10	15.1982	9.3017	up	MICALL2
-0.417555	2.55289	-7.10799	2.76835e-11	4.99231e-10	15.1977	9.3017	not-sig	TAF9B
-0.681487	0.856058	-7.10524	2.81155e-11	5.05966e-10	15.1826	9.29588	down	ANK2
0.768609	3.02978	7.10524	2.81157e-11	5.05966e-10	15.1826	9.29588	up	CMTM7
-0.889403	1.18789	-7.10401	2.83118e-11	5.08963e-10	15.1758	9.29331	down	PRUNE2
1.08858	2.37056	7.09845	2.9213e-11	5.24615e-10	15.1453	9.28016	up	GALNT5
-0.289007	2.14953	-7.09264	3.01835e-11	5.4148e-10	15.1134	9.26642	not-sig	CAPN7
0.583327	0.453784	7.09189	3.03112e-11	5.43205e-10	15.1093	9.26504	up	NTF4
0.461166	3.54651	7.0873	3.11048e-11	5.56847e-10	15.0841	9.25426	not-sig	STN1
1.04337	2.85327	7.08677	3.11977e-11	5.5793e-10	15.0812	9.25342	up	HKDC1
0.658191	0.916875	7.08547	3.14266e-11	5.61441e-10	15.0741	9.2507	up	SIM2
0.610389	2.30431	7.08518	3.14776e-11	5.61769e-10	15.0725	9.25044	up	RIPK3
1.19712	1.84974	7.08133	3.21679e-11	5.73495e-10	15.0514	9.24147	up	IGFL2
0.666085	3.17305	7.08056	3.23068e-11	5.75376e-10	15.0472	9.24005	up	CDC42EP2
0.973846	4.13805	7.07768	3.28344e-11	5.84168e-10	15.0314	9.23346	up	FSCN1
0.576856	2.4938	7.07263	3.37814e-11	5.9985e-10	15.0037	9.22196	not-sig	FAM214B
-0.769058	0.53661	-7.0726	3.37855e-11	5.9985e-10	15.0036	9.22196	down	NSG2
-0.673496	0.288417	-7.06955	3.43704e-11	6.09606e-10	14.9869	9.21495	down	PNMA8C
0.680427	2.23484	7.06897	3.44827e-11	6.10751e-10	14.9837	9.21414	up	GRTP1
-0.372867	3.82961	-7.06885	3.45059e-11	6.10751e-10	14.983	9.21414	not-sig	ALDH9A1
-0.36393	2.09441	-7.06852	3.45703e-11	6.11262e-10	14.9812	9.21377	not-sig	KLHL22
-0.373871	1.03179	-7.06824	3.46254e-11	6.11609e-10	14.9797	9.21353	not-sig	ZNF429
-0.339577	1.82125	-7.06621	3.50224e-11	6.17987e-10	14.9685	9.20902	not-sig	FOCAD
0.614969	3.50877	7.0652	3.5222e-11	6.20873e-10	14.963	9.207	up	STK39
-0.468726	0.444946	-7.06446	3.53675e-11	6.22802e-10	14.959	9.20565	not-sig	PGR
-0.731258	2.58151	-7.06297	3.56647e-11	6.27393e-10	14.9508	9.20246	down	NUCB2
-0.372322	2.28671	-7.06202	3.58553e-11	6.29185e-10	14.9456	9.20122	not-sig	PLA2G12A
-0.347368	1.85354	-7.06196	3.58687e-11	6.29185e-10	14.9453	9.20122	not-sig	ZFYVE9
0.761344	4.29343	7.06192	3.58762e-11	6.29185e-10	14.9451	9.20122	up	MFSD10
-2.05872	3.18416	-7.05963	3.63409e-11	6.36687e-10	14.9325	9.19607	down	GC
-0.278879	2.7509	-7.05631	3.70247e-11	6.48008e-10	14.9144	9.18842	not-sig	SPOP
-0.51191	0.250926	-7.05449	3.7406e-11	6.54017e-10	14.9044	9.18441	not-sig	MRLN
0.507208	3.52762	7.05316	3.76851e-11	6.58228e-10	14.8971	9.18162	not-sig	DNM2
0.768668	3.56342	7.05194	3.79441e-11	6.6208e-10	14.8905	9.17909	up	METRNL
-0.999975	2.68484	-7.05173	3.79901e-11	6.62211e-10	14.8893	9.179	down	ENPP2
-0.798911	0.999685	-7.04886	3.8605e-11	6.7225e-10	14.8736	9.17247	down	MBOAT4
0.71275	1.19909	7.04832	3.87229e-11	6.73622e-10	14.8707	9.17158	up	C1QTNF12
-0.181746	1.3906	-7.04799	3.87944e-11	6.74185e-10	14.8689	9.17122	not-sig	RPP14
-0.871851	1.6609	-7.0439	3.96948e-11	6.89136e-10	14.8465	9.16169	down	ABCB1
0.533127	0.843628	7.0425	4.00089e-11	6.93891e-10	14.8388	9.15871	not-sig	CATSPER1
0.972603	3.82321	7.04148	4.0237e-11	6.97145e-10	14.8333	9.15668	up	LDLR
-0.294161	2.70756	-7.04056	4.04457e-11	7.00056e-10	14.8283	9.15487	not-sig	COPS4
0.565148	5.77507	7.03714	4.12295e-11	7.12906e-10	14.8096	9.14697	not-sig	APLP2
-0.365806	0.404907	-7.03696	4.12721e-11	7.12926e-10	14.8086	9.14696	not-sig	ZDHHC15
-0.487707	0.928335	-7.03138	4.25817e-11	7.34812e-10	14.7781	9.13382	not-sig	PGBD5
0.673181	2.36038	7.02916	4.31161e-11	7.43289e-10	14.766	9.12884	up	TNFRSF10A
-0.740409	0.746808	-7.02684	4.36792e-11	7.52243e-10	14.7533	9.12364	down	IQSEC3
0.485605	1.29723	7.02654	4.37523e-11	7.52749e-10	14.7517	9.12335	not-sig	MKRN2OS
-0.556365	0.291339	-7.02489	4.4159e-11	7.58988e-10	14.7427	9.11977	not-sig	SLIT1
0.596283	0.9297	7.02095	4.51464e-11	7.75185e-10	14.7211	9.11059	up	SPOCD1
-0.275746	1.63364	-7.01766	4.59841e-11	7.88784e-10	14.7032	9.10304	not-sig	FBXL4
-0.52905	0.157652	-7.01704	4.61436e-11	7.90732e-10	14.6999	9.10197	not-sig	CACNA1B
-0.252776	1.50658	-7.01615	4.6376e-11	7.93924e-10	14.695	9.10022	not-sig	GID4
-0.567859	0.216744	-7.01558	4.6524e-11	7.95667e-10	14.6919	9.09927	not-sig	NAT16
-0.478923	1.34197	-7.0145	4.68055e-11	7.99687e-10	14.686	9.09708	not-sig	SLC2A13
0.675415	4.44897	7.01395	4.69501e-11	8.01362e-10	14.683	9.09617	up	CD82
0.779849	2.5719	7.00757	4.8655e-11	8.2964e-10	14.6482	9.08111	up	CCDC9B
-0.657485	2.44156	-7.00261	5.00239e-11	8.52139e-10	14.6212	9.06949	down	CCDC3
-0.439448	1.74949	-7.00072	5.05555e-11	8.60342e-10	14.6109	9.06533	not-sig	FAM229B
-0.248988	1.24074	-7.00029	5.0678e-11	8.61575e-10	14.6085	9.06471	not-sig	ZNF180
-0.279868	1.45907	-7.00004	5.07483e-11	8.61921e-10	14.6072	9.06453	not-sig	THTPA
0.868189	3.56832	6.99872	5.11243e-11	8.6745e-10	14.6	9.06176	up	C1orf116
-0.311944	3.52199	-6.99699	5.16229e-11	8.75049e-10	14.5906	9.05797	not-sig	PITPNA
-0.32328	0.135793	-6.99431	5.2402e-11	8.86629e-10	14.576	9.05226	not-sig	LINGO4
1.33848	3.39949	6.99428	5.24091e-11	8.86629e-10	14.5758	9.05226	up	PTGES
-0.962351	1.57248	-6.99212	5.30461e-11	8.96527e-10	14.5641	9.04744	down	KCNH2
1.97767	2.77036	6.99013	5.36402e-11	9.05678e-10	14.5532	9.04303	up	MUC5AC
0.706494	2.5732	6.98978	5.37456e-11	9.06568e-10	14.5513	9.0426	up	MBOAT2
-0.433652	2.64703	-6.98847	5.41378e-11	9.12292e-10	14.5442	9.03987	not-sig	ATRN
0.292271	2.30187	6.98814	5.42391e-11	9.13104e-10	14.5424	9.03948	not-sig	ZFYVE21
0.463068	3.74982	6.98724	5.45135e-11	9.16827e-10	14.5375	9.03771	not-sig	ATIC
0.573036	2.68632	6.98183	5.61858e-11	9.44031e-10	14.5081	9.02501	not-sig	TGIF1
0.934575	3.1703	6.97999	5.67658e-11	9.52847e-10	14.498	9.02098	up	PLPP2
-0.568879	0.453526	-6.97848	5.72453e-11	9.5996e-10	14.4899	9.01775	not-sig	JAKMIP1
0.539354	1.42742	6.97664	5.7838e-11	9.68956e-10	14.4798	9.0137	not-sig	SPC24
0.377258	3.10338	6.97321	5.89556e-11	9.86719e-10	14.4612	9.00581	not-sig	KCTD5
-0.212792	0.0589085	-6.97196	5.93684e-11	9.92418e-10	14.4544	9.00331	not-sig	GLRA3
1.04104	3.17221	6.97183	5.94114e-11	9.92418e-10	14.4537	9.00331	up	UBE2C
-0.80621	0.867079	-6.96806	6.06728e-11	1.01251e-09	14.4332	8.9946	down	NECAB2
-0.446144	1.00252	-6.96263	6.25375e-11	1.04262e-09	14.4037	8.98188	not-sig	PDE8B
0.806599	2.82879	6.95827	6.40758e-11	1.06718e-09	14.3801	8.97176	up	PTPRU
0.686405	2.9781	6.95811	6.41347e-11	1.06718e-09	14.3792	8.97176	up	MAFF
-1.34204	1.79159	-6.95711	6.44913e-11	1.07207e-09	14.3738	8.96978	down	VGF
-0.636407	0.977398	-6.95532	6.514e-11	1.08181e-09	14.364	8.96585	down	DYNC1I1
0.302561	3.96377	6.95475	6.53475e-11	1.08421e-09	14.3609	8.96488	not-sig	ZDHHC5
-0.376345	0.210374	-6.95163	6.64909e-11	1.10123e-09	14.344	8.95812	not-sig	GLIPR1L2
-0.349517	0.958627	-6.95161	6.6501e-11	1.10123e-09	14.3439	8.95812	not-sig	ZNF594
1.87399	5.21377	6.95072	6.68314e-11	1.10564e-09	14.3391	8.95639	up	MMP11
-0.505459	1.75496	-6.94857	6.76366e-11	1.11789e-09	14.3274	8.9516	not-sig	NAPB
0.824627	2.54821	6.94688	6.82733e-11	1.12733e-09	14.3183	8.94795	up	SLC22A18
0.514426	1.68743	6.94197	7.01692e-11	1.15752e-09	14.2916	8.93647	not-sig	PARD6B
0.657719	0.681716	6.94122	7.04593e-11	1.1612e-09	14.2876	8.93509	up	ANXA8L1
0.86158	2.87882	6.93924	7.12422e-11	1.17298e-09	14.2768	8.93071	up	CORO2A
-0.543155	0.410758	-6.93618	7.24666e-11	1.192e-09	14.2602	8.92373	not-sig	TMEM236
-0.534047	1.10012	-6.93442	7.31798e-11	1.20258e-09	14.2507	8.91989	not-sig	NME5
-0.275681	1.50035	-6.93391	7.33856e-11	1.20481e-09	14.2479	8.91908	not-sig	WDR35
-0.54692	2.39248	-6.93196	7.41863e-11	1.2168e-09	14.2374	8.91478	not-sig	PBX3
0.57317	3.40444	6.93168	7.43044e-11	1.21757e-09	14.2358	8.9145	not-sig	BOK
0.773004	2.88954	6.93033	7.48629e-11	1.22556e-09	14.2285	8.91167	up	ARHGEF16
0.907803	3.2839	6.92804	7.58233e-11	1.2401e-09	14.2161	8.90654	up	CARD11
0.454215	0.644313	6.92769	7.59702e-11	1.24133e-09	14.2142	8.90611	not-sig	PPP1R3G
-0.503543	2.8972	-6.9265	7.64759e-11	1.24841e-09	14.2078	8.90364	not-sig	NDST1
-0.417454	3.10594	-6.92489	7.71636e-11	1.25844e-09	14.1991	8.90017	not-sig	GYG1
-0.515858	0.365606	-6.92285	7.8042e-11	1.27156e-09	14.188	8.89566	not-sig	GPM6A
0.854779	3.1089	6.92071	7.89754e-11	1.28527e-09	14.1765	8.89101	up	RHPN2
1.02358	3.69563	6.92058	7.90325e-11	1.28527e-09	14.1758	8.89101	up	CAPN5
0.317997	2.54259	6.91287	8.24912e-11	1.33913e-09	14.134	8.87318	not-sig	CNIH4
0.77797	6.47502	6.91285	8.24999e-11	1.33913e-09	14.1339	8.87318	up	SH3BGRL3
1.31979	1.53849	6.91177	8.29981e-11	1.34595e-09	14.1281	8.87097	up	KLK8
-0.430807	1.23963	-6.91015	8.37488e-11	1.35684e-09	14.1193	8.86747	not-sig	NXPE3
-0.396115	0.210857	-6.90926	8.41627e-11	1.36226e-09	14.1145	8.86574	not-sig	GPR158
1.03901	1.49674	6.9086	8.4472e-11	1.36599e-09	14.1109	8.86455	up	WNT7A
0.594317	4.02798	6.9084	8.45659e-11	1.36622e-09	14.1099	8.86448	up	ADAM15
0.727745	1.17	6.90794	8.47807e-11	1.36712e-09	14.1074	8.86419	up	ATP6V1FNB
-0.289884	2.10563	-6.90794	8.47811e-11	1.36712e-09	14.1074	8.86419	not-sig	SEC22C
-0.801571	2.21561	-6.90777	8.48595e-11	1.36712e-09	14.1065	8.86419	down	CD200
-0.642672	0.790529	-6.90205	8.75972e-11	1.40991e-09	14.0756	8.85081	down	PEG3
0.255056	2.43932	6.90115	8.80398e-11	1.41303e-09	14.0707	8.84985	not-sig	USB1
-0.789263	1.57999	-6.90106	8.80838e-11	1.41303e-09	14.0702	8.84985	down	CDO1
-0.409114	3.0994	-6.90104	8.8091e-11	1.41303e-09	14.0701	8.84985	not-sig	ST6GALNAC6
-0.435459	0.358577	-6.90098	8.81195e-11	1.41303e-09	14.0698	8.84985	not-sig	FOXP2
0.544268	7.15718	6.89722	8.99772e-11	1.4406e-09	14.0495	8.84146	not-sig	PRDX5
-0.395167	1.7909	-6.89695	9.01129e-11	1.4406e-09	14.048	8.84146	not-sig	CHD6
-0.588285	0.800498	-6.89687	9.01521e-11	1.4406e-09	14.0476	8.84146	down	ART4
-0.322944	1.93431	-6.89672	9.02289e-11	1.4406e-09	14.0467	8.84146	not-sig	ZADH2
-0.371764	3.03754	-6.89666	9.02572e-11	1.4406e-09	14.0464	8.84146	not-sig	TTC3
0.474065	1.25645	6.89387	9.16658e-11	1.46173e-09	14.0314	8.83513	not-sig	RAD51
0.458224	1.24453	6.88953	9.39008e-11	1.49491e-09	14.0079	8.82539	not-sig	UHRF1
-0.761992	1.46193	-6.88949	9.392e-11	1.49491e-09	14.0077	8.82539	down	FAM167A
0.364502	4.49663	6.88893	9.42137e-11	1.4982e-09	14.0047	8.82443	not-sig	CTDSP1
-0.741254	1.37258	-6.88712	9.51625e-11	1.51189e-09	13.9949	8.82048	down	PDZD4
0.612971	1.94453	6.88394	9.68541e-11	1.53735e-09	13.9778	8.81323	up	INPP4B
-0.567463	1.24931	-6.8837	9.69836e-11	1.53798e-09	13.9765	8.81305	not-sig	SNPH
-0.330661	1.53892	-6.8835	9.70909e-11	1.53827e-09	13.9754	8.81297	not-sig	ZNF14
0.423985	3.14559	6.88109	9.83932e-11	1.55747e-09	13.9624	8.80758	not-sig	PATL1
-0.265979	1.12639	-6.87982	9.90928e-11	1.5671e-09	13.9555	8.8049	not-sig	ZNF607
-0.535371	0.312941	-6.87898	9.95522e-11	1.57293e-09	13.951	8.80329	not-sig	LRRTM3
-0.253014	1.48516	-6.87783	1.00188e-10	1.58152e-09	13.9448	8.80092	not-sig	PRMT9
0.689412	2.71201	6.87449	1.02059e-10	1.60959e-09	13.9268	8.79329	up	SLC25A37
-0.337779	1.7517	-6.874	1.02336e-10	1.61247e-09	13.9242	8.79251	not-sig	ZBTB40
-0.273008	0.943855	-6.87298	1.02918e-10	1.62016e-09	13.9186	8.79044	not-sig	CPEB3
1.06325	2.5007	6.86932	1.05024e-10	1.65181e-09	13.8989	8.78204	up	MELTF
0.484688	1.46754	6.8665	1.06672e-10	1.67619e-09	13.8838	8.77568	not-sig	TONSL
0.522347	5.93342	6.86349	1.08469e-10	1.70288e-09	13.8675	8.76882	not-sig	NOP10
0.680208	1.92044	6.85981	1.10694e-10	1.73614e-09	13.8477	8.76041	up	CEP55
0.240938	2.25928	6.85966	1.1079e-10	1.73614e-09	13.8469	8.76041	not-sig	STAMBP
-0.371789	1.13321	-6.85511	1.13613e-10	1.77877e-09	13.8224	8.74988	not-sig	GPR155
-0.419144	1.86704	-6.85465	1.13901e-10	1.78165e-09	13.8199	8.74918	not-sig	TSHZ1
-0.731861	0.607271	-6.85269	1.15145e-10	1.79948e-09	13.8094	8.74485	down	ADGRG2
-0.277786	2.17258	-6.852	1.15585e-10	1.80472e-09	13.8056	8.74359	not-sig	DPH5
-0.642384	1.00603	-6.8485	1.17842e-10	1.83829e-09	13.7868	8.73559	down	ATP1B2
0.552663	1.4639	6.84802	1.18152e-10	1.84145e-09	13.7843	8.73484	not-sig	NAGS
-0.204685	1.67188	-6.84533	1.19921e-10	1.86734e-09	13.7698	8.72878	not-sig	HELQ
-0.612919	2.16792	-6.84511	1.2007e-10	1.86774e-09	13.7686	8.72868	down	CYYR1
-0.510463	0.315828	-6.84497	1.20164e-10	1.86774e-09	13.7678	8.72868	not-sig	NEFM
-0.242678	1.77534	-6.8352	1.2682e-10	1.96942e-09	13.7153	8.70566	not-sig	MSANTD4
0.658716	5.65784	6.83336	1.28117e-10	1.98778e-09	13.7054	8.70163	up	LMNA
0.82273	4.77504	6.83052	1.3014e-10	2.01575e-09	13.6902	8.69556	up	DHRS3
-0.26269	1.21098	-6.8305	1.30154e-10	2.01575e-09	13.6901	8.69556	not-sig	SPATA7
-0.730925	2.02108	-6.82929	1.31026e-10	2.02743e-09	13.6836	8.69305	down	GIMAP6
0.923573	4.22093	6.82463	1.3444e-10	2.0784e-09	13.6585	8.68227	up	TCIRG1
0.700523	2.22612	6.81871	1.38903e-10	2.14547e-09	13.6268	8.66848	up	TTC9
0.439634	2.73688	6.81742	1.39895e-10	2.15884e-09	13.6198	8.66578	not-sig	NRM
-0.231655	0.993902	-6.81707	1.40159e-10	2.16098e-09	13.618	8.66535	not-sig	ACTR3B
-0.447797	0.596692	-6.81687	1.4032e-10	2.16109e-09	13.6169	8.66533	not-sig	ICA1L
0.719414	4.24891	6.81674	1.40417e-10	2.16109e-09	13.6162	8.66533	up	HES1
-0.462008	2.59578	-6.81474	1.41973e-10	2.18309e-09	13.6055	8.66093	not-sig	ATP6V0A1
-0.332505	2.33752	-6.81433	1.42297e-10	2.18612e-09	13.6033	8.66033	not-sig	SOS2
-0.620213	0.28114	-6.81338	1.43046e-10	2.19566e-09	13.5982	8.65843	down	SERTM1
1.0199	4.08555	6.8125	1.43734e-10	2.20426e-09	13.5935	8.65674	up	SMIM22
-0.453162	2.40224	-6.80793	1.47404e-10	2.25853e-09	13.569	8.64617	not-sig	ARL15
0.697702	1.69792	6.8076	1.47671e-10	2.26061e-09	13.5672	8.64577	up	STYK1
-0.405968	0.423491	-6.80645	1.48607e-10	2.27293e-09	13.561	8.64341	not-sig	SRSF12
-0.743431	0.384245	-6.80566	1.49256e-10	2.28082e-09	13.5568	8.64191	down	FSTL4
2.35811	3.59778	6.80515	1.49673e-10	2.28517e-09	13.5541	8.64108	up	MUCL3
2.11166	2.54394	6.80435	1.50342e-10	2.29334e-09	13.5497	8.63953	up	KRT6A
0.680747	2.70671	6.80098	1.53151e-10	2.33412e-09	13.5317	8.63188	up	SMAGP
0.333729	4.75785	6.79944	1.54455e-10	2.35192e-09	13.5235	8.62858	not-sig	SUMO1
-0.434372	0.383986	-6.79669	1.56817e-10	2.38578e-09	13.5087	8.62237	not-sig	PPP2R2B
-0.266921	0.898764	-6.79596	1.57444e-10	2.3932e-09	13.5048	8.62102	not-sig	ERCC4
-0.22736	1.90628	-6.78779	1.64685e-10	2.50107e-09	13.4611	8.60187	not-sig	MECP2
-1.00968	1.91976	-6.78599	1.66317e-10	2.52362e-09	13.4515	8.59798	down	PEG10
1.23553	1.84085	6.78574	1.66549e-10	2.52491e-09	13.4501	8.59775	up	GJB5
-0.29902	1.21755	-6.78398	1.6817e-10	2.54724e-09	13.4407	8.59393	not-sig	KIAA1586
0.90833	3.69586	6.78379	1.68342e-10	2.54762e-09	13.4397	8.59387	up	CGN
-0.681743	1.07254	-6.78245	1.69587e-10	2.5642e-09	13.4325	8.59105	down	NTRK2
-0.342573	0.942109	-6.7813	1.70669e-10	2.5783e-09	13.4263	8.58867	not-sig	RFX3
-0.229098	0.889682	-6.77551	1.76185e-10	2.6593e-09	13.3954	8.57523	not-sig	TTLL11
-0.567632	0.494287	-6.77246	1.79163e-10	2.70188e-09	13.3791	8.56833	not-sig	LRRC4
-0.297377	0.109219	-6.77155	1.80057e-10	2.71299e-09	13.3742	8.56655	not-sig	TCERG1L
0.692669	1.41412	6.77064	1.80954e-10	2.72412e-09	13.3694	8.56477	up	TBX6
-0.321014	2.65298	-6.76953	1.82068e-10	2.7385e-09	13.3634	8.56249	not-sig	ZCCHC3
0.343304	4.16156	6.76894	1.82654e-10	2.74492e-09	13.3603	8.56147	not-sig	TMEM179B
0.614969	1.61063	6.76656	1.85054e-10	2.77653e-09	13.3476	8.5565	up	SAPCD2
-0.671057	1.58603	-6.76654	1.85081e-10	2.77653e-09	13.3474	8.5565	down	C14orf132
-0.264015	1.84087	-6.76138	1.90398e-10	2.85382e-09	13.3199	8.54457	not-sig	TAPT1
-0.713149	1.49365	-6.76026	1.91573e-10	2.86892e-09	13.3139	8.54228	down	FAM107A
0.583281	2.88766	6.75909	1.92805e-10	2.88487e-09	13.3077	8.53987	up	TCF7L2
-0.373957	0.688386	-6.7576	1.94382e-10	2.90594e-09	13.2997	8.53671	not-sig	APBA1
-0.532961	0.813646	-6.75579	1.9633e-10	2.93051e-09	13.29	8.53306	not-sig	ELOVL4
-0.265774	2.14414	-6.75575	1.96366e-10	2.93051e-09	13.2899	8.53306	not-sig	ELP2
-1.12776	1.27001	-6.75527	1.96884e-10	2.93571e-09	13.2873	8.53229	down	SHISAL2B
-0.365849	0.901833	-6.75472	1.97477e-10	2.942e-09	13.2844	8.53136	not-sig	SLC46A1
-0.340995	0.14301	-6.75234	2.00071e-10	2.97807e-09	13.2717	8.52606	not-sig	SNTG2
-0.547866	0.279913	-6.75098	2.01571e-10	2.99781e-09	13.2644	8.5232	not-sig	RIIAD1
0.648231	2.97243	6.74885	2.03944e-10	3.03047e-09	13.253	8.51849	up	SHB
0.824835	2.93117	6.7467	2.06359e-10	3.06373e-09	13.2416	8.51375	up	STEAP3
-0.248306	0.971052	-6.74566	2.0754e-10	3.07861e-09	13.236	8.51165	not-sig	DNAJC27
-0.426496	1.3816	-6.74475	2.08578e-10	3.09134e-09	13.2312	8.50985	not-sig	CLCN4
-0.585485	1.43361	-6.74	2.14078e-10	3.16852e-09	13.2058	8.49914	down	DIPK1B
-0.29281	1.40052	-6.73993	2.14154e-10	3.16852e-09	13.2055	8.49914	not-sig	NKIRAS1
-0.492394	2.3552	-6.73746	2.17073e-10	3.20652e-09	13.1923	8.49397	not-sig	ACAT1
-0.670615	2.95691	-6.73744	2.17095e-10	3.20652e-09	13.1922	8.49397	down	NRSN2
0.590925	2.04236	6.73719	2.17395e-10	3.20672e-09	13.1909	8.49394	up	CDK1
-0.63001	1.76603	-6.73712	2.1748e-10	3.20672e-09	13.1905	8.49394	down	CYFIP2
0.35409	3.81187	6.73578	2.19079e-10	3.22753e-09	13.1834	8.49113	not-sig	RALY
0.741071	1.55356	6.7346	2.20501e-10	3.2457e-09	13.1771	8.48869	up	MSX2
-0.433584	0.204827	-6.73139	2.24417e-10	3.30052e-09	13.1599	8.48142	not-sig	KLB
0.561492	5.76939	6.73011	2.25988e-10	3.32078e-09	13.1532	8.47876	not-sig	YWHAZ
0.588082	3.0759	6.72965	2.26561e-10	3.32637e-09	13.1507	8.47803	up	CPTP
-0.473384	4.24609	-6.72895	2.27428e-10	3.33626e-09	13.147	8.47674	not-sig	PRKAR1A
-0.27063	2.24591	-6.72778	2.28888e-10	3.35482e-09	13.1408	8.47433	not-sig	SACM1L
-0.602998	2.53456	-6.72508	2.32291e-10	3.39907e-09	13.1264	8.46864	down	TBC1D9
0.687822	3.38075	6.72508	2.32302e-10	3.39907e-09	13.1264	8.46864	up	CDR2L
-0.236201	1.49132	-6.72293	2.35043e-10	3.43625e-09	13.1149	8.46392	not-sig	SLC25A51
-0.62202	0.380832	-6.72267	2.35378e-10	3.43824e-09	13.1136	8.46366	down	MAPT
0.912183	3.09305	6.72216	2.36031e-10	3.44221e-09	13.1109	8.46316	up	SEMA3B
-0.309828	2.24256	-6.72215	2.3605e-10	3.44221e-09	13.1108	8.46316	not-sig	POLR3H
0.856929	2.74603	6.72032	2.38418e-10	3.4738e-09	13.1011	8.4592	up	HOXB7
-0.339739	1.58227	-6.71951	2.3948e-10	3.48632e-09	13.0967	8.45763	not-sig	JMY
0.683401	3.09291	6.71835	2.41003e-10	3.50553e-09	13.0906	8.45525	up	CD58
-0.596449	0.566071	-6.71716	2.4258e-10	3.5255e-09	13.0842	8.45278	down	KCNIP1
2.14576	7.41331	6.71538	2.44958e-10	3.55705e-09	13.0747	8.44891	up	LCN2
0.705193	3.94548	6.70964	2.52757e-10	3.66721e-09	13.0443	8.43566	up	ADGRE5
-0.263998	1.97268	-6.7092	2.53369e-10	3.673e-09	13.0419	8.43498	not-sig	GEMIN4
-0.38762	2.65534	-6.70902	2.53622e-10	3.67358e-09	13.0409	8.43491	not-sig	TTC37
-0.626923	1.74021	-6.70861	2.54188e-10	3.67867e-09	13.0388	8.43431	down	GIMAP8
1.05052	2.77023	6.70828	2.54639e-10	3.68212e-09	13.037	8.4339	up	RAPGEFL1
-0.357694	2.75492	-6.70809	2.54907e-10	3.68289e-09	13.036	8.43381	not-sig	TBC1D13
-0.356482	0.326331	-6.70606	2.57751e-10	3.7184e-09	13.0252	8.42964	not-sig	ZNF781
1.3344	4.93342	6.70603	2.57796e-10	3.7184e-09	13.0251	8.42964	up	PLAU
0.777433	5.08731	6.70452	2.59926e-10	3.74598e-09	13.017	8.42643	up	TNFRSF21
0.71019	0.932863	6.70432	2.60217e-10	3.74703e-09	13.016	8.42631	up	TBX15
-0.318014	2.82186	-6.70273	2.62476e-10	3.77641e-09	13.0076	8.42292	not-sig	DCTN4
1.11733	2.30169	6.70197	2.63577e-10	3.78908e-09	13.0035	8.42147	up	COL7A1
0.962849	3.27952	6.70165	2.64033e-10	3.79247e-09	13.0018	8.42108	up	HIST1H2BD
0.713042	3.50871	6.69878	2.68211e-10	3.84928e-09	12.9865	8.41462	up	GPC1
0.818291	1.93125	6.69563	2.7285e-10	3.9126e-09	12.9698	8.40753	up	WNT7B
-0.223725	1.17545	-6.69412	2.7512e-10	3.94023e-09	12.9618	8.40448	not-sig	WDFY2
0.484124	1.75099	6.69404	2.75235e-10	3.94023e-09	12.9614	8.40448	not-sig	POC1A
-0.392114	4.08248	-6.69295	2.76877e-10	3.96045e-09	12.9556	8.40226	not-sig	ATP5F1A
0.484573	2.18545	6.69245	2.77629e-10	3.9679e-09	12.953	8.40144	not-sig	ARHGAP32
-0.301678	1.77158	-6.69115	2.79617e-10	3.993e-09	12.946	8.3987	not-sig	TATDN3
1.42696	2.34125	6.6903	2.8091e-10	4.00815e-09	12.9415	8.39706	up	DKK1
0.639201	3.65552	6.6886	2.83527e-10	4.04213e-09	12.9325	8.39339	up	TP53I3
-0.374076	2.90459	-6.68728	2.85577e-10	4.068e-09	12.9255	8.39062	not-sig	NUDT9
0.675472	4.47782	6.68602	2.87544e-10	4.09263e-09	12.9188	8.388	up	EHD2
0.482916	2.04907	6.6851	2.88993e-10	4.10985e-09	12.9139	8.38617	not-sig	CACNB3
1.33602	3.04988	6.68478	2.89502e-10	4.1137e-09	12.9122	8.38577	up	KLK11
-0.576492	0.329491	-6.67798	3.00434e-10	4.26552e-09	12.8762	8.37003	not-sig	CERS1
-0.300734	2.31515	-6.67706	3.01944e-10	4.28243e-09	12.8713	8.36831	not-sig	RAD17
0.494115	0.667186	6.67695	3.02122e-10	4.28243e-09	12.8707	8.36831	not-sig	AC068580.4
-0.294558	3.03288	-6.6731	3.08525e-10	4.36959e-09	12.8503	8.35956	not-sig	RPA1
-0.366562	0.114683	-6.67192	3.10516e-10	4.39417e-09	12.8441	8.35712	not-sig	PRR18
0.281756	1.8785	6.67144	3.11321e-10	4.40195e-09	12.8416	8.35636	not-sig	TMEM41A
0.601325	1.38062	6.67096	3.12135e-10	4.40984e-09	12.839	8.35558	up	SLC22A18AS
-0.525011	3.25326	-6.67015	3.1352e-10	4.42577e-09	12.8347	8.35401	not-sig	DNAJB9
0.421325	0.556457	6.66902	3.15451e-10	4.44939e-09	12.8287	8.3517	not-sig	C10orf55
-0.230926	1.33119	-6.66805	3.17123e-10	4.4693e-09	12.8236	8.34976	not-sig	VPS53
0.456288	1.16123	6.66702	3.18917e-10	4.49091e-09	12.8181	8.34767	not-sig	SKA3
0.457623	0.868047	6.66594	3.208e-10	4.51373e-09	12.8124	8.34546	not-sig	S100A5
-0.644499	1.81902	-6.66508	3.22303e-10	4.53118e-09	12.8078	8.34379	down	CERS4
0.388827	3.54187	6.66444	3.23417e-10	4.5424e-09	12.8045	8.34271	not-sig	ADSS
-0.743606	0.749808	-6.66432	3.23628e-10	4.5424e-09	12.8039	8.34271	down	SLC35F3
-0.194553	1.40785	-6.66341	3.2524e-10	4.5613e-09	12.799	8.34091	not-sig	CDADC1
0.571332	0.771469	6.65758	3.35732e-10	4.70462e-09	12.7681	8.32748	not-sig	CREG2
-0.335781	0.18687	-6.65608	3.38485e-10	4.73934e-09	12.7602	8.32428	not-sig	CLUL1
-0.30557	1.06273	-6.65478	3.40879e-10	4.76604e-09	12.7533	8.32184	not-sig	SLC30A4
0.817462	1.45748	6.65475	3.40946e-10	4.76604e-09	12.7532	8.32184	up	ADGRF1
-0.771348	1.80335	-6.65138	3.4725e-10	4.85024e-09	12.7353	8.31424	down	ARFGEF3
0.308585	2.40483	6.65011	3.49648e-10	4.87977e-09	12.7286	8.3116	not-sig	FADD
-0.325063	2.75204	-6.64888	3.51999e-10	4.9086e-09	12.7221	8.30904	not-sig	CAMTA2
0.835184	1.9399	6.64787	3.53943e-10	4.93172e-09	12.7168	8.307	up	SLC4A11
-0.745721	0.936541	-6.64588	3.57778e-10	4.98112e-09	12.7063	8.30267	down	CTNND2
-1.04086	0.650754	-6.64514	3.59228e-10	4.99728e-09	12.7024	8.30127	down	SYT5
-0.32544	1.43859	-6.64251	3.64389e-10	5.06498e-09	12.6885	8.29542	not-sig	AHI1
0.378513	3.11132	6.64151	3.66389e-10	5.08867e-09	12.6832	8.2934	not-sig	MED15
-0.412838	0.581723	-6.64055	3.68294e-10	5.11101e-09	12.6781	8.29149	not-sig	ATP6V1G2
-0.532973	0.74881	-6.63947	3.70455e-10	5.13686e-09	12.6724	8.2893	not-sig	GALNT16
-0.308077	0.0852867	-6.6391	3.71217e-10	5.14328e-09	12.6704	8.28876	not-sig	CNTN5
0.594353	3.55846	6.63855	3.72317e-10	5.1516e-09	12.6676	8.28806	up	TTLL12
-0.330827	1.78172	-6.6385	3.72416e-10	5.1516e-09	12.6673	8.28806	not-sig	ARHGEF9
-0.310544	1.58034	-6.6381	3.73227e-10	5.15868e-09	12.6652	8.28746	not-sig	ST3GAL3
-0.343473	1.43601	-6.63538	3.78796e-10	5.23145e-09	12.6508	8.28138	not-sig	NRIP2
-0.585351	0.529179	-6.63411	3.81416e-10	5.26342e-09	12.6441	8.27873	down	CBLN4
-0.635431	1.7282	-6.6326	3.84558e-10	5.30252e-09	12.6361	8.27552	down	EDNRB
-0.454633	2.77686	-6.62755	3.95239e-10	5.44545e-09	12.6095	8.26397	not-sig	ZNF189
0.380472	3.64691	6.62304	4.05028e-10	5.57585e-09	12.5857	8.25369	not-sig	TNIP2
0.692488	2.11622	6.61958	4.12704e-10	5.67688e-09	12.5674	8.24589	up	MACC1
-0.248316	1.0945	-6.61943	4.13026e-10	5.67688e-09	12.5667	8.24589	not-sig	KDM8
0.23028	2.46912	6.619	4.14005e-10	5.6858e-09	12.5644	8.24521	not-sig	TTC9C
0.365928	3.71675	6.61475	4.23653e-10	5.81367e-09	12.542	8.23555	not-sig	SLC10A3
0.540831	1.76605	6.61365	4.26195e-10	5.8439e-09	12.5361	8.2333	not-sig	CDCA5
-0.447378	0.238655	-6.613	4.27692e-10	5.85976e-09	12.5327	8.23212	not-sig	TMEM72
-0.316881	2.80465	-6.61281	4.28124e-10	5.86101e-09	12.5318	8.23203	not-sig	RNF146
-0.364631	1.551	-6.61168	4.30766e-10	5.88987e-09	12.5258	8.22989	not-sig	FOXRED2
-0.830178	0.549153	-6.61161	4.30916e-10	5.88987e-09	12.5254	8.22989	down	PAPPA2
0.398282	3.45837	6.60685	4.42178e-10	6.03901e-09	12.5004	8.21903	not-sig	FRMD8
-0.404862	0.175122	-6.60396	4.49158e-10	6.12948e-09	12.4851	8.21258	not-sig	P2RX6
-0.408215	0.113009	-6.59823	4.63324e-10	6.31779e-09	12.4549	8.19943	not-sig	DSCAM
0.859164	4.08263	6.59793	4.64075e-10	6.32303e-09	12.4534	8.19907	up	MYOF
1.78794	2.08403	6.59627	4.68243e-10	6.37477e-09	12.4447	8.19554	up	SPRR1A
0.456608	5.44578	6.59572	4.69662e-10	6.38904e-09	12.4417	8.19456	not-sig	GNG5
-0.506623	1.37388	-6.59341	4.75555e-10	6.46409e-09	12.4296	8.18949	not-sig	CD302
0.356972	0.903496	6.59056	4.82941e-10	6.55931e-09	12.4146	8.18314	not-sig	FANCA
0.497231	1.77016	6.58954	4.85617e-10	6.59047e-09	12.4093	8.18108	not-sig	RMI2
-0.421897	2.36919	-6.58927	4.86341e-10	6.5951e-09	12.4078	8.18078	not-sig	KLHL9
-0.300625	1.97456	-6.58778	4.90267e-10	6.6431e-09	12.4	8.17763	not-sig	TRIM37
0.713472	4.84156	6.5873	4.91546e-10	6.65519e-09	12.3975	8.17684	up	ITGB5
-0.433809	0.819618	-6.58622	4.94412e-10	6.68873e-09	12.3918	8.17466	not-sig	TMCC2
0.544722	3.85201	6.58503	4.97612e-10	6.72674e-09	12.3855	8.1722	not-sig	TES
-0.548802	0.518824	-6.58363	5.01381e-10	6.77005e-09	12.3782	8.16941	not-sig	CCDC188
-0.420604	1.82161	-6.58355	5.01601e-10	6.77005e-09	12.3778	8.16941	not-sig	ALDH5A1
-0.535545	0.209913	-6.58211	5.05541e-10	6.81788e-09	12.3702	8.16635	not-sig	PTPRT
-0.565663	2.01886	-6.58018	5.10841e-10	6.88247e-09	12.36	8.16226	not-sig	KDR
-0.315153	1.81165	-6.58007	5.1113e-10	6.88247e-09	12.3595	8.16226	not-sig	TMEM268
-0.367923	1.00524	-6.57894	5.14273e-10	6.91666e-09	12.3535	8.1601	not-sig	EID3
-0.367756	0.234511	-6.57887	5.14472e-10	6.91666e-09	12.3531	8.1601	not-sig	FAM218A
-0.264091	1.66765	-6.57774	5.17602e-10	6.95331e-09	12.3472	8.15781	not-sig	ZNF689
-0.757371	1.92034	-6.57631	5.21626e-10	7.0019e-09	12.3397	8.15478	down	CRMP1
0.378345	5.27829	6.57534	5.24372e-10	7.03328e-09	12.3346	8.15284	not-sig	APH1A
-0.640977	0.369067	-6.57505	5.25194e-10	7.03882e-09	12.3331	8.1525	down	SNCB
-0.328351	2.38159	-6.57426	5.27432e-10	7.06333e-09	12.329	8.15099	not-sig	NCOA1
-0.207817	1.14998	-6.57381	5.28728e-10	7.07517e-09	12.3266	8.15026	not-sig	BCDIN3D
-0.295063	0.317776	-6.57259	5.32217e-10	7.11634e-09	12.3202	8.14774	not-sig	ZCWPW2
0.765213	1.17428	6.56821	5.44969e-10	7.28119e-09	12.2972	8.1378	up	PDE4C
0.493805	3.52401	6.56609	5.51214e-10	7.35441e-09	12.2861	8.13345	not-sig	SQOR
-0.642612	1.93604	-6.56605	5.51348e-10	7.35441e-09	12.2859	8.13345	down	EPHX2
0.501105	3.3581	6.56588	5.51857e-10	7.35441e-09	12.285	8.13345	not-sig	BCAR1
-3.1041	5.27694	-6.56565	5.52527e-10	7.35441e-09	12.2838	8.13345	down	TTR
-0.774797	0.496742	-6.56563	5.52584e-10	7.35441e-09	12.2837	8.13345	down	TMEM145
-0.524291	1.55805	-6.56367	5.58474e-10	7.42637e-09	12.2734	8.12922	not-sig	MAN1C1
-0.420458	3.23128	-6.56354	5.58853e-10	7.42637e-09	12.2727	8.12922	not-sig	MOAP1
-0.483756	1.46527	-6.56168	5.64493e-10	7.49428e-09	12.263	8.12527	not-sig	ITPR1
0.381472	2.33664	6.56145	5.65217e-10	7.49428e-09	12.2617	8.12527	not-sig	TMEM134
-0.688351	0.22483	-6.56143	5.65269e-10	7.49428e-09	12.2616	8.12527	down	SERPINA10
-0.372988	0.377647	-6.55988	5.70006e-10	7.55127e-09	12.2535	8.12198	not-sig	SOX5
0.951581	4.25345	6.55969	5.70598e-10	7.5533e-09	12.2525	8.12186	up	RASSF7
-0.264516	2.25723	-6.55953	5.71088e-10	7.55398e-09	12.2517	8.12182	not-sig	SAP30L
-0.352256	3.14911	-6.55882	5.733e-10	7.57392e-09	12.2479	8.12068	not-sig	SSR1
-0.878696	0.499486	-6.55876	5.73475e-10	7.57392e-09	12.2476	8.12068	down	C5orf38
-0.486411	1.08096	-6.55736	5.7783e-10	7.62558e-09	12.2403	8.11773	not-sig	STAT4
-0.658815	0.718475	-6.55493	5.85448e-10	7.7202e-09	12.2275	8.11237	down	PIPOX
0.443751	0.609732	6.55217	5.94231e-10	7.83002e-09	12.2131	8.10624	not-sig	SLC23A3
0.806046	1.48346	6.55129	5.97056e-10	7.86124e-09	12.2084	8.10451	up	KRT15
0.544548	3.06285	6.54934	6.03371e-10	7.92982e-09	12.1982	8.10074	not-sig	BCL10
0.553944	1.23995	6.54925	6.03658e-10	7.92982e-09	12.1978	8.10074	not-sig	DUOX1
-0.564669	0.756987	-6.54916	6.03958e-10	7.92982e-09	12.1973	8.10074	not-sig	EDARADD
0.672378	4.74736	6.54911	6.04107e-10	7.92982e-09	12.197	8.10074	up	UBALD2
-0.297618	2.4545	-6.54704	6.1087e-10	8.01249e-09	12.1862	8.09623	not-sig	NCDN
0.538102	3.71046	6.54392	6.21228e-10	8.14215e-09	12.1699	8.08926	not-sig	AGTRAP
-0.269321	2.65014	-6.54362	6.22237e-10	8.14917e-09	12.1683	8.08889	not-sig	UBE2G1
-0.287067	1.86592	-6.54223	6.26918e-10	8.20425e-09	12.161	8.08596	not-sig	FAM104B
0.721732	1.07974	6.54092	6.31378e-10	8.25012e-09	12.1541	8.08354	up	DUOXA1
-0.430315	0.306364	-6.54091	6.31382e-10	8.25012e-09	12.1541	8.08354	not-sig	XCR1
-0.335613	2.33897	-6.54068	6.32194e-10	8.25447e-09	12.1529	8.08331	not-sig	PIGK
0.716959	4.19777	6.53917	6.37342e-10	8.31538e-09	12.145	8.08012	up	ETHE1
0.792971	5.23492	6.53624	6.47471e-10	8.44115e-09	12.1297	8.0736	up	PYGB
-0.317365	1.50541	-6.53423	6.54539e-10	8.52492e-09	12.1191	8.06931	not-sig	TRIM23
-0.32595	0.659064	-6.53413	6.54887e-10	8.52492e-09	12.1186	8.06931	not-sig	INKA2
-0.616478	1.95854	-6.53373	6.56286e-10	8.53668e-09	12.1165	8.06871	down	IL6R
0.602205	1.54303	6.53258	6.60368e-10	8.58328e-09	12.1105	8.06635	up	NEK2
-0.426307	0.658423	-6.53129	6.64959e-10	8.63644e-09	12.1038	8.06367	not-sig	STK33
-0.531019	0.176957	-6.52846	6.75159e-10	8.76231e-09	12.089	8.05738	not-sig	SLC12A5
-0.26233	0.0726224	-6.52797	6.76934e-10	8.77874e-09	12.0864	8.05657	not-sig	SLC8A3
-0.680168	0.990189	-6.52727	6.79506e-10	8.80545e-09	12.0827	8.05525	down	GFRA1
0.864935	1.63691	6.52635	6.8287e-10	8.8424e-09	12.0779	8.05343	up	C6orf223
-0.280632	1.15005	-6.52483	6.88487e-10	8.90843e-09	12.07	8.0502	not-sig	RPGR
0.603875	3.83864	6.52037	7.05201e-10	9.11785e-09	12.0467	8.04011	up	SLC52A2
-0.3152	2.12903	-6.51723	7.1722e-10	9.26628e-09	12.0302	8.03309	not-sig	RPRD1A
0.659244	3.16885	6.51515	7.2528e-10	9.3634e-09	12.0194	8.02857	up	CHMP4C
0.60314	5.26596	6.51465	7.27233e-10	9.38158e-09	12.0168	8.02772	up	SYNGR2
-0.343357	2.42293	-6.51414	7.29214e-10	9.40009e-09	12.0141	8.02687	not-sig	MTMR12
-0.953376	0.727363	-6.51233	7.3633e-10	9.48473e-09	12.0047	8.02298	down	FEV
-0.277569	1.85303	-6.51152	7.39541e-10	9.51896e-09	12.0005	8.02141	not-sig	SYNRG
0.300611	1.72158	6.50871	7.50794e-10	9.65659e-09	11.9858	8.01518	not-sig	MYO19
-0.341051	1.32593	-6.50815	7.53065e-10	9.67204e-09	11.9828	8.01448	not-sig	SSBP2
-0.799843	0.53772	-6.50814	7.53118e-10	9.67204e-09	11.9828	8.01448	down	CRH
-0.352921	1.41969	-6.50756	7.55457e-10	9.69485e-09	11.9798	8.01346	not-sig	NEK1
-0.547754	1.83444	-6.50617	7.61109e-10	9.75764e-09	11.9725	8.01066	not-sig	LIMCH1
0.637686	3.65014	6.50608	7.61484e-10	9.75764e-09	11.972	8.01066	up	EPHB4
0.585418	4.52136	6.50322	7.7328e-10	9.90143e-09	11.9571	8.0043	up	HCFC1R1
-0.340913	0.30555	-6.50148	7.8053e-10	9.98683e-09	11.948	8.00057	not-sig	NKAPL
-0.590572	3.0418	-6.50119	7.81737e-10	9.99486e-09	11.9465	8.00022	down	CLSTN3
0.375382	2.66947	6.49983	7.87475e-10	1.00607e-08	11.9394	7.99737	not-sig	TAF1D
0.501517	5.61729	6.49773	7.96399e-10	1.01672e-08	11.9285	7.9928	not-sig	HDGF
0.753968	4.92343	6.49477	8.09149e-10	1.03223e-08	11.913	7.98622	up	TMEM54
-0.347615	2.75389	-6.49083	8.26421e-10	1.05349e-08	11.8925	7.97737	not-sig	ELP5
-0.742744	1.29847	-6.48927	8.33359e-10	1.06155e-08	11.8844	7.97406	down	TMEM61
-0.433209	3.94323	-6.487	8.43578e-10	1.07377e-08	11.8726	7.96909	not-sig	TERF2IP
-0.249281	0.06901	-6.48665	8.45142e-10	1.07451e-08	11.8708	7.96879	not-sig	LRRTM2
-0.455098	3.02879	-6.4866	8.45405e-10	1.07451e-08	11.8705	7.96879	not-sig	CREB3L2
-0.553324	1.93286	-6.48531	8.5127e-10	1.08116e-08	11.8637	7.96611	not-sig	TMEM88
0.716118	3.51513	6.48443	8.55266e-10	1.08544e-08	11.8592	7.9644	up	SLC20A1
0.40997	1.90818	6.48413	8.56649e-10	1.08639e-08	11.8576	7.96401	not-sig	ARHGEF5
-0.599585	3.59948	-6.47951	8.78116e-10	1.1128e-08	11.8336	7.95358	down	IL6ST
0.445443	1.01359	6.47831	8.83793e-10	1.11917e-08	11.8273	7.9511	not-sig	FRMD5
-0.248852	0.123483	-6.47623	8.93713e-10	1.1309e-08	11.8165	7.94658	not-sig	PCDH9
1.33284	5.21657	6.47587	8.95414e-10	1.13098e-08	11.8146	7.94654	up	ISG15
0.394335	0.69151	6.47581	8.95715e-10	1.13098e-08	11.8143	7.94654	not-sig	LBX2
0.440143	3.73302	6.4758	8.95749e-10	1.13098e-08	11.8143	7.94654	not-sig	BRI3
0.457619	1.85184	6.47481	9.00527e-10	1.13618e-08	11.8091	7.94455	not-sig	DOCK5
-0.337431	3.46682	-6.47368	9.05968e-10	1.14221e-08	11.8032	7.94225	not-sig	ARMCX3
-0.533366	1.62678	-6.47335	9.07585e-10	1.14341e-08	11.8015	7.9418	not-sig	TMEM150C
1.02878	3.89264	6.47286	9.09947e-10	1.14553e-08	11.799	7.94099	up	ABCC3
-0.388685	2.38057	-6.47273	9.10594e-10	1.14553e-08	11.7983	7.94099	not-sig	GSE1
-0.868635	2.18711	-6.47234	9.12517e-10	1.14711e-08	11.7962	7.9404	down	DNAJC12
0.92854	1.67017	6.46921	9.27936e-10	1.16564e-08	11.78	7.93344	up	WNT10A
0.511245	4.54943	6.46848	9.31556e-10	1.16933e-08	11.7762	7.93206	not-sig	CHP1
0.660873	3.61018	6.46816	9.33148e-10	1.17048e-08	11.7745	7.93164	up	ABHD11
-0.773585	2.75231	-6.46657	9.41113e-10	1.17961e-08	11.7663	7.92826	down	CCND2
-0.921452	2.19856	-6.46639	9.42043e-10	1.17992e-08	11.7653	7.92815	down	BEX5
-0.445991	0.313067	-6.46552	9.46409e-10	1.18427e-08	11.7608	7.92655	not-sig	TACR1
-0.263205	1.52272	-6.46543	9.46891e-10	1.18427e-08	11.7603	7.92655	not-sig	GXYLT1
-0.424121	0.406234	-6.4648	9.50068e-10	1.18738e-08	11.7571	7.92541	not-sig	OSBPL6
0.337574	3.34387	6.46067	9.71328e-10	1.21307e-08	11.7356	7.91611	not-sig	FTSJ1
-0.199702	1.08139	-6.45796	9.85489e-10	1.22986e-08	11.7215	7.91014	not-sig	GIN1
-0.593127	3.75557	-6.45633	9.94114e-10	1.23973e-08	11.713	7.90667	down	PDCD4
-0.37451	0.303156	-6.45571	9.97439e-10	1.24297e-08	11.7098	7.90554	not-sig	LRRC2
-0.523343	0.847127	-6.45531	9.99562e-10	1.24472e-08	11.7077	7.90493	not-sig	ADAMTSL3
-0.344943	1.61395	-6.45476	1.00249e-09	1.24747e-08	11.7049	7.90397	not-sig	LMBRD2
0.308009	2.87015	6.45328	1.01048e-09	1.25649e-08	11.6972	7.90084	not-sig	BTBD10
0.420715	0.928051	6.45084	1.02373e-09	1.27205e-08	11.6845	7.89549	not-sig	RAD54L
-0.347067	2.31091	-6.45009	1.02784e-09	1.27585e-08	11.6806	7.8942	not-sig	RCBTB1
0.635048	3.32682	6.45001	1.02827e-09	1.27585e-08	11.6802	7.8942	up	AVPI1
0.534073	3.28681	6.44845	1.0369e-09	1.28564e-08	11.6721	7.89088	not-sig	ENDOD1
-0.26742	0.121468	-6.44798	1.03948e-09	1.2879e-08	11.6697	7.89012	not-sig	KCNG3
0.99167	2.95788	6.4441	1.06126e-09	1.31395e-08	11.6496	7.88142	up	ANKRD22
-0.355496	4.00611	-6.44212	1.07255e-09	1.32697e-08	11.6393	7.87714	not-sig	SPRYD3
0.36043	3.60765	6.44092	1.07945e-09	1.33456e-08	11.633	7.87466	not-sig	BFAR
-0.374846	2.73111	-6.43895	1.09082e-09	1.34763e-08	11.6229	7.87043	not-sig	NECAP1
-0.213218	1.46673	-6.43833	1.09444e-09	1.35114e-08	11.6197	7.8693	not-sig	TIMM21
-0.827226	0.870386	-6.43709	1.10175e-09	1.35919e-08	11.6132	7.86672	down	FAM131C
0.792128	3.47897	6.43626	1.1066e-09	1.3642e-08	11.6089	7.86512	up	ITPR3
-0.497209	0.739633	-6.43199	1.1321e-09	1.39463e-08	11.5868	7.85554	not-sig	CCDC181
0.419967	1.03756	6.4316	1.13446e-09	1.39655e-08	11.5848	7.85494	not-sig	OIP5
1.3301	3.15511	6.42977	1.14563e-09	1.40752e-08	11.5753	7.85155	up	ERN2
0.420415	1.17843	6.42975	1.14572e-09	1.40752e-08	11.5752	7.85155	not-sig	FAM111B
-0.713242	1.46371	-6.42973	1.14583e-09	1.40752e-08	11.5751	7.85155	down	NRN1
-0.532032	0.493502	-6.42686	1.16355e-09	1.42827e-08	11.5602	7.84519	not-sig	RND2
-0.53608	1.79019	-6.42665	1.16486e-09	1.42887e-08	11.5591	7.84501	not-sig	RAB36
0.634907	1.97606	6.42559	1.17143e-09	1.435e-08	11.5536	7.84315	up	CCNB2
-0.22677	0.944947	-6.42558	1.17153e-09	1.435e-08	11.5535	7.84315	not-sig	PIAS2
-0.355744	4.23704	-6.42513	1.17432e-09	1.4374e-08	11.5512	7.84242	not-sig	RNF167
-0.274836	2.07317	-6.42498	1.17525e-09	1.43751e-08	11.5505	7.84239	not-sig	PEX3
0.833157	1.65402	6.42238	1.19169e-09	1.45658e-08	11.537	7.83667	up	SULT2B1
0.651277	4.56572	6.42044	1.20403e-09	1.47063e-08	11.527	7.8325	up	BLVRB
-0.195848	1.66444	-6.41997	1.20708e-09	1.47331e-08	11.5245	7.83171	not-sig	GCFC2
-0.385787	0.905244	-6.41814	1.2189e-09	1.48667e-08	11.5151	7.82778	not-sig	SHE
0.277642	2.2741	6.41599	1.23292e-09	1.50271e-08	11.5039	7.82312	not-sig	PEX13
-0.238512	1.44215	-6.41536	1.23705e-09	1.50664e-08	11.5007	7.82199	not-sig	CCDC149
-0.31918	2.17851	-6.41519	1.23819e-09	1.50664e-08	11.4998	7.82199	not-sig	TMX3
0.508107	3.22267	6.4151	1.23876e-09	1.50664e-08	11.4993	7.82199	not-sig	VPS37B
-0.356366	0.528072	-6.41458	1.24224e-09	1.5098e-08	11.4966	7.82108	not-sig	ST6GALNAC3
-0.243378	2.8198	-6.41422	1.2446e-09	1.5116e-08	11.4948	7.82056	not-sig	ELOA
0.299751	3.73481	6.41348	1.24955e-09	1.51655e-08	11.4909	7.81914	not-sig	CNOT11
1.80795	2.14486	6.41177	1.26094e-09	1.52929e-08	11.4821	7.81551	up	SPRR1B
-0.483366	0.176102	-6.40972	1.27481e-09	1.54502e-08	11.4715	7.81107	not-sig	AL589765.1
0.462985	3.66211	6.40533	1.30495e-09	1.58044e-08	11.4488	7.80122	not-sig	MYD88
-0.406302	1.68921	-6.40313	1.32028e-09	1.59788e-08	11.4375	7.79646	not-sig	KANK1
-1.16205	0.984363	-6.40164	1.33079e-09	1.60947e-08	11.4298	7.79332	down	CFC1
-0.415439	1.91899	-6.40109	1.33474e-09	1.61311e-08	11.4269	7.79234	not-sig	PM20D2
-0.348004	1.50782	-6.39911	1.34883e-09	1.62899e-08	11.4167	7.78808	not-sig	SLC25A42
-0.332797	2.34024	-6.39774	1.3587e-09	1.63977e-08	11.4096	7.78522	not-sig	MKKS
0.704899	2.77043	6.39637	1.36863e-09	1.6506e-08	11.4025	7.78236	up	FGFRL1
-0.338073	2.01688	-6.39557	1.37452e-09	1.65654e-08	11.3984	7.7808	not-sig	KAT14
-0.332255	3.03943	-6.39435	1.38345e-09	1.66613e-08	11.3921	7.77829	not-sig	SEC63
0.651314	1.21156	6.39387	1.387e-09	1.66924e-08	11.3896	7.77748	up	KPNA7
-0.853255	0.821018	-6.3916	1.4038e-09	1.68829e-08	11.3779	7.77255	down	FBLL1
0.417178	2.60509	6.38984	1.417e-09	1.70297e-08	11.3688	7.76879	not-sig	MEX3D
-0.340362	1.42289	-6.38921	1.42179e-09	1.70753e-08	11.3655	7.76763	not-sig	DOP1A
-0.229764	1.88518	-6.38196	1.47759e-09	1.77331e-08	11.3282	7.75121	not-sig	AC118549.1
-0.504368	1.30507	-6.38069	1.48761e-09	1.7841e-08	11.3216	7.74858	not-sig	TIAM1
-0.408788	0.955444	-6.37853	1.50473e-09	1.80337e-08	11.3105	7.74391	not-sig	ZSWIM5
-0.397393	0.667356	-6.37593	1.52568e-09	1.8272e-08	11.2971	7.73821	not-sig	RGS17
-0.457877	1.90152	-6.37549	1.52925e-09	1.82913e-08	11.2948	7.73776	not-sig	ERN1
-0.334051	2.33629	-6.37547	1.5294e-09	1.82913e-08	11.2947	7.73776	not-sig	UBE2O
0.641779	3.67055	6.37431	1.53882e-09	1.8391e-08	11.2887	7.73539	up	EFNB2
0.836634	2.40938	6.37405	1.54098e-09	1.84041e-08	11.2874	7.73509	up	BCL2L15
-0.401848	0.63337	-6.37272	1.5519e-09	1.85217e-08	11.2805	7.73232	not-sig	EDA
-0.45767	0.320004	-6.37226	1.55567e-09	1.85531e-08	11.2782	7.73158	not-sig	CTXND1
0.554445	2.88291	6.37206	1.55727e-09	1.85531e-08	11.2772	7.73158	not-sig	MVD
0.450259	3.55507	6.372	1.55777e-09	1.85531e-08	11.2768	7.73158	not-sig	ESRRA
-0.404502	2.03471	-6.37036	1.5714e-09	1.86959e-08	11.2684	7.72825	not-sig	MEGF9
0.52459	2.60906	6.3703	1.57192e-09	1.86959e-08	11.2681	7.72825	not-sig	CKS1B
-0.508419	0.47116	-6.36871	1.58525e-09	1.88413e-08	11.2599	7.72489	not-sig	ZCCHC18
-0.237947	3.28099	-6.36427	1.62299e-09	1.92767e-08	11.237	7.71497	not-sig	PPP6C
-0.306701	1.12313	-6.36317	1.63251e-09	1.93763e-08	11.2313	7.71273	not-sig	SLC36A4
-0.598457	1.14841	-6.36256	1.63778e-09	1.94255e-08	11.2282	7.71163	down	GPR27
-0.288387	1.27518	-6.3618	1.64442e-09	1.94909e-08	11.2243	7.71017	not-sig	ZSCAN30
-0.35561	3.04982	-6.3609	1.6523e-09	1.95708e-08	11.2196	7.70839	not-sig	TXNDC15
-0.3522	0.107315	-6.35943	1.66515e-09	1.97094e-08	11.2121	7.70533	not-sig	PHF21B
-0.343064	1.79708	-6.3588	1.67072e-09	1.97617e-08	11.2089	7.70418	not-sig	CBFA2T2
1.33625	2.63525	6.35795	1.67831e-09	1.98379e-08	11.2045	7.7025	up	SLC6A14
0.528615	1.65212	6.35579	1.69764e-09	2.00527e-08	11.1934	7.69783	not-sig	C3orf52
-0.242079	2.21867	-6.35423	1.71169e-09	2.02047e-08	11.1854	7.69455	not-sig	SMARCE1
0.375061	2.05372	6.35239	1.72847e-09	2.03888e-08	11.1759	7.69061	not-sig	SFR1
-0.468176	5.81911	-6.34999	1.75062e-09	2.0636e-08	11.1635	7.68538	not-sig	SARAF
-0.728529	1.00016	-6.34981	1.7522e-09	2.06405e-08	11.1627	7.68528	down	SCN7A
-0.393617	2.63628	-6.34818	1.76742e-09	2.08055e-08	11.1543	7.68182	not-sig	BORCS7
-0.361949	1.82996	-6.34715	1.77705e-09	2.09047e-08	11.149	7.67976	not-sig	BRD3OS
-0.421558	0.164194	-6.34692	1.77926e-09	2.09163e-08	11.1478	7.67951	not-sig	RNF182
-0.260493	0.700552	-6.34591	1.78878e-09	2.10138e-08	11.1426	7.67749	not-sig	IRAK1BP1
-0.235975	1.90014	-6.34309	1.81573e-09	2.1316e-08	11.1281	7.67129	not-sig	UBE2D4
-0.584189	1.91124	-6.34272	1.81924e-09	2.13427e-08	11.1262	7.67075	down	DLG4
0.696404	3.47439	6.34252	1.8212e-09	2.1351e-08	11.1252	7.67058	up	PYCARD
0.902658	0.990376	6.33815	1.86376e-09	2.18327e-08	11.1027	7.66089	up	EREG
-0.351062	1.19936	-6.33804	1.86482e-09	2.18327e-08	11.1022	7.66089	not-sig	ZNF10
-0.578735	1.16637	-6.33698	1.8753e-09	2.19361e-08	11.0967	7.65884	not-sig	SOWAHA
1.12783	3.65229	6.33689	1.8762e-09	2.19361e-08	11.0963	7.65884	up	TMC5
0.843371	1.59012	6.33416	1.90355e-09	2.2232e-08	11.0822	7.65302	up	TNFSF9
-0.273927	2.14771	-6.3341	1.90409e-09	2.2232e-08	11.082	7.65302	not-sig	ICE1
1.05492	2.9168	6.33375	1.90764e-09	2.22584e-08	11.0802	7.65251	up	FOSL1
-0.351246	3.38614	-6.32704	1.97656e-09	2.30469e-08	11.0457	7.63739	not-sig	KIF3B
0.708042	2.77977	6.324	2.0085e-09	2.34035e-08	11.0301	7.63072	up	CLCF1
-0.495423	3.04474	-6.3237	2.01168e-09	2.34247e-08	11.0286	7.63033	not-sig	TNS2
1.07065	6.33595	6.32166	2.03356e-09	2.36635e-08	11.0181	7.62592	up	MMP14
-0.818322	0.747113	-6.32117	2.0388e-09	2.37084e-08	11.0156	7.6251	down	ATP1A3
1.35134	3.66708	6.31984	2.05318e-09	2.38596e-08	11.0088	7.62234	up	EPS8L3
-0.45185	1.43478	-6.31949	2.05697e-09	2.38875e-08	11.007	7.62183	not-sig	VLDLR
-0.215656	1.90586	-6.3161	2.09407e-09	2.43019e-08	10.9897	7.61436	not-sig	UPRT
-0.210713	0.0835134	-6.31578	2.09766e-09	2.43272e-08	10.988	7.61391	not-sig	GHSR
0.646725	4.04618	6.3144	2.113e-09	2.44886e-08	10.9809	7.61104	up	TTYH3
0.600494	1.59114	6.31409	2.11639e-09	2.45114e-08	10.9794	7.61063	up	MELK
-0.258199	1.72831	-6.31302	2.12836e-09	2.46335e-08	10.9739	7.60847	not-sig	APOOL
-0.281474	1.48476	-6.31257	2.13346e-09	2.46759e-08	10.9716	7.60773	not-sig	CCDC126
-0.438046	0.183144	-6.31111	2.14994e-09	2.48498e-08	10.9641	7.60468	not-sig	BTBD17
-0.278419	2.66107	-6.31066	2.15512e-09	2.4893e-08	10.9618	7.60392	not-sig	NEK9
0.75402	2.57862	6.30849	2.17991e-09	2.51624e-08	10.9507	7.59925	up	TPX2
0.692415	2.64891	6.30749	2.19145e-09	2.52787e-08	10.9455	7.59724	up	MXD1
-0.32603	0.138235	-6.3053	2.21692e-09	2.55554e-08	10.9343	7.59252	not-sig	LINGO2
-0.460044	1.40996	-6.30379	2.23466e-09	2.57427e-08	10.9266	7.58935	not-sig	DENND2A
0.619731	2.71677	6.30168	2.25961e-09	2.60127e-08	10.9158	7.58481	up	LPAR2
-0.276095	0.197426	-6.301	2.26773e-09	2.60888e-08	10.9123	7.58355	not-sig	ZNF382
-0.477739	0.882052	-6.30036	2.27538e-09	2.61593e-08	10.9091	7.58237	not-sig	SLC25A34
-0.340633	2.35883	-6.29966	2.2838e-09	2.62386e-08	10.9055	7.58106	not-sig	RAP2A
-0.219095	1.3187	-6.29924	2.28889e-09	2.62685e-08	10.9033	7.58056	not-sig	PIK3C3
0.356616	4.54419	6.29919	2.28946e-09	2.62685e-08	10.9031	7.58056	not-sig	TNIP1
0.520657	1.04244	6.2977	2.3075e-09	2.64497e-08	10.8955	7.57758	not-sig	EPPK1
-0.34503	0.127293	-6.29763	2.30832e-09	2.64497e-08	10.8951	7.57758	not-sig	ACSL6
0.310554	2.51074	6.29486	2.34232e-09	2.68214e-08	10.8809	7.57152	not-sig	TMEM223
-0.547812	1.2453	-6.29373	2.35628e-09	2.69467e-08	10.8752	7.56949	not-sig	SLC25A27
-0.443041	1.03449	-6.29372	2.35639e-09	2.69467e-08	10.8751	7.56949	not-sig	CASTOR2
-0.518103	1.46735	-6.29241	2.37272e-09	2.71065e-08	10.8684	7.56693	not-sig	PCDH17
1.03544	5.44136	6.29235	2.37351e-09	2.71065e-08	10.8681	7.56693	up	IER3
-0.56234	0.256575	-6.2915	2.38415e-09	2.72087e-08	10.8637	7.56529	not-sig	ATCAY
-0.22613	1.66251	-6.29138	2.38562e-09	2.72087e-08	10.8631	7.56529	not-sig	FAM114A2
0.571537	3.98375	6.28638	2.44921e-09	2.79155e-08	10.8376	7.55415	not-sig	DNTTIP1
-0.219381	0.801044	-6.28469	2.47115e-09	2.81469e-08	10.829	7.55057	not-sig	ZKSCAN2
-0.333646	1.2497	-6.28434	2.47566e-09	2.81796e-08	10.8272	7.55006	not-sig	PARP11
0.306133	2.91603	6.28138	2.51461e-09	2.86041e-08	10.812	7.54357	not-sig	PDCD10
1.03438	1.5654	6.28115	2.51756e-09	2.86188e-08	10.8109	7.54335	up	ALDH3A1
-0.582197	1.17371	-6.28048	2.5265e-09	2.87015e-08	10.8075	7.5421	down	ABCC9
0.581678	2.39315	6.27804	2.55911e-09	2.90527e-08	10.795	7.53681	up	NUSAP1
-0.211992	1.51521	-6.27789	2.5612e-09	2.90573e-08	10.7942	7.53674	not-sig	DPY19L3
0.533874	4.87477	6.2776	2.56501e-09	2.90804e-08	10.7928	7.5364	not-sig	APRT
-0.259288	2.43072	-6.27749	2.56661e-09	2.90804e-08	10.7922	7.5364	not-sig	FBXO31
-0.396908	1.92871	-6.27657	2.57903e-09	2.91974e-08	10.7875	7.53466	not-sig	CYP4V2
0.60361	2.15548	6.27647	2.58033e-09	2.91974e-08	10.787	7.53466	up	BBC3
-1.0574	1.33462	-6.27618	2.58429e-09	2.9223e-08	10.7855	7.53428	down	PCP4
0.388882	4.70257	6.27464	2.60537e-09	2.94421e-08	10.7776	7.53103	not-sig	SHISA5
-0.267512	1.76288	-6.27418	2.61163e-09	2.94935e-08	10.7753	7.53027	not-sig	DENND4A
-0.212521	1.45959	-6.27194	2.64259e-09	2.98235e-08	10.7639	7.52544	not-sig	AASDH
1.44804	3.58219	6.27075	2.65907e-09	2.99899e-08	10.7578	7.52303	up	CYP2S1
-0.68937	5.77854	-6.26988	2.67138e-09	3.0109e-08	10.7534	7.5213	down	GNAS
-0.296359	0.906646	-6.26782	2.70038e-09	3.0416e-08	10.7429	7.5169	not-sig	SIRT4
-0.576126	0.72157	-6.2669	2.71343e-09	3.05429e-08	10.7382	7.51509	not-sig	KLKB1
-0.509843	1.52132	-6.26635	2.72133e-09	3.06119e-08	10.7354	7.51411	not-sig	NPR1
0.396731	2.42807	6.26176	2.78774e-09	3.13263e-08	10.712	7.50409	not-sig	LRRC1
-0.478311	2.7705	-6.26171	2.78848e-09	3.13263e-08	10.7117	7.50409	not-sig	SOAT1
0.938173	5.82806	6.2596	2.81957e-09	3.16549e-08	10.701	7.49956	up	BHLHE40
-0.659934	0.593933	-6.25933	2.8235e-09	3.16592e-08	10.6996	7.4995	down	RELN
-0.368382	1.53235	-6.25933	2.82363e-09	3.16592e-08	10.6996	7.4995	not-sig	HCFC2
-0.336077	1.26972	-6.25912	2.82674e-09	3.16619e-08	10.6985	7.49946	not-sig	KPNA5
1.1804	2.23295	6.25906	2.82755e-09	3.16619e-08	10.6982	7.49946	up	CALB2
0.884664	2.7353	6.25856	2.83504e-09	3.17251e-08	10.6957	7.4986	up	CLDN23
-0.294685	2.38366	-6.25803	2.84292e-09	3.17927e-08	10.693	7.49767	not-sig	GALNT11
-0.322743	3.47962	-6.25689	2.85997e-09	3.19626e-08	10.6872	7.49536	not-sig	PCMT1
0.779548	4.65274	6.25603	2.87294e-09	3.20867e-08	10.6828	7.49367	up	TSTA3
-1.74377	1.71334	-6.25501	2.88828e-09	3.22371e-08	10.6776	7.49164	down	IAPP
0.541094	1.6515	6.25349	2.91148e-09	3.24751e-08	10.6699	7.48845	not-sig	RNF207
-0.17092	1.89195	-6.2531	2.91742e-09	3.25202e-08	10.6679	7.48785	not-sig	RIOK2
-0.459237	0.608194	-6.25129	2.94524e-09	3.28092e-08	10.6587	7.484	not-sig	RPS6KA6
0.826041	3.23348	6.25024	2.96158e-09	3.2954e-08	10.6533	7.48209	up	OAS1
-0.313184	1.35087	-6.25021	2.96207e-09	3.2954e-08	10.6531	7.48209	not-sig	TNRC6C
-0.643639	1.66237	-6.24862	2.98686e-09	3.32083e-08	10.6451	7.47875	down	GNG7
-0.285386	2.8726	-6.2467	3.01697e-09	3.35215e-08	10.6353	7.47468	not-sig	IP6K1
-0.495592	0.44258	-6.24352	3.06781e-09	3.40643e-08	10.6191	7.4677	not-sig	DIRAS2
-0.223748	2.98434	-6.24284	3.07866e-09	3.41628e-08	10.6157	7.46645	not-sig	RPL7L1
-0.441385	2.00643	-6.23984	3.12757e-09	3.46832e-08	10.6004	7.45988	not-sig	SLC43A2
-0.49227	2.99559	-6.23833	3.15236e-09	3.49356e-08	10.5927	7.45673	not-sig	ZKSCAN1
-0.370016	3.07389	-6.23603	3.19061e-09	3.53368e-08	10.581	7.45177	not-sig	STAT5B
0.303885	2.92224	6.23591	3.19266e-09	3.53368e-08	10.5804	7.45177	not-sig	PSEN1
1.10149	2.63927	6.2353	3.20284e-09	3.54266e-08	10.5773	7.45067	up	RHOV
0.511827	1.54722	6.23322	3.23784e-09	3.57908e-08	10.5668	7.44623	not-sig	PCLAF
0.636	2.10283	6.23261	3.24824e-09	3.58827e-08	10.5637	7.44511	up	NUDT8
-0.260869	1.81649	-6.23218	3.25555e-09	3.59404e-08	10.5615	7.44442	not-sig	ERMAP
-0.354773	0.701636	-6.23181	3.26185e-09	3.59869e-08	10.5596	7.44386	not-sig	ZNF582
-0.330878	2.59208	-6.2316	3.26555e-09	3.60046e-08	10.5585	7.44364	not-sig	RAB11FIP3
0.73744	3.68793	6.22915	3.30768e-09	3.64459e-08	10.5461	7.43835	up	MGLL
-0.511103	1.13434	-6.22779	3.33129e-09	3.66826e-08	10.5392	7.43554	not-sig	ARG2
0.532661	2.53873	6.22582	3.36587e-09	3.70397e-08	10.5292	7.43133	not-sig	KCNK6
0.808479	2.63659	6.22511	3.37831e-09	3.71478e-08	10.5256	7.43007	up	CDC20
-0.325784	0.43157	-6.22501	3.38001e-09	3.71478e-08	10.5251	7.43007	not-sig	GPR75
-0.353177	2.52029	-6.22418	3.39477e-09	3.72861e-08	10.5209	7.42845	not-sig	ARHGAP35
-0.422217	1.69924	-6.21983	3.47297e-09	3.81207e-08	10.4988	7.41884	not-sig	SASH1
0.446489	1.16875	6.21768	3.5123e-09	3.85279e-08	10.4879	7.41422	not-sig	TMEM154
0.50768	1.81834	6.21735	3.51824e-09	3.85686e-08	10.4862	7.41377	not-sig	HRH1
-0.566716	1.66611	-6.21656	3.53281e-09	3.87036e-08	10.4822	7.41225	not-sig	ENPP5
0.811766	2.18453	6.21479	3.5657e-09	3.90391e-08	10.4732	7.4085	up	HOXB6
0.505221	0.569037	6.2133	3.59351e-09	3.93186e-08	10.4657	7.4054	not-sig	PSORS1C2
-0.494759	1.17468	-6.21227	3.61297e-09	3.95041e-08	10.4605	7.40336	not-sig	PDE2A
-0.321966	2.37525	-6.21216	3.61506e-09	3.95041e-08	10.4599	7.40336	not-sig	SMAD5
-0.248816	0.75022	-6.20992	3.65763e-09	3.9944e-08	10.4485	7.39855	not-sig	ARMC2
-0.709844	2.58227	-6.20975	3.66085e-09	3.99538e-08	10.4477	7.39844	down	SCD5
0.423446	4.13349	6.20905	3.67433e-09	4.0062e-08	10.4441	7.39727	not-sig	DIAPH1
0.361289	0.434657	6.20899	3.67541e-09	4.0062e-08	10.4438	7.39727	not-sig	SMCO2
-0.966393	1.18658	-6.20839	3.687e-09	4.01629e-08	10.4408	7.39617	down	KIRREL2
-0.318035	0.267716	-6.20707	3.71253e-09	4.04154e-08	10.4341	7.39345	not-sig	ZNF280B
-0.327469	0.776225	-6.2056	3.74123e-09	4.07021e-08	10.4266	7.39038	not-sig	DRC3
-0.413307	1.56095	-6.20478	3.75714e-09	4.08494e-08	10.4225	7.38881	not-sig	KIF3A
-0.511958	4.24008	-6.20296	3.79307e-09	4.1214e-08	10.4133	7.38495	not-sig	EPAS1
-0.38394	1.68806	-6.20019	3.84844e-09	4.17893e-08	10.3992	7.37894	not-sig	PIK3R3
0.425279	0.978911	6.1987	3.87848e-09	4.20889e-08	10.3917	7.37583	not-sig	PCSK6
0.229337	2.44245	6.19524	3.9491e-09	4.28139e-08	10.3742	7.36842	not-sig	ZPR1
0.429024	3.90903	6.19518	3.95026e-09	4.28139e-08	10.3739	7.36842	not-sig	SHARPIN
-0.255811	1.66754	-6.19493	3.95551e-09	4.28439e-08	10.3726	7.36811	not-sig	TECPR2
-0.227847	1.36543	-6.19334	3.98842e-09	4.31704e-08	10.3646	7.36481	not-sig	TUBD1
-0.891387	2.63259	-6.19323	3.99067e-09	4.31704e-08	10.364	7.36481	down	ITM2A
0.624392	2.10558	6.19158	4.02513e-09	4.35158e-08	10.3557	7.36135	up	RRM2
-0.506394	0.805316	-6.19136	4.02988e-09	4.35399e-08	10.3545	7.36111	not-sig	GHR
0.717426	0.90933	6.18804	4.10013e-09	4.42711e-08	10.3378	7.35388	up	RAET1L
-0.364589	1.07604	-6.18726	4.117e-09	4.44254e-08	10.3338	7.35237	not-sig	B4GALT6
-0.207603	1.84725	-6.18498	4.1662e-09	4.49282e-08	10.3223	7.34748	not-sig	NAA30
-0.248419	2.2887	-6.18348	4.19881e-09	4.52516e-08	10.3147	7.34437	not-sig	EXOC2
-0.199052	0.903861	-6.18325	4.20401e-09	4.52667e-08	10.3135	7.34422	not-sig	ZNF684
0.381289	2.30879	6.18318	4.20548e-09	4.52667e-08	10.3132	7.34422	not-sig	MRPS6
0.858289	2.27326	6.18162	4.23975e-09	4.55944e-08	10.3053	7.34109	up	PRRX2
0.84247	3.90148	6.18156	4.24122e-09	4.55944e-08	10.305	7.34109	up	LFNG
-0.253303	2.61884	-6.18136	4.24548e-09	4.56118e-08	10.304	7.34092	not-sig	ABHD10
-0.401835	1.869	-6.17921	4.2933e-09	4.60968e-08	10.2931	7.33633	not-sig	AP1S2
-0.232753	1.43718	-6.17866	4.30563e-09	4.62004e-08	10.2904	7.33535	not-sig	FAM92A
-0.228541	1.74701	-6.17762	4.32897e-09	4.64219e-08	10.2851	7.33328	not-sig	ENOX2
0.745239	6.2247	6.17617	4.36198e-09	4.67467e-08	10.2778	7.33025	up	MARCKSL1
-0.470475	2.00315	-6.1748	4.39315e-09	4.70515e-08	10.2709	7.32743	not-sig	FZD4
-0.346058	3.29526	-6.17421	4.4067e-09	4.71673e-08	10.2679	7.32636	not-sig	TDP2
0.750044	4.9533	6.17394	4.41281e-09	4.72034e-08	10.2665	7.32603	up	QSOX1
0.405237	3.45999	6.17142	4.47111e-09	4.77973e-08	10.2538	7.3206	not-sig	MAP4K4
0.508565	2.89973	6.17119	4.47656e-09	4.78259e-08	10.2526	7.32034	not-sig	MICA
-0.283798	2.56864	-6.17013	4.50119e-09	4.80592e-08	10.2473	7.31822	not-sig	BLOC1S6
-0.318034	2.13845	-6.16952	4.51558e-09	4.81829e-08	10.2442	7.31711	not-sig	ETFRF1
-0.258623	1.04888	-6.16851	4.5395e-09	4.84082e-08	10.2391	7.31508	not-sig	ZNF821
-0.4153	4.92724	-6.16758	4.56143e-09	4.86119e-08	10.2344	7.31326	not-sig	CALM1
-0.48514	0.639118	-6.16473	4.62965e-09	4.93085e-08	10.22	7.30708	not-sig	ENHO
-0.459437	0.369962	-6.16434	4.63907e-09	4.93782e-08	10.218	7.30646	not-sig	TDRD9
-0.637577	1.52931	-6.16365	4.65575e-09	4.95252e-08	10.2146	7.30517	down	SV2A
-0.406172	1.71023	-6.16278	4.67676e-09	4.9718e-08	10.2102	7.30349	not-sig	TCTN1
-0.35184	0.217328	-6.16245	4.68482e-09	4.9773e-08	10.2085	7.30301	not-sig	PAK5
-0.346731	0.981118	-6.16161	4.70537e-09	4.99605e-08	10.2043	7.30137	not-sig	KLHDC1
-0.58277	0.603431	-6.16107	4.71863e-09	5.00704e-08	10.2015	7.30042	down	B3GALT2
0.615615	3.20217	6.16027	4.73834e-09	5.02486e-08	10.1975	7.29888	up	MCU
0.411841	2.49715	6.15937	4.76038e-09	5.04513e-08	10.193	7.29713	not-sig	SP100
-0.563853	2.31393	-6.1589	4.77223e-09	5.05292e-08	10.1906	7.29646	not-sig	ATP8B2
1.20148	3.23735	6.15884	4.7736e-09	5.05292e-08	10.1903	7.29646	up	CDA
-0.388865	1.72263	-6.15741	4.80925e-09	5.08753e-08	10.1831	7.29349	not-sig	TTC8
-0.367024	0.14076	-6.15689	4.82214e-09	5.09803e-08	10.1805	7.2926	not-sig	ADGRV1
0.370173	2.04349	6.15523	4.86409e-09	5.13923e-08	10.1721	7.2891	not-sig	MLKL
-0.499257	1.05385	-6.15326	4.91415e-09	5.18893e-08	10.1622	7.28492	not-sig	KIAA1324L
0.429708	1.27304	6.15305	4.91959e-09	5.19149e-08	10.1611	7.28471	not-sig	MOCOS
0.458043	0.889941	6.15119	4.96732e-09	5.23865e-08	10.1518	7.28078	not-sig	RTKN2
-0.37497	1.24277	-6.1503	4.9903e-09	5.25695e-08	10.1473	7.27927	not-sig	MVB12B
-0.547911	0.775633	-6.15028	4.99077e-09	5.25695e-08	10.1472	7.27927	not-sig	PACRG
-0.315141	0.652076	-6.15016	4.99394e-09	5.25707e-08	10.1466	7.27926	not-sig	ZFP2
0.832316	1.35651	6.1494	5.01374e-09	5.27469e-08	10.1427	7.2778	up	ESPN
0.513695	4.34418	6.14863	5.03365e-09	5.2924e-08	10.1389	7.27635	not-sig	PLIN3
-0.858469	2.59677	-6.14642	5.09197e-09	5.35045e-08	10.1277	7.27161	down	GIMAP7
-0.604854	2.5923	-6.14557	5.11441e-09	5.37076e-08	10.1235	7.26996	down	TSPYL2
0.460536	3.79384	6.14477	5.13569e-09	5.38982e-08	10.1194	7.26843	not-sig	HK1
0.728348	1.9169	6.14345	5.17091e-09	5.42176e-08	10.1128	7.26586	up	ANLN
-0.325294	3.65041	-6.1434	5.17242e-09	5.42176e-08	10.1125	7.26586	not-sig	FBXL5
-0.723638	0.792302	-6.14261	5.19373e-09	5.44078e-08	10.1085	7.26434	down	CDH22
-0.225835	1.63173	-6.13986	5.26832e-09	5.51556e-08	10.0947	7.25841	not-sig	C22orf39
-0.59798	0.48615	-6.13393	5.43291e-09	5.68442e-08	10.0649	7.24531	down	LMO1
-0.393053	0.213286	-6.1293	5.56486e-09	5.81894e-08	10.0416	7.23516	not-sig	FSTL5
-0.48866	0.976267	-6.12868	5.58294e-09	5.83431e-08	10.0385	7.23401	not-sig	LGI2
0.850169	2.74068	6.12753	5.61628e-09	5.86559e-08	10.0327	7.23169	up	SLC45A3
-0.36459	0.524705	-6.12704	5.63066e-09	5.87705e-08	10.0302	7.23084	not-sig	KLHL13
-0.2623	2.25891	-6.12666	5.64158e-09	5.88488e-08	10.0284	7.23026	not-sig	SENP6
-0.315929	0.163777	-6.123	5.74977e-09	5.9941e-08	10.0099	7.22228	not-sig	S100Z
-0.394614	1.47403	-6.12207	5.7775e-09	6.01937e-08	10.0053	7.22045	not-sig	PPP1R3E
-0.369396	0.190038	-6.1195	5.85489e-09	6.0963e-08	9.99239	7.21493	not-sig	CCNA1
0.333203	4.25295	6.11934	5.8598e-09	6.09773e-08	9.99157	7.21483	not-sig	CBX3
-0.317344	1.64095	-6.1184	5.88848e-09	6.12103e-08	9.98684	7.21318	not-sig	CDC40
0.806659	7.54157	6.11837	5.88929e-09	6.12103e-08	9.98671	7.21318	up	HSPB1
0.899318	1.27498	6.11791	5.90335e-09	6.13193e-08	9.9844	7.2124	up	BIRC7
0.582026	1.28812	6.11754	5.91466e-09	6.1386e-08	9.98254	7.21193	up	ADGRF4
-0.707104	1.81675	-6.11747	5.9169e-09	6.1386e-08	9.98217	7.21193	down	SERPINF2
-0.335067	4.4429	-6.11717	5.92602e-09	6.14437e-08	9.98068	7.21152	not-sig	C6orf62
2.49884	5.29248	6.11672	5.9397e-09	6.15484e-08	9.97845	7.21078	up	CEACAM5
0.742262	3.89295	6.11494	5.99496e-09	6.20837e-08	9.96947	7.20702	up	CKS2
0.409831	6.02395	6.11368	6.03408e-09	6.24513e-08	9.96317	7.20446	not-sig	CAPNS1
0.784107	3.38268	6.11333	6.04493e-09	6.24537e-08	9.96142	7.20444	up	MYRF
0.589641	3.01839	6.11332	6.04518e-09	6.24537e-08	9.96138	7.20444	up	SMOX
0.447171	4.99064	6.11326	6.04709e-09	6.24537e-08	9.96108	7.20444	not-sig	TALDO1
-0.252314	1.14648	-6.11314	6.05087e-09	6.24537e-08	9.96047	7.20444	not-sig	ZBTB39
0.624382	0.99987	6.11309	6.05245e-09	6.24537e-08	9.96022	7.20444	up	POU2F3
0.422631	4.98294	6.11238	6.07466e-09	6.25916e-08	9.95667	7.20348	not-sig	TRIM8
-0.471465	1.29206	-6.11234	6.07596e-09	6.25916e-08	9.95646	7.20348	not-sig	FAM171B
-0.438052	1.17214	-6.11232	6.07672e-09	6.25916e-08	9.95634	7.20348	not-sig	RNF157
0.712624	3.80627	6.11214	6.08231e-09	6.26118e-08	9.95545	7.20334	up	IRF6
-0.395353	0.797409	-6.1114	6.10563e-09	6.28143e-08	9.95174	7.20194	not-sig	MICU3
-0.255763	1.77565	-6.11092	6.12096e-09	6.29e-08	9.94931	7.20135	not-sig	AGTPBP1
0.454747	2.09004	6.11091	6.12126e-09	6.29e-08	9.94926	7.20135	not-sig	TTC22
-0.224087	1.56514	-6.11029	6.14082e-09	6.30634e-08	9.94617	7.20022	not-sig	TRMO
-0.404716	0.145243	-6.11	6.15018e-09	6.31219e-08	9.94469	7.19982	not-sig	GABRG2
-0.198089	1.26916	-6.10733	6.23558e-09	6.39602e-08	9.93133	7.19409	not-sig	RAD51C
-0.367257	0.411004	-6.10495	6.31307e-09	6.47165e-08	9.91936	7.18898	not-sig	TRMT9B
-0.184976	0.0512079	-6.10442	6.33029e-09	6.48544e-08	9.91672	7.18806	not-sig	ANKRD34C
-0.220399	2.12578	-6.1041	6.34082e-09	6.49236e-08	9.91511	7.1876	not-sig	TXNL1
-0.365656	0.372165	-6.10218	6.40413e-09	6.55329e-08	9.90548	7.18354	not-sig	KCNT2
0.537195	1.86153	6.102	6.40992e-09	6.55533e-08	9.9046	7.18341	not-sig	PROSER2
-0.437172	1.04646	-6.09934	6.49889e-09	6.64237e-08	9.89124	7.17768	not-sig	TUB
0.529042	1.51182	6.09819	6.53747e-09	6.67783e-08	9.88551	7.17536	not-sig	DLGAP5
0.339714	4.72111	6.09723	6.56998e-09	6.70706e-08	9.8807	7.17347	not-sig	SF3B6
1.24251	2.9247	6.09313	6.7108e-09	6.84677e-08	9.86015	7.16451	up	SPDEF
0.885476	1.74861	6.09285	6.72046e-09	6.85256e-08	9.85875	7.16415	up	ITPKA
-0.35976	1.74812	-6.09272	6.72491e-09	6.85304e-08	9.85811	7.16412	not-sig	CAB39L
-0.417161	0.795902	-6.0909	6.7884e-09	6.91273e-08	9.849	7.16035	not-sig	KCNJ2
-0.257522	1.46609	-6.09081	6.79151e-09	6.91273e-08	9.84856	7.16035	not-sig	WWOX
-0.411214	5.22886	-6.09037	6.80715e-09	6.92455e-08	9.84633	7.15961	not-sig	EID1
0.522151	2.87487	6.09006	6.81797e-09	6.93147e-08	9.84479	7.15917	not-sig	PRKCI
0.381065	3.14404	6.08848	6.87378e-09	6.98408e-08	9.83689	7.15589	not-sig	HDAC7
-0.680411	2.40748	-6.08803	6.88996e-09	6.9964e-08	9.83461	7.15513	down	SYT11
-0.268022	0.16665	-6.08736	6.91372e-09	7.01639e-08	9.83128	7.15389	not-sig	TMEM108
-0.46467	0.951947	-6.08719	6.91967e-09	7.01829e-08	9.83044	7.15377	not-sig	C5
0.805663	0.959051	6.0811	7.14083e-09	7.23312e-08	9.79996	7.14067	up	CYP2W1
0.276489	2.7541	6.08109	7.1411e-09	7.23312e-08	9.79992	7.14067	not-sig	CDK7
-0.617091	2.56789	-6.08101	7.14408e-09	7.23312e-08	9.79951	7.14067	down	BACE1
0.368049	2.19262	6.07904	7.21696e-09	7.30262e-08	9.78968	7.13652	not-sig	CDCA4
-0.278795	1.26094	-6.07889	7.22274e-09	7.30417e-08	9.7889	7.13643	not-sig	USP13
-0.242376	1.88144	-6.07857	7.23473e-09	7.312e-08	9.7873	7.13596	not-sig	SBNO1
0.545692	0.490408	6.07771	7.26673e-09	7.33657e-08	9.78302	7.13451	not-sig	DMBX1
-0.18469	1.15975	-6.07769	7.26756e-09	7.33657e-08	9.78291	7.13451	not-sig	TAF5
-0.207509	1.48373	-6.07745	7.27658e-09	7.34137e-08	9.78171	7.13422	not-sig	AP5S1
0.883805	3.05183	6.07539	7.35413e-09	7.41527e-08	9.77144	7.12987	up	FUT2
-0.471265	1.57459	-6.07513	7.36424e-09	7.42112e-08	9.7701	7.12953	not-sig	B9D1
-0.30815	1.81433	-6.0733	7.43406e-09	7.4871e-08	9.76096	7.12569	not-sig	NEURL4
-0.32702	1.51128	-6.07165	7.49728e-09	7.54635e-08	9.75276	7.12226	not-sig	KAT6B
0.627705	2.81719	6.07114	7.51713e-09	7.56192e-08	9.75019	7.12137	up	MPST
0.343293	5.3168	6.06921	7.59216e-09	7.63293e-08	9.74057	7.11731	not-sig	HNRNPF
0.457346	3.36513	6.0666	7.6952e-09	7.73202e-08	9.72751	7.11171	not-sig	BAK1
-0.269352	2.22434	-6.06597	7.72002e-09	7.75243e-08	9.72439	7.11056	not-sig	FIG4
0.547282	3.76978	6.06568	7.73178e-09	7.75972e-08	9.72291	7.11015	not-sig	RIOK3
-0.266621	0.08265	-6.06462	7.77402e-09	7.79756e-08	9.71763	7.10804	not-sig	DACH2
0.574184	5.41777	6.0637	7.81115e-09	7.83024e-08	9.71302	7.10622	not-sig	ZYX
0.396148	1.85457	6.05968	7.97443e-09	7.98927e-08	9.69297	7.09749	not-sig	NDE1
-0.807399	1.28683	-6.05849	8.02352e-09	8.03379e-08	9.68703	7.09508	down	TMEM59L
-0.297389	0.23071	-6.05627	8.11566e-09	8.12132e-08	9.67596	7.09037	not-sig	PDE1C
-0.512249	2.57412	-6.05482	8.17638e-09	8.17733e-08	9.66874	7.08739	not-sig	TP53INP1
-0.162277	1.743	-6.05465	8.18364e-09	8.17984e-08	9.66788	7.08726	not-sig	CNOT4
-0.572675	0.622482	-6.0545	8.19008e-09	8.18153e-08	9.66712	7.08717	not-sig	GLP1R
-0.276414	2.62701	-6.05386	8.21707e-09	8.20374e-08	9.66393	7.08599	not-sig	KCTD2
-0.234381	0.0925237	-6.05229	8.28363e-09	8.26539e-08	9.65612	7.08274	not-sig	LRFN2
0.61021	1.98956	6.05183	8.30313e-09	8.28005e-08	9.65384	7.08197	up	CELSR1
-0.336495	0.14396	-6.05162	8.31203e-09	8.28413e-08	9.6528	7.08175	not-sig	ADGRF3
-0.470613	1.76899	-6.05079	8.34779e-09	8.31496e-08	9.64864	7.08014	not-sig	NUAK2
-0.635422	0.307307	-6.04999	8.38223e-09	8.34153e-08	9.64465	7.07875	down	C22orf42
1.56235	2.89341	6.04994	8.38416e-09	8.34153e-08	9.64443	7.07875	up	CST6
0.989996	2.51913	6.04828	8.4563e-09	8.40846e-08	9.63613	7.07528	up	CEMIP
0.709607	1.48327	6.04804	8.46664e-09	8.41388e-08	9.63494	7.075	up	CYP4F12
0.504658	1.54735	6.04767	8.48282e-09	8.4251e-08	9.6331	7.07443	not-sig	CENPF
-0.584569	1.6145	-6.04656	8.53152e-09	8.46858e-08	9.62755	7.07219	down	SEMA3G
-0.221498	2.84767	-6.04633	8.54161e-09	8.47371e-08	9.6264	7.07193	not-sig	UBR7
-0.409315	0.301864	-6.04571	8.5687e-09	8.49569e-08	9.62334	7.0708	not-sig	VIT
-0.345522	2.02037	-6.04513	8.59448e-09	8.51635e-08	9.62043	7.06975	not-sig	YPEL2
0.828984	1.44682	6.04384	8.65134e-09	8.56776e-08	9.61404	7.06713	up	LGR6
-0.365627	1.31722	-6.04113	8.77271e-09	8.68296e-08	9.60054	7.06133	not-sig	ZNF844
-0.397667	2.73124	-6.03596	9.00925e-09	8.90326e-08	9.57477	7.05045	not-sig	FBXO21
-0.449199	1.88011	-6.03594	9.01019e-09	8.90326e-08	9.57467	7.05045	not-sig	RRAGD
0.310055	0.565767	6.03592	9.01079e-09	8.90326e-08	9.5746	7.05045	not-sig	CKLF-CMTM1
-0.345087	0.440744	-6.03575	9.01857e-09	8.90583e-08	9.57377	7.05033	not-sig	SCN8A
-0.361581	1.127	-6.03278	9.1572e-09	9.03755e-08	9.55899	7.04395	not-sig	PLD6
-0.391199	2.01743	-6.0303	9.27469e-09	9.14826e-08	9.54664	7.03866	not-sig	SLC1A4
-0.418316	2.11545	-6.02836	9.36772e-09	9.23473e-08	9.53697	7.03458	not-sig	PMM1
0.481674	1.92776	6.02536	9.51298e-09	9.37257e-08	9.52207	7.02814	not-sig	FZD2
-0.460277	1.47692	-6.02333	9.61274e-09	9.46028e-08	9.51196	7.0241	not-sig	TMEM198
0.270184	3.58048	6.02332	9.61299e-09	9.46028e-08	9.51194	7.0241	not-sig	UBAC2
0.710247	4.77015	6.023	9.62897e-09	9.46804e-08	9.51033	7.02374	up	CEBPB
1.09103	4.45236	6.02294	9.63187e-09	9.46804e-08	9.51004	7.02374	up	C15orf48
-0.423697	1.33849	-6.02224	9.66631e-09	9.49647e-08	9.50658	7.02244	not-sig	EML1
-0.333166	1.82908	-6.0189	9.83342e-09	9.65514e-08	9.48998	7.01524	not-sig	ZNF25
-0.355572	3.31918	-6.01828	9.86481e-09	9.68044e-08	9.48689	7.0141	not-sig	ZMYND11
-0.377814	3.09052	-6.01814	9.87184e-09	9.68182e-08	9.4862	7.01404	not-sig	TMEM263
0.377196	5.29894	6.01786	9.88588e-09	9.69008e-08	9.48482	7.01367	not-sig	PPIA
-0.429391	1.02523	-6.01749	9.9049e-09	9.7032e-08	9.48296	7.01309	not-sig	FCN3
-0.237472	2.57702	-6.01616	9.97279e-09	9.76415e-08	9.47635	7.01037	not-sig	MBD1
-0.478425	0.574925	-6.01465	1.00501e-08	9.83424e-08	9.46887	7.00726	not-sig	P2RY12
-0.683188	1.08825	-6.01207	1.01839e-08	9.95953e-08	9.45606	7.00176	down	VAT1L
0.996997	2.76855	6.00965	1.03111e-08	1.00753e-07	9.44403	6.99674	up	RFLNA
0.675423	2.05236	6.00959	1.0314e-08	1.00753e-07	9.44376	6.99674	up	HOXB5
-0.59743	0.506736	-6.0049	1.05651e-08	1.03147e-07	9.42046	6.98654	down	NEFL
0.521153	3.37964	6.00413	1.06065e-08	1.03493e-07	9.41668	6.98509	not-sig	DGAT1
0.391684	0.988017	6.00364	1.0633e-08	1.03693e-07	9.41426	6.98425	not-sig	ASPM
-0.46558	0.528401	-6.00343	1.06447e-08	1.03748e-07	9.4132	6.98402	not-sig	JAKMIP2
-0.728229	0.58562	-6.00154	1.07482e-08	1.04698e-07	9.40382	6.98006	down	CBLN1
-0.323287	3.50343	-6.0007	1.07946e-08	1.05045e-07	9.39965	6.97863	not-sig	ISCU
0.763441	1.78633	6.00067	1.0796e-08	1.05045e-07	9.39952	6.97863	up	SCT
-0.165876	0.0498974	-6.00047	1.08074e-08	1.05096e-07	9.3985	6.97841	not-sig	MANSC4
-0.471682	1.16935	-6.00022	1.08209e-08	1.05168e-07	9.39729	6.97812	not-sig	CORO2B
0.386402	4.10187	5.99946	1.08631e-08	1.05518e-07	9.39353	6.97667	not-sig	RNPEP
-0.289864	2.85074	-5.9977	1.09613e-08	1.06412e-07	9.38481	6.97301	not-sig	PHF10
0.507071	2.31852	5.99585	1.1066e-08	1.07368e-07	9.37561	6.96912	not-sig	DGKA
0.564807	2.60188	5.99282	1.12385e-08	1.0898e-07	9.36063	6.96265	not-sig	UBE2T
-0.592149	1.15284	-5.9927	1.12456e-08	1.08988e-07	9.36001	6.96262	down	NDRG4
-0.291267	1.18252	-5.99153	1.1313e-08	1.09579e-07	9.35423	6.96027	not-sig	NMNAT3
0.33808	1.6297	5.99116	1.13343e-08	1.09724e-07	9.35241	6.9597	not-sig	OSGIN1
-0.349051	1.17549	-5.99056	1.13694e-08	1.10002e-07	9.34941	6.9586	not-sig	PLA2G4C
0.470243	2.03282	5.98955	1.14282e-08	1.10509e-07	9.34442	6.9566	not-sig	RIN1
0.717708	2.64471	5.98897	1.14621e-08	1.10775e-07	9.34155	6.95556	up	IER5L
-0.333792	0.128829	-5.98814	1.15106e-08	1.11181e-07	9.33746	6.95397	not-sig	CRHBP
-0.43352	0.682702	-5.9859	1.16435e-08	1.12402e-07	9.32634	6.94923	not-sig	SLC8A1
-0.189868	0.674398	-5.98578	1.16503e-08	1.12404e-07	9.32578	6.94922	not-sig	TCEANC
-0.940367	2.13579	-5.98413	1.17492e-08	1.13295e-07	9.31759	6.94579	down	NPTX2
0.872209	1.6909	5.98395	1.176e-08	1.13336e-07	9.3167	6.94563	up	POU5F1
-0.318981	1.23725	-5.98337	1.1795e-08	1.1361e-07	9.31382	6.94459	not-sig	CLCN5
-0.518239	5.26439	-5.98298	1.18182e-08	1.13769e-07	9.31192	6.94397	not-sig	SERINC1
0.863582	3.433	5.9825	1.18471e-08	1.13984e-07	9.30956	6.94316	up	MTMR11
-0.516244	1.23176	-5.98064	1.19607e-08	1.15012e-07	9.30032	6.93926	not-sig	KCND3
0.955766	1.38256	5.97876	1.2076e-08	1.16057e-07	9.29102	6.93533	up	ONECUT3
0.36128	0.534707	5.978	1.21228e-08	1.16441e-07	9.28728	6.9339	not-sig	ARHGAP8
-0.954311	3.54418	-5.9769	1.21914e-08	1.17035e-07	9.28182	6.93169	down	MAFB
-0.328013	1.68525	-5.97601	1.22465e-08	1.17498e-07	9.27745	6.92997	not-sig	ACADSB
0.422114	0.606109	5.9757	1.22663e-08	1.17623e-07	9.27588	6.92951	not-sig	KLHL30
-0.307268	0.21255	-5.97477	1.23246e-08	1.18116e-07	9.27129	6.92769	not-sig	SLC5A4
0.595562	2.30069	5.97289	1.24435e-08	1.19189e-07	9.262	6.92376	up	ECT2
0.220885	2.34062	5.97239	1.24749e-08	1.19424e-07	9.25955	6.92291	not-sig	COPS7B
0.758174	5.77848	5.97223	1.24852e-08	1.19455e-07	9.25876	6.92279	up	MDK
-0.341593	0.254169	-5.97141	1.25377e-08	1.19778e-07	9.25469	6.92162	not-sig	FAXC
-0.340308	0.587354	-5.97139	1.25387e-08	1.19778e-07	9.25462	6.92162	not-sig	SLC25A53
-0.399135	0.505957	-5.97138	1.25398e-08	1.19778e-07	9.25453	6.92162	not-sig	ASPA
-0.306717	2.07334	-5.96975	1.26442e-08	1.20662e-07	9.24651	6.91843	not-sig	BPTF
-0.39863	0.34001	-5.96972	1.26463e-08	1.20662e-07	9.24634	6.91843	not-sig	SCML4
0.526086	0.577089	5.96932	1.26722e-08	1.20842e-07	9.24437	6.91778	not-sig	HIST2H2BF
-0.286275	1.92433	-5.96718	1.28111e-08	1.22099e-07	9.23381	6.91329	not-sig	MED23
0.466799	2.51557	5.96474	1.29716e-08	1.2356e-07	9.22175	6.90812	not-sig	FBXL6
-0.440897	1.15318	-5.96392	1.30262e-08	1.24012e-07	9.21769	6.90654	not-sig	SMAD9
0.51758	1.45339	5.95985	1.32991e-08	1.2654e-07	9.19761	6.89777	not-sig	HOXA3
0.32376	3.67506	5.95536	1.3607e-08	1.29398e-07	9.17545	6.88807	not-sig	UBE2E3
-0.58233	2.38522	-5.9547	1.36528e-08	1.29762e-07	9.1722	6.88685	down	PREX1
0.517247	3.70282	5.953	1.37716e-08	1.3077e-07	9.16382	6.88349	not-sig	PSMB10
-0.177654	1.96043	-5.95296	1.37741e-08	1.3077e-07	9.16364	6.88349	not-sig	ARL14EP
0.456707	3.23933	5.95268	1.37938e-08	1.30885e-07	9.16225	6.88311	not-sig	SMURF1
1.8803	3.13553	5.95235	1.38172e-08	1.31035e-07	9.16061	6.88261	up	S100A2
0.599717	2.46316	5.9518	1.38561e-08	1.31332e-07	9.15789	6.88163	up	PTTG1
0.698132	2.57995	5.94935	1.40297e-08	1.32904e-07	9.14584	6.87646	up	MEGF6
0.776013	3.6416	5.94903	1.40524e-08	1.33046e-07	9.14427	6.876	up	CAVIN3
0.990842	4.97212	5.94492	1.43497e-08	1.35786e-07	9.12401	6.86715	up	CD55
-0.436988	0.822045	-5.94467	1.43684e-08	1.35888e-07	9.12275	6.86682	not-sig	CTTNBP2
-0.467218	0.978389	-5.9436	1.44464e-08	1.36551e-07	9.11751	6.86471	not-sig	PCDHB5
0.290265	3.56964	5.94267	1.4515e-08	1.37124e-07	9.11292	6.86289	not-sig	COA4
0.514621	1.9945	5.9419	1.45719e-08	1.37586e-07	9.10913	6.86143	not-sig	FGD6
0.356807	3.17832	5.9416	1.45945e-08	1.37706e-07	9.10763	6.86105	not-sig	TCF3
0.390685	2.67864	5.94151	1.46006e-08	1.37706e-07	9.10723	6.86105	not-sig	NMI
0.474062	0.80094	5.93991	1.47199e-08	1.38756e-07	9.09935	6.85775	not-sig	IRX5
-0.400725	0.762738	-5.93884	1.48006e-08	1.39391e-07	9.09405	6.85577	not-sig	ASB16
0.471215	2.36049	5.9388	1.48035e-08	1.39391e-07	9.09386	6.85577	not-sig	TPBG
0.462395	0.864179	5.93818	1.48506e-08	1.397e-07	9.09079	6.85481	not-sig	DRD4
0.695686	1.38463	5.93815	1.48525e-08	1.397e-07	9.09067	6.85481	up	MAPK15
-0.233763	2.00789	-5.93731	1.49163e-08	1.40223e-07	9.08652	6.85318	not-sig	MDC1
-0.193033	1.82014	-5.93673	1.49603e-08	1.4056e-07	9.08366	6.85214	not-sig	GFOD2
0.467741	3.24726	5.9355	1.5054e-08	1.41363e-07	9.07762	6.84966	not-sig	PAK1
-0.527369	1.86483	-5.93254	1.52822e-08	1.43428e-07	9.06306	6.84337	not-sig	ADGRL1
0.409768	3.16326	5.93179	1.5341e-08	1.43901e-07	9.05934	6.84194	not-sig	RPS6KA1
0.541572	5.34152	5.93006	1.54758e-08	1.45087e-07	9.05087	6.83837	not-sig	PFDN2
-0.651658	1.01491	-5.9288	1.55752e-08	1.45939e-07	9.04468	6.83583	down	ZBTB16
-0.319259	3.68809	-5.92813	1.5629e-08	1.46363e-07	9.04134	6.83457	not-sig	DDX24
0.295313	3.57343	5.92738	1.5688e-08	1.46836e-07	9.03769	6.83317	not-sig	RER1
-1.10792	1.99947	-5.92363	1.59897e-08	1.49578e-07	9.01926	6.82513	down	EDN3
-0.221669	1.78882	-5.92132	1.61784e-08	1.5113e-07	9.0079	6.82065	not-sig	GZF1
-0.317468	1.78506	-5.9213	1.61805e-08	1.5113e-07	9.00778	6.82065	not-sig	SOGA1
-0.584839	1.36295	-5.92128	1.61819e-08	1.5113e-07	9.00769	6.82065	down	TPPP
0.38044	3.8975	5.9197	1.63125e-08	1.52267e-07	8.99991	6.81739	not-sig	SNRPA
0.368289	2.78961	5.91946	1.63318e-08	1.52365e-07	8.99877	6.81712	not-sig	CASP4
-0.383006	0.732477	-5.91844	1.64165e-08	1.53073e-07	8.99376	6.8151	not-sig	SEMA6D
-0.247673	1.2631	-5.91818	1.64386e-08	1.53196e-07	8.99246	6.81475	not-sig	ZNF420
0.353349	4.49207	5.91805	1.64494e-08	1.53214e-07	8.99182	6.8147	not-sig	SMS
0.394086	3.55619	5.91775	1.64743e-08	1.53362e-07	8.99036	6.81428	not-sig	HSF1
-0.26398	1.55022	-5.9172	1.65202e-08	1.53707e-07	8.98766	6.81331	not-sig	LIN52
-0.226157	1.99638	-5.91697	1.654e-08	1.53807e-07	8.98651	6.81302	not-sig	PDSS2
0.441161	3.15771	5.91669	1.6563e-08	1.53938e-07	8.98516	6.81265	not-sig	TRAK1
-0.482372	1.12317	-5.91567	1.66494e-08	1.54658e-07	8.98013	6.81063	not-sig	MMP24
-0.4009	1.65081	-5.91477	1.67256e-08	1.55282e-07	8.97571	6.80888	not-sig	PTPRB
1.36265	5.17672	5.91397	1.67937e-08	1.5583e-07	8.97177	6.80735	up	WFDC2
0.61526	3.05031	5.912	1.6962e-08	1.57307e-07	8.96212	6.80325	up	SRD5A3
-0.240689	1.4926	-5.90948	1.71803e-08	1.59239e-07	8.94975	6.79795	not-sig	C3orf33
-0.568919	2.13334	-5.90938	1.71888e-08	1.59239e-07	8.94927	6.79795	not-sig	PTPRS
0.406434	2.13222	5.90916	1.72085e-08	1.59336e-07	8.94816	6.79769	not-sig	ACSF2
-0.325498	0.135406	-5.90897	1.72249e-08	1.59402e-07	8.94724	6.79751	not-sig	TNR
-0.665218	0.960331	-5.90757	1.73479e-08	1.60454e-07	8.94035	6.79465	down	KCNK17
-0.389743	3.25144	-5.90646	1.7445e-08	1.61265e-07	8.93495	6.79246	not-sig	ATP6V1B2
-0.200271	1.86929	-5.90597	1.74886e-08	1.61582e-07	8.93253	6.79161	not-sig	POLR3F
0.429636	1.18945	5.90395	1.76691e-08	1.63162e-07	8.9226	6.78738	not-sig	KIF18B
-0.258777	2.3424	-5.90336	1.77217e-08	1.6356e-07	8.91972	6.78632	not-sig	SAYSD1
-0.374839	0.263967	-5.90263	1.77868e-08	1.64072e-07	8.91617	6.78496	not-sig	RYR2
0.321239	1.07122	5.90253	1.77962e-08	1.64072e-07	8.91566	6.78496	not-sig	ACOT11
-0.260043	1.78298	-5.89997	1.80282e-08	1.66122e-07	8.90312	6.77957	not-sig	ATG4C
0.483436	2.86933	5.89971	1.80522e-08	1.66254e-07	8.90184	6.77923	not-sig	DTX4
0.625512	1.66058	5.89869	1.81463e-08	1.67031e-07	8.89681	6.7772	up	ADAMTS14
0.585926	2.49751	5.89659	1.83398e-08	1.68722e-07	8.88654	6.77283	up	ESRP2
-0.235007	2.48113	-5.89575	1.8418e-08	1.69351e-07	8.88243	6.77121	not-sig	RNF41
0.297956	2.67035	5.89548	1.84433e-08	1.69493e-07	8.8811	6.77085	not-sig	FAM222B
0.423231	1.73702	5.89435	1.85494e-08	1.70377e-07	8.87555	6.76859	not-sig	KIF11
-0.224767	1.0616	-5.89369	1.86114e-08	1.70855e-07	8.87232	6.76737	not-sig	ZNF554
1.80408	6.85079	5.89239	1.87339e-08	1.71889e-07	8.86597	6.76475	up	MMP7
-0.391098	2.47031	-5.89181	1.87894e-08	1.72306e-07	8.8631	6.7637	not-sig	LYSMD2
0.95631	2.22559	5.89144	1.88246e-08	1.72538e-07	8.86129	6.76312	up	PLPP4
0.362171	3.157	5.89004	1.89582e-08	1.73669e-07	8.85445	6.76028	not-sig	TMEM63B
-0.218295	1.54317	-5.8895	1.90099e-08	1.7405e-07	8.85182	6.75933	not-sig	FBXO25
-0.361601	0.961137	-5.88722	1.92305e-08	1.75977e-07	8.84065	6.75454	not-sig	MAGI2
0.530626	1.92052	5.88707	1.92452e-08	1.76017e-07	8.83992	6.75445	not-sig	KIFC1
-0.291844	2.77683	-5.88652	1.92991e-08	1.76417e-07	8.83721	6.75346	not-sig	RANBP2
0.456421	2.54342	5.88618	1.93315e-08	1.76619e-07	8.83558	6.75296	not-sig	CNNM4
-0.658375	0.576491	-5.88484	1.94636e-08	1.77732e-07	8.82899	6.75023	down	ASPDH
-0.243481	1.70541	-5.88469	1.94783e-08	1.77772e-07	8.82826	6.75014	not-sig	IFT74
-0.239989	0.087603	-5.88346	1.95994e-08	1.78782e-07	8.82227	6.74768	not-sig	CCDC158
-0.478198	0.577418	-5.88332	1.96139e-08	1.7882e-07	8.82155	6.74758	not-sig	LMO3
-0.199706	1.6787	-5.88187	1.97581e-08	1.79953e-07	8.81446	6.74484	not-sig	BRAF
-0.341691	1.85215	-5.88186	1.97591e-08	1.79953e-07	8.81441	6.74484	not-sig	RUFY3
-0.434278	0.398291	-5.87993	1.99524e-08	1.81618e-07	8.80499	6.74084	not-sig	KCNA3
0.579842	5.81507	5.87894	2.00531e-08	1.82438e-07	8.80012	6.73888	not-sig	TPM4
0.670835	2.18508	5.87869	2.0078e-08	1.82568e-07	8.79892	6.73858	up	ANO9
-0.509262	1.83434	-5.87832	2.01159e-08	1.82816e-07	8.7971	6.73799	not-sig	CASTOR3
-0.308459	2.71948	-5.87789	2.01595e-08	1.83116e-07	8.795	6.73727	not-sig	PSKH1
-0.38871	3.39893	-5.87636	2.03159e-08	1.84439e-07	8.78753	6.73415	not-sig	SEC23B
0.631082	0.86639	5.87601	2.03518e-08	1.84668e-07	8.78582	6.73361	up	LHB
0.400142	2.70302	5.8757	2.03834e-08	1.84857e-07	8.78432	6.73316	not-sig	DTYMK
-0.872857	1.62668	-5.87548	2.0406e-08	1.84964e-07	8.78325	6.73291	down	AOX1
0.246339	1.81443	5.87174	2.07956e-08	1.88396e-07	8.76495	6.72493	not-sig	ZNRF1
0.548634	3.76383	5.87143	2.08277e-08	1.88588e-07	8.76345	6.72449	not-sig	EBP
0.487296	1.3585	5.87102	2.08716e-08	1.88886e-07	8.76142	6.7238	not-sig	CDC45
-0.225527	2.31754	-5.87042	2.09346e-08	1.89357e-07	8.7585	6.72272	not-sig	RIOK1
0.356964	1.0907	5.86926	2.10579e-08	1.90372e-07	8.75282	6.7204	not-sig	CYB5R2
-0.230834	2.12768	-5.86758	2.1237e-08	1.91862e-07	8.74462	6.71701	not-sig	YLPM1
-0.280613	1.49051	-5.8675	2.1245e-08	1.91862e-07	8.74426	6.71701	not-sig	MDN1
0.412346	4.34695	5.8642	2.1602e-08	1.94902e-07	8.72814	6.71018	not-sig	PRR13
0.377075	0.927927	5.86418	2.16043e-08	1.94902e-07	8.72804	6.71018	not-sig	CKAP2L
-0.220732	0.0611066	-5.86008	2.20563e-08	1.98877e-07	8.708	6.70142	not-sig	MYT1L
-0.510657	1.08229	-5.8591	2.21654e-08	1.99756e-07	8.70323	6.6995	not-sig	C21orf58
-0.232384	1.15816	-5.85756	2.23385e-08	2.0121e-07	8.69571	6.69635	not-sig	C15orf61
-0.422395	2.41794	-5.85731	2.23665e-08	2.01357e-07	8.6945	6.69603	not-sig	BTBD3
-0.363254	2.11727	-5.85672	2.24335e-08	2.01854e-07	8.6916	6.69496	not-sig	RCAN3
-0.253474	1.44955	-5.85651	2.2457e-08	2.0196e-07	8.69059	6.69473	not-sig	DNAL1
-0.259393	0.943682	-5.85463	2.26706e-08	2.03775e-07	8.68143	6.69085	not-sig	ARSG
-0.184669	1.2492	-5.85406	2.27356e-08	2.04253e-07	8.67866	6.68983	not-sig	ZNF324
-0.334068	0.134619	-5.84904	2.33182e-08	2.09378e-07	8.65418	6.67907	not-sig	SMIM18
1.03142	5.07733	5.84274	2.40695e-08	2.16011e-07	8.62351	6.66552	up	HIST1H1C
-0.757941	1.24144	-5.84234	2.41189e-08	2.1626e-07	8.62153	6.66502	down	EFNB3
-0.473584	1.29453	-5.84231	2.41223e-08	2.1626e-07	8.62139	6.66502	not-sig	CACNA2D1
-0.295084	2.67451	-5.84071	2.43174e-08	2.17895e-07	8.6136	6.66175	not-sig	PEX5
0.833138	1.22891	5.83995	2.44102e-08	2.18568e-07	8.60992	6.66041	up	NR1I2
-1.55141	4.47493	-5.83989	2.44179e-08	2.18568e-07	8.60961	6.66041	down	C7
-0.596873	0.995738	-5.83681	2.47993e-08	2.21867e-07	8.59462	6.65391	down	ABCA8
0.496172	1.69657	5.83591	2.49113e-08	2.22753e-07	8.59026	6.65218	not-sig	RAB38
-0.434676	3.01518	-5.83306	2.52716e-08	2.25857e-07	8.57637	6.64617	not-sig	MXD4
-0.427561	1.40715	-5.83059	2.55869e-08	2.28557e-07	8.56438	6.64101	not-sig	SERP2
-0.398784	3.13172	-5.82577	2.62147e-08	2.34043e-07	8.54094	6.6307	not-sig	NISCH
-0.199877	1.45484	-5.82481	2.63415e-08	2.35054e-07	8.53627	6.62883	not-sig	VPS33A
-0.297871	1.87874	-5.8247	2.63562e-08	2.35063e-07	8.53573	6.62882	not-sig	CEP120
-0.434311	1.24031	-5.8232	2.6555e-08	2.36713e-07	8.52846	6.62578	not-sig	EBF1
0.512262	2.53772	5.82027	2.69496e-08	2.40107e-07	8.5142	6.6196	not-sig	CNKSR1
0.397806	1.70065	5.81799	2.726e-08	2.42747e-07	8.50312	6.61485	not-sig	RDH13
0.739694	2.56373	5.8155	2.76025e-08	2.45669e-07	8.49105	6.60965	up	HES4
0.929021	4.12842	5.81522	2.76414e-08	2.45889e-07	8.48968	6.60926	up	CDC42EP5
-0.344756	2.82307	-5.81411	2.7796e-08	2.47136e-07	8.48429	6.60706	not-sig	IER3IP1
0.397452	1.33051	5.81346	2.78869e-08	2.47817e-07	8.48113	6.60587	not-sig	BUB1B
-0.289533	0.226265	-5.81102	2.82307e-08	2.50742e-07	8.46928	6.60077	not-sig	ACSM5
0.470094	3.5442	5.81005	2.83679e-08	2.51831e-07	8.4646	6.59889	not-sig	PNKD
0.564127	2.79691	5.8089	2.85315e-08	2.53152e-07	8.45904	6.59662	not-sig	TGFB1I1
-0.374227	0.315556	-5.80852	2.85872e-08	2.53516e-07	8.45715	6.59599	not-sig	GRIK3
-0.56467	2.39908	-5.80824	2.86268e-08	2.53737e-07	8.45581	6.59562	not-sig	GNAI1
-0.331107	1.05169	-5.80735	2.87549e-08	2.54741e-07	8.45149	6.5939	not-sig	ZNF132
0.198086	3.01217	5.80697	2.88103e-08	2.55101e-07	8.44963	6.59329	not-sig	UBE2I
0.944659	1.46111	5.80488	2.91132e-08	2.57651e-07	8.43952	6.58897	up	MUC4
-0.456051	1.00928	-5.8044	2.91832e-08	2.58137e-07	8.4372	6.58815	not-sig	GPM6B
0.35423	2.45824	5.80274	2.94273e-08	2.60163e-07	8.42914	6.58475	not-sig	TMEM62
-0.31852	4.05539	-5.80218	2.95104e-08	2.60764e-07	8.42641	6.58375	not-sig	NARS
-0.369343	1.83747	-5.80149	2.96119e-08	2.61419e-07	8.42309	6.58266	not-sig	MAST3
0.386956	2.87565	5.80147	2.96149e-08	2.61419e-07	8.423	6.58266	not-sig	RTKN
-0.360077	1.43229	-5.80109	2.96714e-08	2.61783e-07	8.42115	6.58206	not-sig	MCF2L
-0.402423	0.231965	-5.80098	2.96876e-08	2.61792e-07	8.42062	6.58204	not-sig	TCEAL6
0.242146	3.2905	5.80081	2.97126e-08	2.61878e-07	8.41981	6.5819	not-sig	DEDD
-0.382612	0.592517	-5.79769	3.01814e-08	2.65874e-07	8.40467	6.57532	not-sig	ZNF366
-0.336214	2.213	-5.79747	3.02142e-08	2.66027e-07	8.40363	6.57507	not-sig	MAN2A2
0.330875	3.53624	5.79706	3.02768e-08	2.66442e-07	8.40162	6.5744	not-sig	FPGS
-0.38923	1.08204	-5.79593	3.04482e-08	2.67814e-07	8.39616	6.57217	not-sig	EID2B
-0.356974	0.236335	-5.79458	3.06552e-08	2.69497e-07	8.38961	6.56945	not-sig	ACVR1C
-0.281423	0.365337	-5.79408	3.0732e-08	2.70034e-07	8.38719	6.56858	not-sig	ZNF658
-0.304318	0.118594	-5.7935	3.08212e-08	2.7068e-07	8.38439	6.56754	not-sig	TSPEAR
0.525096	2.1717	5.79334	3.0846e-08	2.70759e-07	8.38362	6.56742	not-sig	PLEKHA7
0.347576	4.97455	5.79285	3.09216e-08	2.71284e-07	8.38125	6.56658	not-sig	AUP1
-0.273087	0.564073	-5.79191	3.10675e-08	2.72426e-07	8.3767	6.56475	not-sig	DNAJC28
0.2714	3.00928	5.79076	3.12481e-08	2.7387e-07	8.37109	6.56246	not-sig	ACTL6A
-0.248821	2.53402	-5.78891	3.15376e-08	2.76267e-07	8.36218	6.55867	not-sig	IPO13
-0.244064	2.28256	-5.7883	3.16338e-08	2.76968e-07	8.35923	6.55757	not-sig	TSR1
-0.364306	0.140954	-5.78796	3.16881e-08	2.77303e-07	8.35757	6.55705	not-sig	ZSCAN1
0.865261	1.57549	5.78694	3.18504e-08	2.78582e-07	8.35263	6.55505	up	TRIM54
0.288607	3.25137	5.78604	3.19941e-08	2.79696e-07	8.34828	6.55331	not-sig	ZBTB7A
-0.246887	2.06205	-5.78552	3.20774e-08	2.80282e-07	8.34577	6.5524	not-sig	CNST
-0.365111	2.64146	-5.78452	3.22382e-08	2.81545e-07	8.34093	6.55045	not-sig	FAM8A1
0.632086	4.32562	5.78366	3.2377e-08	2.82613e-07	8.33678	6.54881	up	PFKP
0.316209	2.91356	5.78181	3.26782e-08	2.85099e-07	8.32783	6.545	not-sig	DDA1
0.279534	3.53003	5.77935	3.30832e-08	2.88381e-07	8.31592	6.54003	not-sig	OTUB1
-0.511571	1.27122	-5.77932	3.3088e-08	2.88381e-07	8.31578	6.54003	not-sig	ZMAT1
0.486492	4.72809	5.774	3.39795e-08	2.96001e-07	8.29008	6.52871	not-sig	CTNND1
0.601509	1.12758	5.77386	3.40044e-08	2.96069e-07	8.28937	6.52861	up	HPDL
0.546535	3.47144	5.77226	3.42766e-08	2.98288e-07	8.28166	6.52536	not-sig	TUBA1C
0.386699	9.27952	5.77151	3.44057e-08	2.9926e-07	8.27803	6.52395	not-sig	ACTG1
-0.440278	1.50868	-5.77091	3.4508e-08	2.99998e-07	8.27516	6.52288	not-sig	ERG
-0.233975	1.76314	-5.77043	3.45918e-08	3.00575e-07	8.27281	6.52205	not-sig	TOP3A
-0.205687	1.01927	-5.76985	3.46923e-08	3.01296e-07	8.27001	6.52101	not-sig	ZNF407
0.461647	2.29827	5.76944	3.47631e-08	3.01759e-07	8.26804	6.52034	not-sig	IRS1
0.42026	2.51689	5.76927	3.47918e-08	3.01856e-07	8.26724	6.5202	not-sig	DUSP7
-0.401154	1.70818	-5.76881	3.48722e-08	3.0228e-07	8.26501	6.51959	not-sig	TBC1D14
-0.264434	0.207097	-5.76879	3.48757e-08	3.0228e-07	8.26491	6.51959	not-sig	NAALAD2
-0.567704	0.551811	-5.76388	3.57414e-08	3.09627e-07	8.24121	6.50916	not-sig	PRPH
-0.275207	1.17207	-5.76288	3.59197e-08	3.11015e-07	8.2364	6.50722	not-sig	SGK3
-0.544472	0.495083	-5.76277	3.59402e-08	3.11035e-07	8.23585	6.50719	not-sig	NPHS1
0.804889	3.11381	5.76267	3.59582e-08	3.11035e-07	8.23536	6.50719	up	AMIGO2
1.93398	7.04198	5.76108	3.62444e-08	3.13354e-07	8.2277	6.50397	up	CEACAM6
-0.19298	1.07709	-5.75854	3.67066e-08	3.17191e-07	8.21545	6.49868	not-sig	ZNF268
-0.770685	2.91086	-5.75802	3.68028e-08	3.17863e-07	8.21292	6.49776	down	PEMT
-0.346845	0.10846	-5.75582	3.72073e-08	3.21195e-07	8.20236	6.49323	not-sig	GPR148
0.782111	3.84728	5.75514	3.73336e-08	3.22124e-07	8.19908	6.49198	up	F2RL1
-0.383279	1.08342	-5.75365	3.76132e-08	3.24374e-07	8.19187	6.48895	not-sig	TRAM1L1
-0.259349	0.928934	-5.75237	3.78531e-08	3.26279e-07	8.18572	6.48641	not-sig	MBLAC2
-0.992816	1.44036	-5.75195	3.79331e-08	3.26785e-07	8.18368	6.48574	down	PTX3
[truncated: 15,223 more rows]

## Sheet: Table S7
ID	StromalScore	ImmuneScore	ESTIMATEScore	TumorPurity
TCGA-FB-AAPS-01A-12R-A39D-07	1997.83	1359.3	3357.13	0.455578
TCGA-FB-AAQ3-01A-11R-A41B-07	630.521	379.351	1009.87	0.729487
TCGA-IB-AAUU-01A-11R-A37L-07	430.29	470.737	901.027	0.740322
TCGA-H6-A45N-11A-12R-A26U-07	590.566	3303.89	3894.46	0.384022
TCGA-OE-A75W-01A-12R-A32O-07	589.326	586.482	1175.81	0.712612
TCGA-3A-A9IO-01A-11R-A38C-07	-945.338	-1297.26	-2242.6	0.962208
TCGA-IB-AAUM-01A-11R-A37L-07	425.466	251.209	676.675	0.762055
TCGA-IB-7649-01A-11R-2156-07	1392.51	1209.54	2602.05	0.551247
TCGA-IB-A7LX-01A-12R-A36G-07	-168.343	-497.724	-666.067	0.8741
TCGA-HZ-8317-01A-11R-2404-07	999.095	-100.431	898.664	0.740555
TCGA-3A-A9IH-01A-12R-A39D-07	181.798	-195.32	-13.5226	0.823637
TCGA-IB-A6UG-01A-32R-A33R-07	-176.281	-31.5798	-207.861	0.839477
TCGA-3A-A9J0-01A-11R-A41B-07	790.28	67.5427	857.823	0.74457
TCGA-XD-AAUG-01A-61R-A41B-07	1745.64	288.715	2034.35	0.618781
TCGA-2J-AABV-01A-12R-A41B-07	-120.026	-45.9522	-165.978	0.836121
TCGA-HZ-7926-01A-11R-2156-07	294.943	255.12	550.063	0.773957
TCGA-2J-AAB8-01A-12R-A41B-07	1077.08	-22.1115	1054.97	0.724943
TCGA-YB-A89D-11A-11R-A36G-07	1860.09	1536.6	3396.69	0.450401
TCGA-XN-A8T5-01A-12R-A36G-07	1325.48	1362.87	2688.35	0.540634
TCGA-HZ-A9TJ-06A-11R-A41B-07	-527.318	-383.789	-911.107	0.891003
TCGA-IB-7645-01A-22R-2204-07	1941.83	1547.18	3489.01	0.438261
TCGA-3A-A9IL-01A-11R-A38C-07	-40.6125	-845.207	-885.819	0.889311
TCGA-IB-A5SO-01A-11R-A32O-07	1545.47	898.636	2444.11	0.570441
TCGA-3A-A9I5-01A-11R-A38C-07	62.5712	-201.873	-139.301	0.833966
TCGA-2L-AAQA-01A-21R-A38C-07	47.2121	-307.563	-260.351	0.843639
TCGA-F2-7276-01A-11R-2156-07	1398.6	1102.71	2501.31	0.563524
TCGA-RB-A7B8-01A-12R-A33R-07	1203.95	644.01	1847.96	0.640039
TCGA-2J-AAB9-01A-11R-A41B-07	923.667	336.296	1259.96	0.703891
TCGA-IB-7646-01A-11R-2156-07	1480.94	806.787	2287.73	0.589142
TCGA-HV-A5A3-01A-11R-A26U-07	-91.3587	-194.613	-285.972	0.845652
TCGA-HZ-7920-01A-11R-2204-07	1312.2	974.127	2286.33	0.589309
TCGA-IB-7654-01A-11R-2156-07	1130.54	-137.755	992.787	0.7312
TCGA-HV-A5A6-01A-11R-A26U-07	259.967	-351.395	-91.4278	0.830068
TCGA-2J-AABP-01A-11R-A41B-07	1710.43	1499.58	3210.02	0.474693
TCGA-IB-7891-01A-11R-2204-07	1571.49	1168.78	2740.26	0.534208
TCGA-3A-A9IS-01A-21R-A39D-07	-1517.63	-1609.3	-3126.93	0.989362
TCGA-IB-AAUT-01A-11R-A37L-07	1212.39	1180.07	2392.46	0.576651
TCGA-XD-AAUI-01A-42R-A41B-07	609.116	528.406	1137.52	0.716543
TCGA-IB-8127-01A-11R-2404-07	1033.08	607.429	1640.51	0.663137
TCGA-FB-AAPY-01A-11R-A41B-07	806.583	1193.71	2000.29	0.622701
TCGA-IB-A5ST-01A-11R-A32O-07	1550.36	1800.55	3350.91	0.456391
TCGA-IB-AAUP-01A-11R-A37L-07	1499.09	2098.64	3597.73	0.423861
TCGA-IB-A5SS-01A-11R-A32O-07	1372.65	533.697	1906.35	0.633431
TCGA-3A-A9IJ-01A-11R-A39D-07	-857.992	-1481.71	-2339.7	0.965991
TCGA-3A-A9IR-01A-11R-A38C-07	-1181.37	-1268.27	-2449.63	0.970038
TCGA-HZ-A4BH-01A-11R-A26U-07	1064.14	864.909	1929.04	0.63085
TCGA-LB-A9Q5-01A-11R-A39D-07	953.914	833.002	1786.92	0.646899
TCGA-2L-AAQE-01A-11R-A39D-07	191.53	-49.0845	142.445	0.810438
TCGA-Q3-AA2A-01A-11R-A37L-07	191.163	213.628	404.791	0.787283
TCGA-FB-AAQ6-01A-11R-A41B-07	-145.597	-416.979	-562.576	0.86662
TCGA-M8-A5N4-01A-11R-A26U-07	893.823	697.418	1591.24	0.668532
TCGA-H6-8124-01A-11R-2404-07	334.554	-523.663	-189.109	0.837978
TCGA-IB-A5SQ-01A-11R-A32O-07	1403.81	694.001	2097.81	0.611437
TCGA-IB-7652-01A-11R-2156-07	1230.76	837.318	2068.08	0.614884
TCGA-HZ-8315-01A-11R-2404-07	1317.5	675.846	1993.35	0.623498
TCGA-HV-A7OL-01A-11R-A33R-07	342.046	1305.09	1647.14	0.662408
TCGA-HZ-A49G-01A-11R-A26U-07	1334.71	1162.2	2496.91	0.564058
TCGA-2J-AAB6-01A-11R-A41B-07	790.099	75.3712	865.47	0.74382
TCGA-HZ-A8P1-01A-11R-A37L-07	-260.888	-511.947	-772.835	0.881605
TCGA-3A-A9I9-01A-11R-A38C-07	479.482	343.243	822.725	0.747999
TCGA-HZ-8519-01A-11R-2404-07	1199.55	521.382	1720.93	0.654254
TCGA-FB-AAPZ-01A-11R-A41B-07	605.877	617.881	1223.76	0.707656
TCGA-2J-AABK-01A-31R-A41B-07	-639.812	-373.383	-1013.19	0.897706
TCGA-HV-A7OP-01A-11R-A33R-07	-1489.07	-451.445	-1940.51	0.94919
TCGA-HV-AA8X-01A-11R-A39D-07	-330.431	-584.785	-915.216	0.891276
TCGA-US-A779-01A-11R-A32O-07	-804.646	-630.872	-1435.52	0.923277
TCGA-3A-A9IN-01A-11R-A39D-07	422.291	-740.935	-318.645	0.848203
TCGA-F2-7273-01A-11R-2156-07	1757.29	1219.87	2977.16	0.504494
TCGA-HZ-8003-01A-21R-2204-07	1534.77	1377.14	2911.9	0.512742
TCGA-3A-A9IC-01A-11R-A38C-07	1157.79	183.75	1341.54	0.695335
TCGA-IB-8126-01A-11R-2404-07	1290.86	1114.89	2405.75	0.575056
TCGA-2J-AAB4-01A-12R-A41B-07	291.596	415.884	707.48	0.759119
TCGA-HZ-8638-01A-11R-2404-07	-12.17	-82.3893	-94.5593	0.830324
TCGA-IB-AAUN-01A-12R-A38C-07	413.373	-149.595	263.778	0.799877
TCGA-US-A774-01A-21R-A32O-07	1258.86	681.365	1940.23	0.629575
TCGA-IB-AAUS-01A-12R-A38C-07	2195.51	2024.19	4219.7	0.339519
TCGA-IB-7651-01A-11R-2156-07	1284.26	916.124	2200.38	0.599454
TCGA-2J-AAB1-01A-11R-A41B-07	488.481	453.649	942.13	0.736252
TCGA-3E-AAAY-01A-11R-A38C-07	1149.22	1010.35	2159.57	0.604238
TCGA-IB-7893-01A-11R-2204-07	1944.16	369.932	2314.09	0.586011
TCGA-2L-AAQL-01A-11R-A38C-07	665.797	518.591	1184.39	0.711728
TCGA-LB-A7SX-01A-11R-A33R-07	-527.674	-393.078	-920.752	0.891645
TCGA-IB-7887-01A-11R-2156-07	885.197	90.7369	975.934	0.732885
TCGA-HZ-8002-01A-11R-2204-07	1574.32	802.984	2377.3	0.578467
TCGA-FB-AAQ2-01A-31R-A41B-07	-388.598	-625.223	-1013.82	0.897746
TCGA-3A-A9IX-01A-11R-A41B-07	1291.4	1177.54	2468.94	0.567444
TCGA-F2-A8YN-01A-11R-A37L-07	535.829	63.892	599.721	0.769321
TCGA-HV-AA8V-01A-11R-A41B-07	1424.22	307.746	1731.96	0.653029
TCGA-L1-A7W4-01A-12R-A36G-07	133.757	-637.627	-503.87	0.862288
TCGA-YH-A8SY-01A-11R-A37L-07	1299.4	167.156	1466.55	0.682031
TCGA-IB-7889-01A-11R-2156-07	941.592	1232.6	2174.19	0.602526
TCGA-US-A776-01A-13R-A33R-07	-1073.2	-907.161	-1980.36	0.951015
TCGA-LB-A8F3-01A-11R-A36G-07	-59.2815	-327.355	-386.636	0.853447
TCGA-H8-A6C1-01A-11R-A32O-07	439.158	377.218	816.375	0.748618
TCGA-F2-A7TX-01A-33R-A38C-07	518.486	873.647	1392.13	0.689979
TCGA-IB-A7M4-01A-11R-A36G-07	53.2576	271.678	324.936	0.794457
TCGA-3A-A9IZ-01A-12R-A41B-07	-6.03668	-292.302	-298.339	0.84662
TCGA-HZ-7919-01A-11R-2156-07	742.64	246.781	989.421	0.731537
TCGA-US-A77G-01A-11R-A32O-07	-848.668	-446.668	-1295.34	0.915178
TCGA-2J-AABF-01A-31R-A41B-07	1004.61	1100.79	2105.41	0.610554
TCGA-HZ-7924-01A-11R-2156-07	108.507	172.176	280.683	0.798385
TCGA-Z5-AAPL-01A-12R-A41B-07	747.456	2702.64	3450.1	0.443388
TCGA-HZ-A77Q-01A-11R-A36G-07	1907.83	1418.96	3326.79	0.459539
TCGA-FB-A545-01A-11R-A26U-07	29.6331	-887.319	-857.686	0.887415
TCGA-FB-AAPQ-01A-11R-A41B-07	83.5618	-238.921	-155.359	0.835265
TCGA-2J-AABR-01A-11R-A41B-07	992.432	1090.44	2082.87	0.613171
TCGA-RB-AA9M-01A-11R-A39D-07	408.419	-268.124	140.295	0.810623
TCGA-3A-A9IU-01A-11R-A39D-07	440.211	-175.593	264.619	0.799803
TCGA-HZ-8637-01A-11R-2404-07	1459.47	2307.56	3767.03	0.401224
TCGA-3A-A9I7-01A-21R-A38C-07	899.895	518.829	1418.72	0.687149
TCGA-FB-AAPU-01A-31R-A41B-07	-712.284	-441.497	-1153.78	0.906606
TCGA-IB-7888-01A-11R-2156-07	1799.1	1514.99	3314.09	0.461192
TCGA-S4-A8RM-01A-11R-A37L-07	-211.782	79.488	-132.294	0.833398
TCGA-IB-7885-01A-11R-2156-07	1444.87	969.959	2414.83	0.573965
TCGA-FB-A78T-01A-12R-A32O-07	32.0426	387.871	419.914	0.785913
TCGA-2L-AAQI-01A-12R-A39D-07	177.008	-239.863	-62.8545	0.827722
TCGA-YY-A8LH-01A-11R-A36G-07	-926.523	-405.731	-1332.25	0.917349
TCGA-FB-AAQ1-01A-12R-A41B-07	203.081	268.88	471.962	0.781166
TCGA-FB-AAPP-01A-12R-A41B-07	-1610.92	-1042.53	-2653.45	0.976871
TCGA-HZ-8001-01A-11R-2204-07	1812.6	1365.9	3178.49	0.478762
TCGA-IB-A5SP-01A-11R-A32O-07	-446.044	-95.0015	-541.046	0.865039
TCGA-HZ-7289-01A-11R-2156-07	-1073.86	-834.366	-1908.23	0.947689
TCGA-FB-A5VM-01A-11R-A32O-07	794.809	993.38	1788.19	0.646756
TCGA-XD-AAUH-01A-42R-A41B-07	1196.15	1204.48	2400.63	0.575671
TCGA-HZ-7923-01A-12R-2156-07	1923.4	1612.17	3535.57	0.432108
TCGA-IB-AAUW-01A-12R-A38C-07	818.76	477.889	1296.65	0.700056
TCGA-3A-A9IV-01A-11R-A41B-07	140.65	-1241.72	-1101.07	0.903314
TCGA-IB-AAUQ-01A-22R-A41I-07	910.511	-67.0832	843.427	0.745979
TCGA-2J-AABT-01A-11R-A41B-07	1209.4	805.203	2014.6	0.621056
TCGA-F2-A44G-01A-11R-A26U-07	655.04	197.308	852.348	0.745106
TCGA-2J-AABO-01A-21R-A41B-07	658.238	-178.779	479.459	0.780478
TCGA-IB-7897-01A-21R-2204-07	1765.11	1257.93	3023.04	0.498669
TCGA-HZ-7922-01A-11R-2156-07	1417.86	395.325	1813.19	0.643953
TCGA-HV-A5A5-01A-11R-A26U-07	825.53	591.384	1416.91	0.687342
TCGA-HZ-8005-01A-11R-2204-07	1174.63	402.061	1576.69	0.670119
TCGA-FB-A7DR-01A-21R-A33R-07	1245.24	293.482	1538.73	0.674245
TCGA-FB-A4P5-01A-11R-A26U-07	1441.51	1741.67	3183.18	0.478157
TCGA-IB-A6UF-01A-23R-A33R-07	-26.8098	-267.695	-294.505	0.84632
TCGA-2L-AAQM-01A-11R-A39D-07	-533.985	-986.92	-1520.9	0.928019
TCGA-IB-7886-01A-11R-2156-07	1199.3	453.134	1652.44	0.661825
TCGA-HZ-A4BK-01A-11R-A26U-07	563.151	769.836	1332.99	0.696237
TCGA-3E-AAAZ-01A-11R-A38C-07	631.475	-398.941	232.534	0.802621
TCGA-IB-AAUR-01A-21R-A38C-07	1519.57	2364.96	3884.53	0.385367
TCGA-2J-AABA-01A-21R-A41B-07	834.662	-28.8583	805.803	0.749646
TCGA-2J-AABU-01A-11R-A41B-07	605.801	53.8968	659.697	0.763666
TCGA-F2-6880-01A-11R-2156-07	-609.852	-978.395	-1588.25	0.931656
TCGA-IB-AAUO-01A-12R-A38C-07	52.1165	286.942	339.059	0.793196
TCGA-2J-AABI-01A-12R-A41B-07	322.281	613.521	935.802	0.736881
TCGA-2J-AABE-01A-12R-A41B-07	877.958	387.591	1265.55	0.703309
TCGA-FB-A4P6-01A-12R-A26U-07	748.013	546.015	1294.03	0.700331
TCGA-HZ-A8P0-01A-11R-A36G-07	640.358	-94.0293	546.329	0.774304
TCGA-S4-A8RP-01A-11R-A36G-07	829.166	302.632	1131.8	0.717129
TCGA-XD-AAUL-01A-21R-A39D-07	931.612	472.495	1404.11	0.688706
TCGA-HZ-A77P-01A-11R-A33R-07	1262.1	369.019	1631.12	0.664167
TCGA-US-A77J-01A-11R-A32O-07	1349.21	2073.93	3423.15	0.44693
TCGA-2L-AAQJ-01A-12R-A39D-07	357.974	396.785	754.759	0.754584
TCGA-HV-A5A4-01A-11R-A26U-07	772.321	136.747	909.069	0.739528
TCGA-US-A77E-01A-11R-A32O-07	635.38	-223.368	412.012	0.786629
TCGA-IB-7644-01A-11R-2156-07	668.789	56.7404	725.53	0.757392
TCGA-HZ-A49I-01A-12R-A26U-07	746.503	998.152	1744.66	0.651617
TCGA-S4-A8RO-01A-12R-A37L-07	162.803	156.343	319.146	0.794972
TCGA-F2-A44H-01A-11R-A26U-07	1519.21	870.355	2389.56	0.576998
TCGA-IB-7890-01A-12R-2204-07	1728.82	354.641	2083.46	0.613102
TCGA-HZ-A77O-01A-11R-A33R-07	199.956	-13.6391	186.317	0.806649
TCGA-HZ-8636-01A-21R-2404-07	1334.41	626.112	1960.53	0.627257
TCGA-3A-A9IB-01A-21R-A39D-07	1190.71	399.32	1590.03	0.668664
TCGA-2J-AABH-01A-21R-A41B-07	257.218	102.227	359.445	0.79137
TCGA-RL-AAAS-01A-32R-A39D-07	1372.66	1333.75	2706.41	0.538402
TCGA-XN-A8T3-01A-11R-A36G-07	848.82	205.488	1054.31	0.72501
TCGA-FB-AAQ0-01A-31R-A41B-07	-299.895	-626.74	-926.635	0.892035
TCGA-HZ-7925-01A-11R-2156-07	1880.43	426.386	2306.82	0.586876
TCGA-Q3-A5QY-01A-12R-A32O-07	1400.21	2719.39	4119.6	0.353303
TCGA-IB-AAUV-01A-11R-A38C-07	2147.99	1370.14	3518.12	0.434416
TCGA-HZ-A49H-01A-11R-A26U-07	1298.95	1190.18	2489.13	0.565
TCGA-PZ-A5RE-01A-11R-A32O-07	930.326	810.778	1741.1	0.652012
TCGA-HZ-7918-01A-11R-2156-07	1580.35	1633.14	3213.49	0.474245
TCGA-F2-6879-01A-11R-2156-07	690.39	-82.3866	608.003	0.768543

## Sheet: Table S8
	Table S8. The feature genes for each mechanism/pathway.
	Gene Signatures	Genes	Sources
	EMT-1	CLDN3, CLDN7, CLDN4, CDH1, VIM, TWIST1, ZEB1, ZEB2	PMID: 24520177
	EMT2	AXL, FAP, LOXL2, ROR2, TAGLN, TWIST2, WNT5A	PMID: 26997480
	EMT3	FOXF1, GATA6, SOX9, TWIST1, ZEB1, ZEB2	PMID: 27321955
	Pan-F-TBRS	ACTA2, ACTG2, ADAM12, ADAM19, CNN1, COL4A1, CTGF, CTPS1, FAM101B, FSTL3, HSPB1, IGFBP3, PXDC1, SEMA7A, SH3PXD2A, TAGLN, TGFBI, TNS1, TPM1	PMID: 29443960
	WNT_IN_CANCER	AMER1, APC, AXIN1, CSNK1A1, CTBP1, CTBP2, CTNNB1, DKK1, DKK2, DKK4, FZD4, FZD5, FZD6, FZD8, GSK3B, KREMEN1, KREMEN2, LRP5, LRP6, PORCN, PPP2CA, PPP2CB, PPP2R1A, PPP2R1B, PPP2R5A, PPP2R5B, PPP2R5C, PPP2R5D, PPP2R5E, RNF43, TCF7L2, TNKS, TNKS2, WNT3A	REACTOME_SIGNALING_BY_WNT_IN_CANCER https://www.gsea-msigdb.org/gsea/msigdb/geneset_page.jsp?geneSetName=REACTOME_SIGNALING_BY_WNT_IN_CANCER&keywords=wnt
	Cell cycle	ABL1, ANAPC1, ANAPC10, ANAPC11, ANAPC13, ANAPC2, ANAPC4, ANAPC5, ANAPC7, ATM, ATR, BUB1, BUB1B, BUB3, CCNA1, CCNA2, CCNB1, CCNB2, CCNB3, CCND1, CCND2, CCND3, CCNE1, CCNE2, CCNH, CDC14A, CDC14B, CDC16, CDC20, CDC23, CDC25A, CDC25B, CDC25C, CDC26, CDC27, CDC45, CDC6, CDC7, CDK1, CDK2, CDK4, CDK6, CDK7, CDKN1A, CDKN1B, CDKN1C, CDKN2A, CDKN2B, CDKN2C, CDKN2D, CHEK1, CHEK2, CREBBP, CUL1, DBF4, E2F1, E…	KEGG hsa4110
	G1_S_CELL_CYCLE	ABCA5, ABHD10, ABHD4, ACYP1, ADAMTS1, ADCK2, ADCY6, AHI1, AKAP5, AMIGO2, ANK3, ANKRA2, AP3M2, ARGLU1, ARID5B, ARL6IP6, ASPH, ATAD2, BARD1, BBX, BLM, BRCA1, BRIP1, C1GALT1, CASP2, CASP8AP2, CCN1, CCN2, CCND3, CCNE1, CCNE2, CDC25A, CDC6, CDC7, CDCA7, CDH10, CDH24, CDT1, CENPQ, CHAF1A, CHAF1B, CHEK1, CLSPN, CNNM3, COL4A4, CTPS1, DCLRE1A, DCLRE1B, DLGAP1, DNAJC3, DNAJC6, DSCC1, DTL, DUSP10, E2F1, E2F…	FISCHER_G1_S_CELL_CYCL https://www.gsea-msigdb.org/gsea/msigdb/geneset_page.jsp?geneSetName=FISCHER_G1_S_CELL_CYCLE&keywords=FISCHER_G1_S_CELL_CYCLE
	G2_M_CELL_CYCLE	ACSL4, ADGRE5, ADGRG6, AMD1, ANLN, ANP32E, ANXA3, ARHGAP11A, ARHGAP11B, ARHGAP19, ARHGEF39, ARL4A, ARL6IP1, ASPM, ATF7IP, AURKA, AURKB, BAG3, BCAR3, BIRC3, BIRC5, BMP2, BRD8, BTBD3, BTG1, BUB1, BUB1B, BUB3, CABYR, CCNA2, CCNB1, CCNB2, CCNF, CCSAP, CDC20, CDC25B, CDC25C, CDC27, CDC42EP4, CDCA2, CDCA3, CDCA8, CDK1, CDKL5, CDKN1B, CDKN2C, CDKN2D, CDR2, CEMIP, CENPA, CENPE, CENPF, CENPL, CEP350, CEP5…	FISCHER_G2_M_CELL_CYCLE https://www.gsea-msigdb.org/gsea/msigdb/geneset_page.jsp?geneSetName=FISCHER_G2_M_CELL_CYCLE&keywords=FISCHER_G2_M_CELL_CYCLE
	DNA replication	DNA2, FEN1, LIG1, MCM2, MCM3, MCM4, MCM5, MCM6, MCM7, PCNA, POLA1, POLA2, POLD1, POLD2, POLD3, POLD4, POLE, POLE2, POLE3, POLE4, PRIM1, PRIM2, RFC1, RFC2, RFC3, RFC4, RFC5, RNASEH1, RNASEH2A, RNASEH2B, RNASEH2C, RPA1, RPA2, RPA3, RPA4, SSBP1	KEGG hsa3030
	DNA damage repair	ALKBH2, ALKBH3, APEX1, APEX2, APLF, ATM, ATR, ATRIP, BLM, BRCA1, BRCA2, BRIP1, CCNH, CDK7, CETN2, CHAF1A, CHEK1, CHEK2, CLK2, DCLRE1C, DDB1, DDB2, DUT, ENDOV, ERCC1, ERCC2, ERCC3, ERCC4, ERCC5, ERCC6, ERCC8, FAN1, FANCA, FANCB, FANCC, FANCD2, FANCE, FANCF, FANCG, FANCL, FANCM, GTF2H1, GTF2H2, GTF2H3, GTF2H4, GTF2H5, H2AFX, HLTF, HUS1, LIG1, LIG3, LIG4, MBD4, MDC1, MGMT, MLH1, MLH3, MMS19, MNAT1, …	Wood lab
	DNA damage repair 2	ATM, ATR, BLM, BRCA1, BRCA2, BRIP1, CHEK1, CHEK2, ERCC4, FANCA, FANCC, FANCD2, FANCE, FANCF, FANCG, FANCL, FANCM, MLH1, MSH2, MSH6, MUTYH, NUDT1, PALB2, PARP1, PARP2, PARP3, PMS2, POLD1, POLE, PRKDC, RAD51C, RPA1, TP53	Wood lab
	Mismatch repair	EXO1, LIG1, MLH1, MLH3, MSH2, MSH3, MSH6, PCNA, PMS2, POLD1, POLD2, POLD3, POLD4, RFC1, RFC2, RFC3, RFC4, RFC5, RPA1, RPA2, RPA3, RPA4, SSBP1	KEGG hsa3430
	Homologous recombination	BLM, BRCA2, EME1, MRE11A, MUS81, NBN, POLD1, POLD2, POLD3, POLD4, RAD50, RAD51, RAD51B, RAD51C, RAD51D, RAD52, RAD54B, RAD54L, RPA1, RPA2, RPA3, RPA4, SHFM1, SSBP1, TOP3A, TOP3B, XRCC2, XRCC3	KEGG hsa3440
	Mismatch repair	EXO1, LIG1, MLH1, MLH3, MSH2, MSH3, MSH6, PCNA, PMS2, POLD1, POLD2, POLD3, POLD4, RFC1, RFC2, RFC3, RFC4, RFC5, RPA1, RPA2, RPA3, RPA4, SSBP1	KEGG hsa3430
	CD8 T effector	CXCL9, GZMA, GZMB, IFNG, PRF1, TBX21	PMID: 26952546
	CD8 T effector 2	IFNG, PRF1
	CD8T effector 3	PRF1, EOMES, IFNG, TNF, CXCL9, CXCL10, CD8A, CD4, FOXP3, ICOS, CTLA4	PMID:30181337
	T cell inflamed	CXCR6, TIGIT, CD27, CD274, PDCD1LG2, LAG3, NKG7, PSMB10, CMKLR1, CD8A, IDO1, CCL5, CXCL9, HLA-DQA1, CD276, HLA-DRB1, STAT1, HLA-E	PMID:28650338
	T cell inflamed 2	IRF1, CD8A, CCL2, CCL3, CCL4, CXCL9, CXCL10, ICOS, GZMK, HLA-DMA, HLA-DMB, HLA-DOA, HLA-DOB	PMID:30181337
	T cell inflamed 3	CD8A, CCL2, CCL3, CCL4, CXCL9, CXCL10, ICOS, GZMK, IRF1, HLA-DMB, HLA-DOA, HLA-DOB	PMID:25970248
	IFN-γ 1	IDO1, CXCL10, CXCL9, HLA-DRA, STAT1, IFNG	PMID:28650338
	IFN-γ 2	CD3D, IDO1, CIITA, CD3E, CCL5, GZMK, CD2, HLA-DRA, CXCL13, IL2RG, NKG7, HLA-E, CXCR6, LAG3, TAGAP, CXCL10, STAT1, GZMB	PMID:28650338
	IFN-γ 3	CD8A, CCL5, CD27, CD274, PDCD1LG2, CD276, CMKLR1, CXCL9, CXCR6, HLA-DQA1, HLA-DRB1, HLA-E, IDO1, LAG3, NKG7, PSMB10, STAT1, TIGIT	PMID:30181337
	Immune checkpoint	CD274, CTLA4, HAVCR2, LAG3, PDCD1, PDCD1LG2, TIGIT
	Antigen processing machinery	PSMB5, PSMB6, PSMB7, PSMB8, PSMB9, PSMB10, TAP1, TAP2, ERAP1, ERAP2, CANX, CALR, PDIA3, TAPBP, B2M, HLA-A, HLA-B, HLA-C	PMID:31767055
	Antigen processing machinery 2	B2M, HLA-A, HLA-B, HLA-C, TAP1, TAP2	PMID: 27855702

## Sheet: Table S9
The sequence of oligonucleotides and primers used in this study
Gene	Sequence (5’-3’)	Application
si-NC	sense:UUCUCCGAACGUGUCACGUdTdT	si-RNA
	antisense:ACGUGACACGUUCGGAGAAdTdT
si-F2RL1#1	sense:GCUCUUUGUAAUGUGCUUAUUdTdT	si-RNA
	antisense:AAUAAGCACAUUACAAAGAGCdTdT
si-F2RL1#2	sense:CCACUGUUAAGACCUCCUAUUdTdT	si-RNA
	antisense:AAUAGGAGGUCUUAACAGUGGdTdT
sh-NC	CCTAAGGTTAAGTCGCCCTCG	sh-RNA
sh-F2RL1#1	GCTCTTTGTAATGTGCTTATT	sh-RNA
sh-F2RL1#2	GCCTCAGTGTGCAGAGGTATT	sh-RNA
GAPDH	F:CACATCGCTCAGACACCATG	qRT-PCR
	R:TGACGGTGCCATGGAATTTG
F2RL1	F:ACCATCCAAGGAACCAGTAGA	qRT-PCR
	R:GGAAGGAAGACAGTGGTCAGT
GSTP1	F:ACCCTGTACCAGTCCAATACCA	qRT-PCR
	R:TGAGGGAGATGTATTTGCAGCG
ERBB2	F:CCAAGAGGTGACAGCAGAGGAT	qRT-PCR
	R:AAACTCCTGGATATTGGCACTGG
MUC1	F:ACCTACCATCCTATGAGCGAGT	qRT-PCR
	R:GGTTTGTGTAAGAGAGGCTGCT
PTGS2	F:AATGGGGTGATGAGCAGTTGTT	qRT-PCR
	R:AGCCACTCAAGTGTTGCACATA
CCND1	F:GCGGAGGAGAACAAACAGATCA	qRT-PCR
	R:AGGGCGGATTGGAAATGAACTT
CXCL8	F:TCCAAACCTTTCCACCCCAAAT	qRT-PCR
	R:TCCAGACAGAGCTCTCTTCCAT

[truncated: 3 more sheets: Table S10, Table S11, Table S12]
